# Supplementary material for: Hidden partners: Using cross-docking calculations to predict binding sites for proteins with multiple interactions
Source: bioRxiv or medRxiv preprint supplement (doi:10.1101/244913), 2018-03-21
Supplement: Supplementary file [file 244913-1.pdf]

**Supplementary Information for:**  
**Hidden partners: Using cross-docking calculations to predict binding sites for**  
**proteins with multiple interactions**

Nathalie Lagarde<sup>1</sup>, Alessandra Carbone<sup>2,3</sup> and Sophie Sacquin-Mora<sup>1</sup>

<sup>1</sup> Laboratoire de Biochimie Théorique, CNRS UPR9080, Institut de Biologie Physico-Chimique, University Paris Diderot, Sorbonne Paris Cité, 13 rue Pierre et Marie Curie, 75005, Paris, France

<sup>2</sup> Laboratoire de Biologie Computationnelle et Quantitative, CNRS UMR7238, UPMC Univ-Paris 6, Sorbonne Université, 4 place Jussieu, 75005, Paris, France

<sup>3</sup> Institut Universitaire de France, 75005, Paris, France

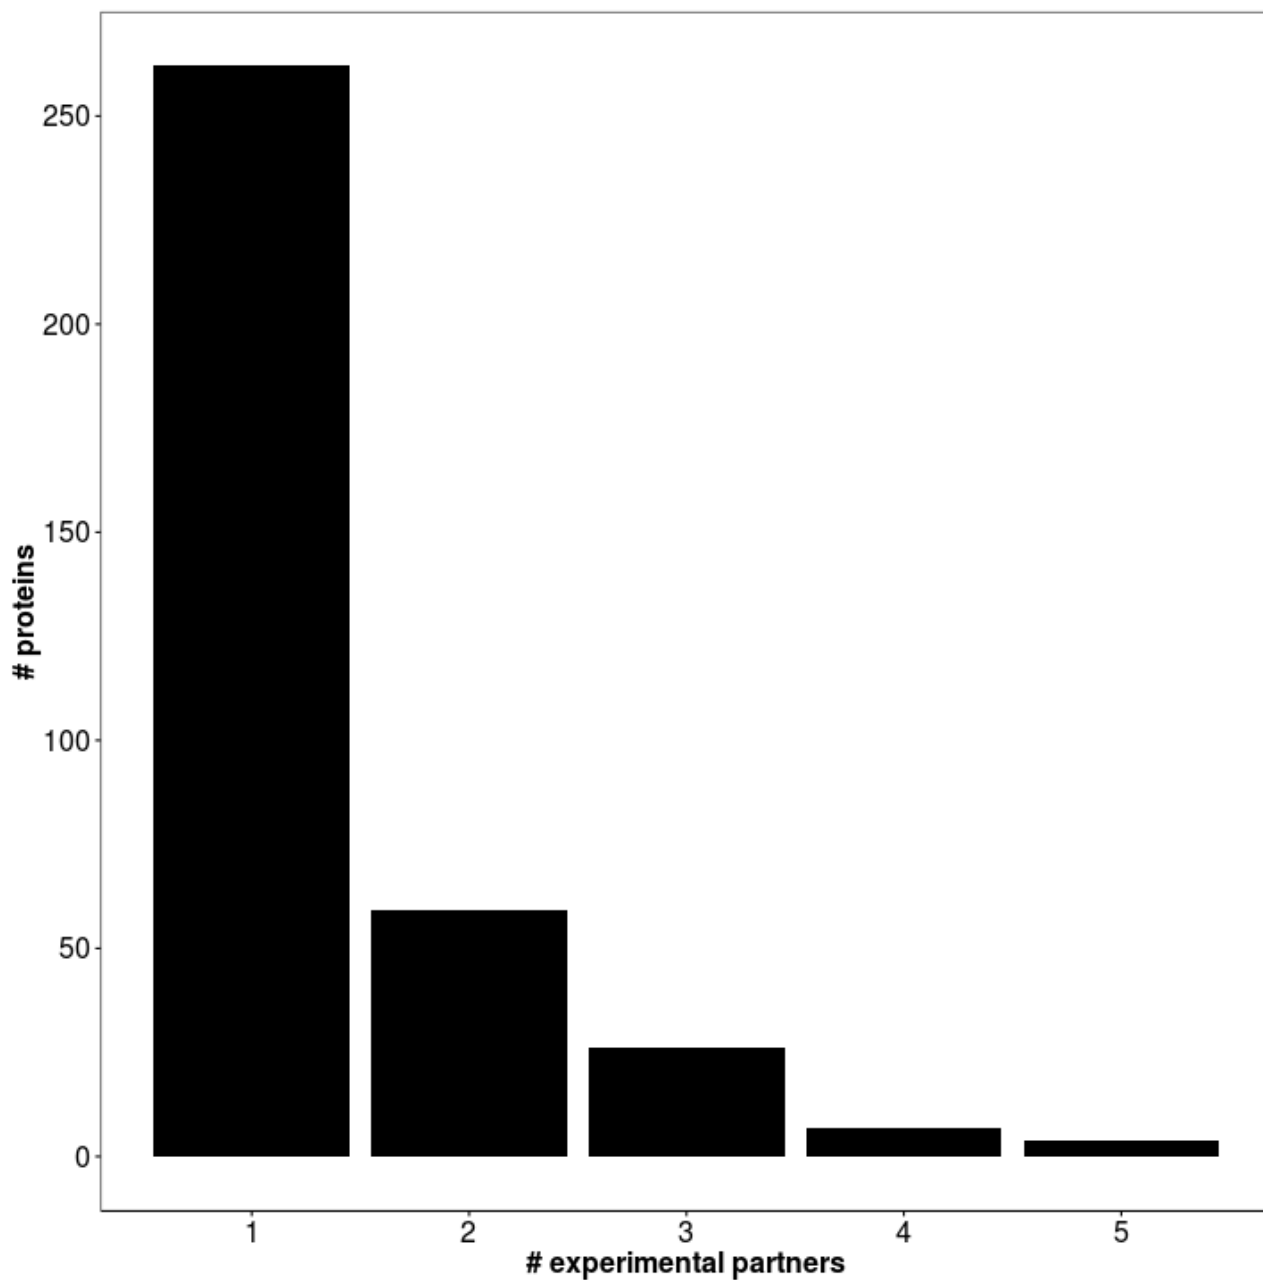

**Figure S1** : Distribution of the number of experimental partners among the proteins included in our cross-docking dataset.

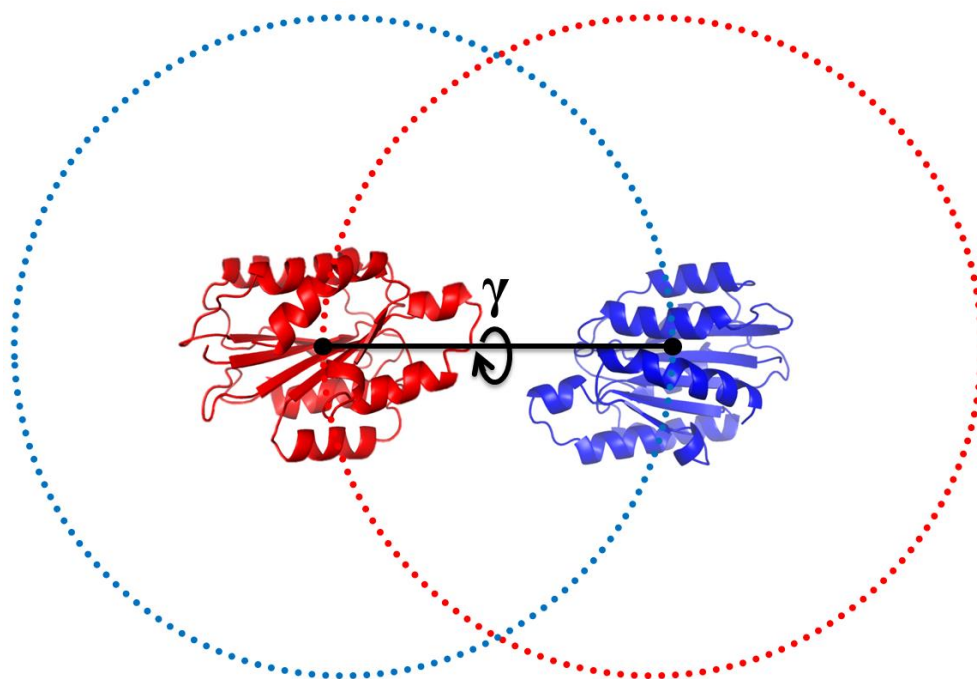

A

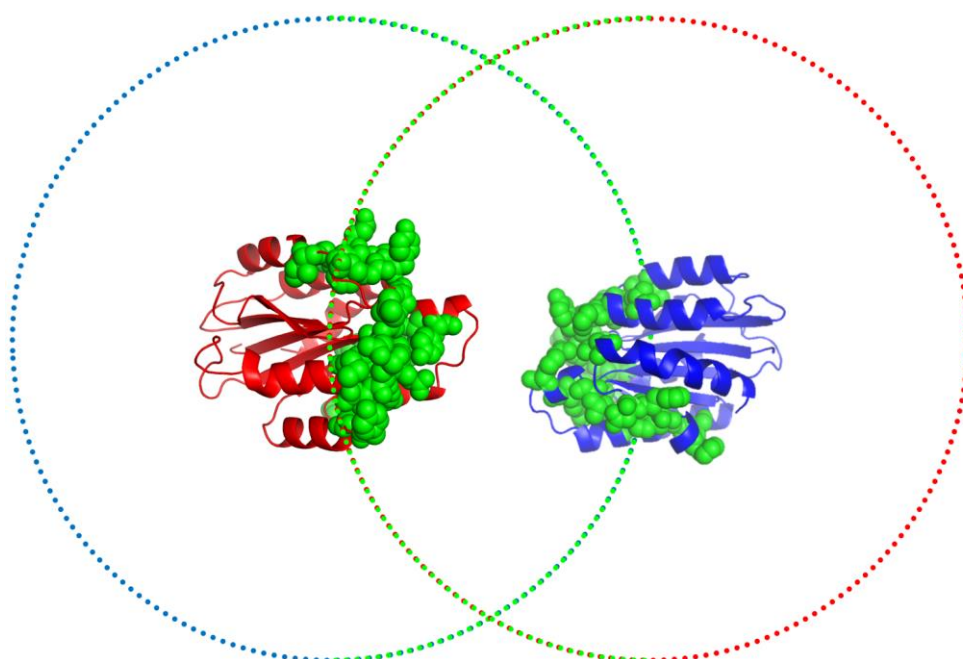

B

**Figure S2:** Starting orientations generation for the rat A1B1 integrin i-domain complex (PDB code 1CK4, 1CK4\_A in red and 1CK4\_B in blue). The systematically generated starting positions for the receptor and ligand proteins are plotted as blue and red points.

(A) Different starting orientations were generated for each starting positions of the receptor and ligand proteins by applying 5 rotations of the gamma Euler angle defined with the axis connecting the centers of mass of the 2 proteins.

(B) After filtration using JET information, docking calculations are only performed for those starting points that are located at the vicinity of JET predicted interface residues (plotted as green spheres on the proteins), thus considerably reducing the computation time.

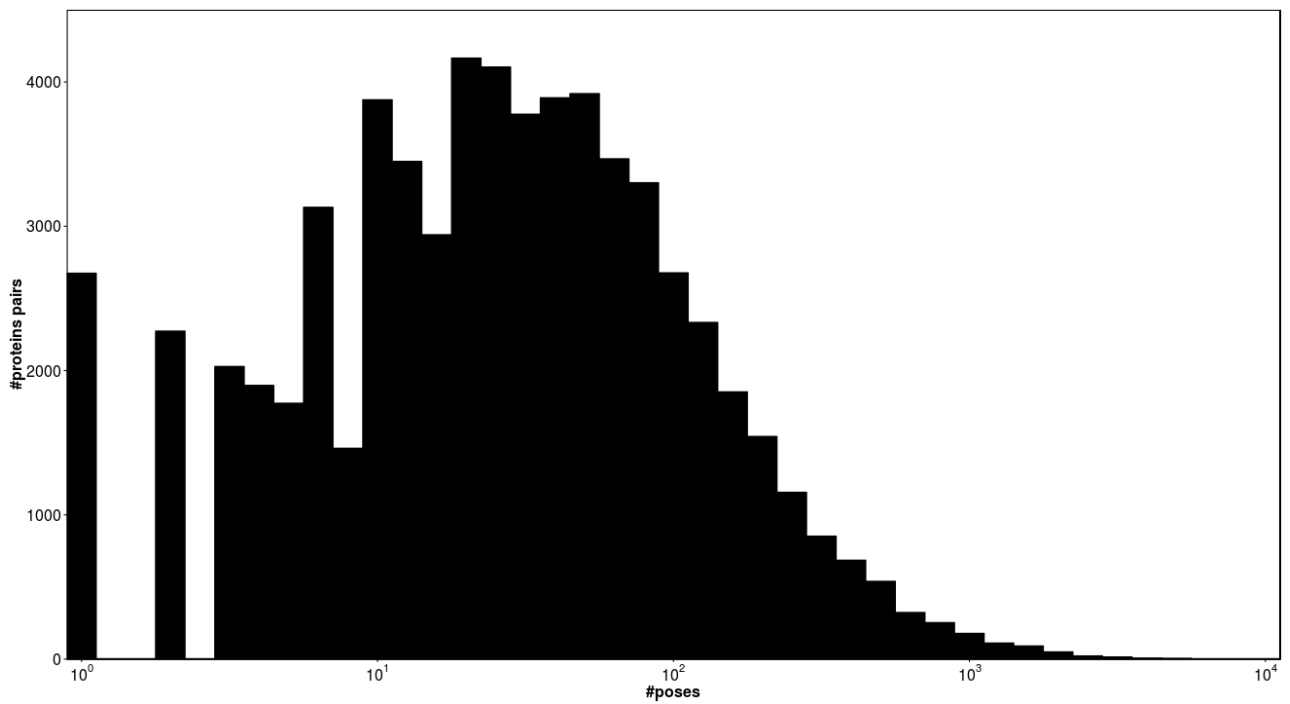

A

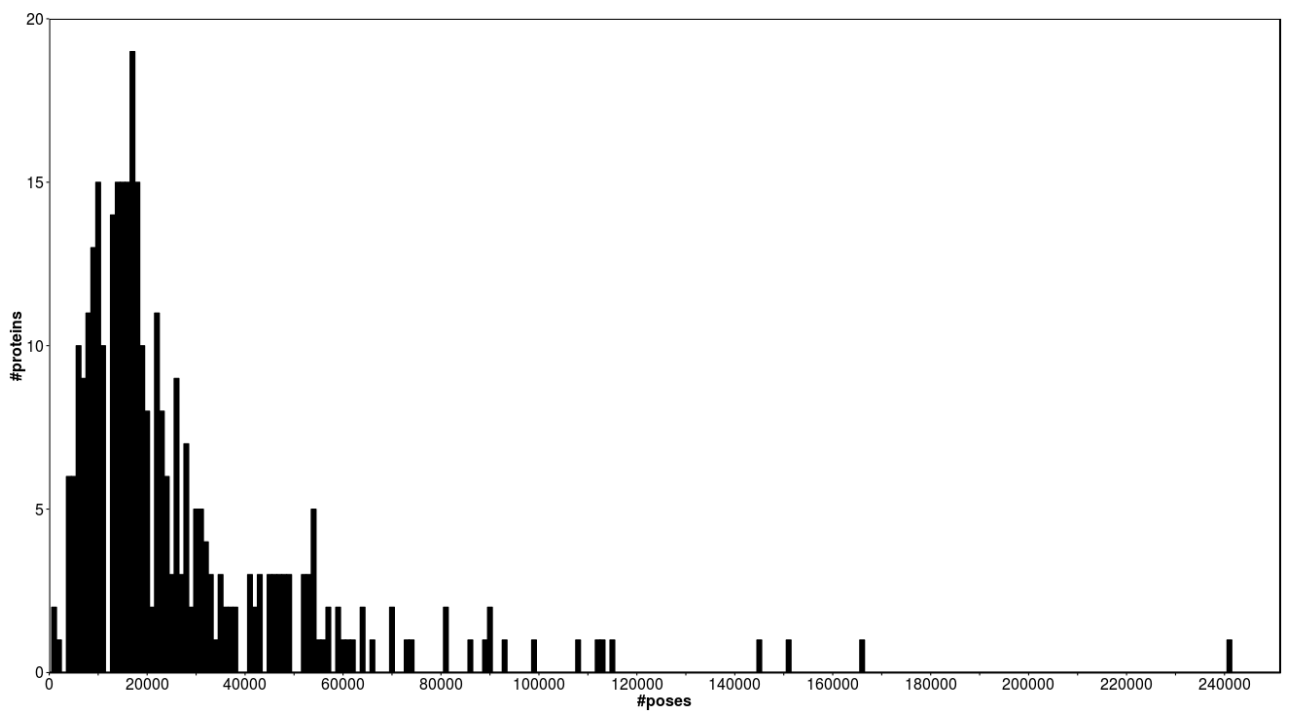

B

**Figure S3 :**

(A) Distribution of the number of kept docking poses (using a logarithmic scale) for each protein pair after filtering on the interaction energy.

(B) Final distribution of the number of kept docking poses for each protein (taking into account all its partners) after filtering on the interaction energy.

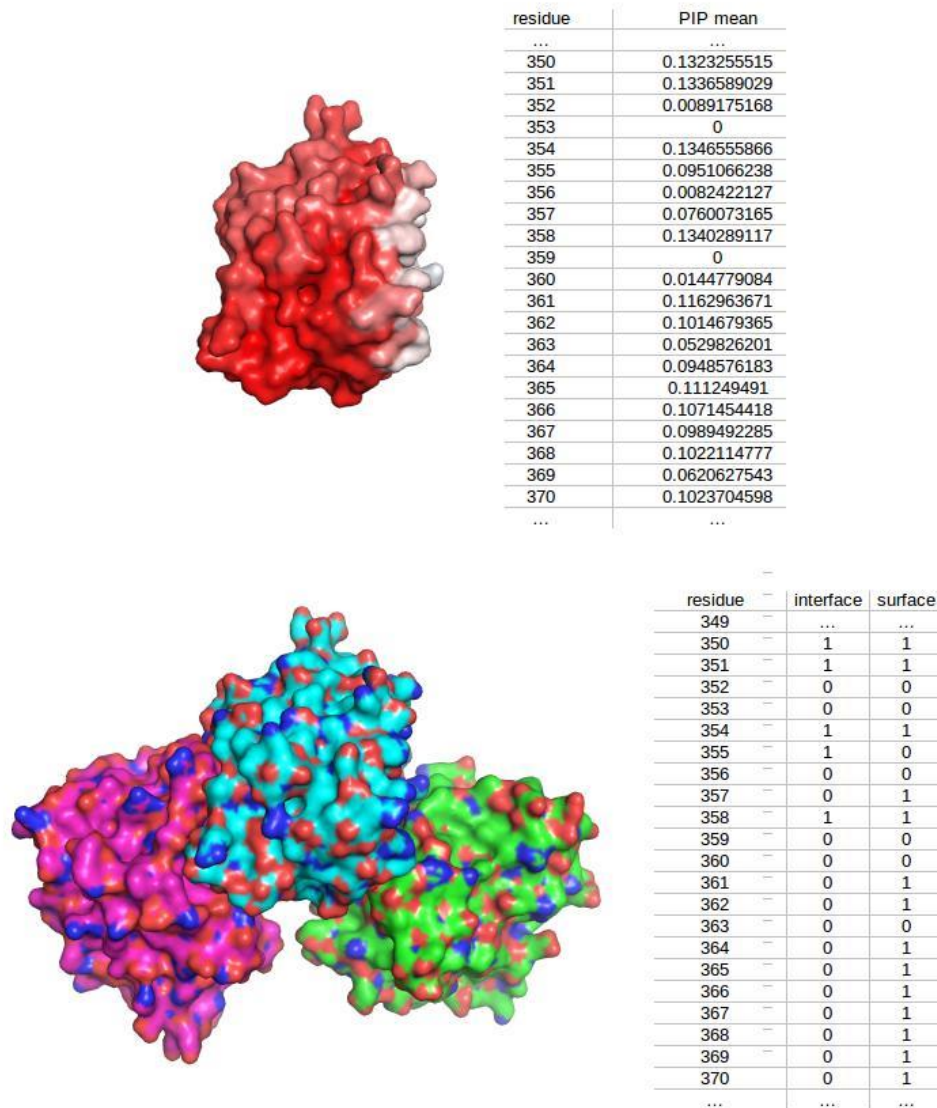

**AUC=0.619**

**Figure S4(A):** « Global interface » (GI) scoring scheme computed for the protein 1IW0\_B (represented in cyan in the bottom panel) that presents 2 experimental partners: 1IW0\_C and 1IW0\_A (respectively in magenta and green in the bottom panel) . The GI score is computed by comparing the PIP values (mapped on the protein's surface in the top panel, high PIP residues showed in white and low PIP residues in red) with one single global reference experimental interface generated by concatenating all the existing experimental interfaces. If a residue is part of the experimental interface between the query protein and at least one of the partners, it is tagged as interface residue in the global reference experimental interface (1 in the « interface » column). Conversely, if a residue is not part of any experimental interfaces, it is tagged as non interface residue (0 in the « interface » column).

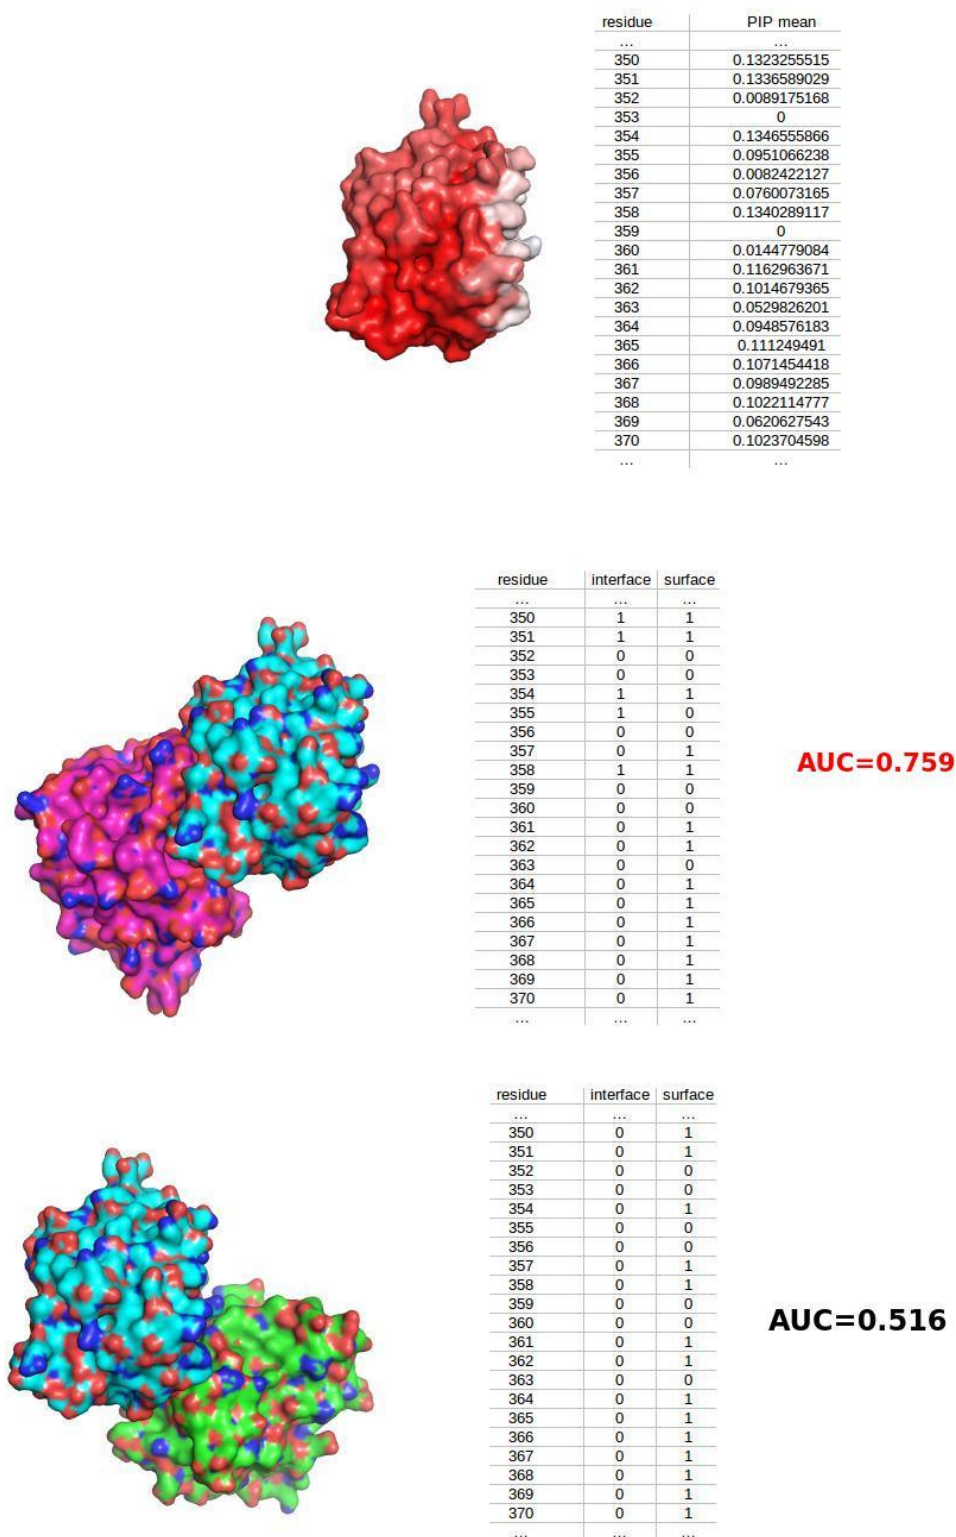

**Figure S4(B):** «Best interface» (BI) scoring scheme computed for the protein 1IW0\_B (represented in cyan in the middle and bottom panels) that presents 2 experimental partners: 1IW0\_C (in magenta in the middle panel) and 1IW0\_A (in green in the bottom panel). The BI score is computed by comparing the PIP values (mapped on the protein's surface in the top panel, high PIP residues showed in blue and low PIP residues in red) to each reference experimental interface separately, and only the predicted interface associated with the best binding site prediction performance was kept.

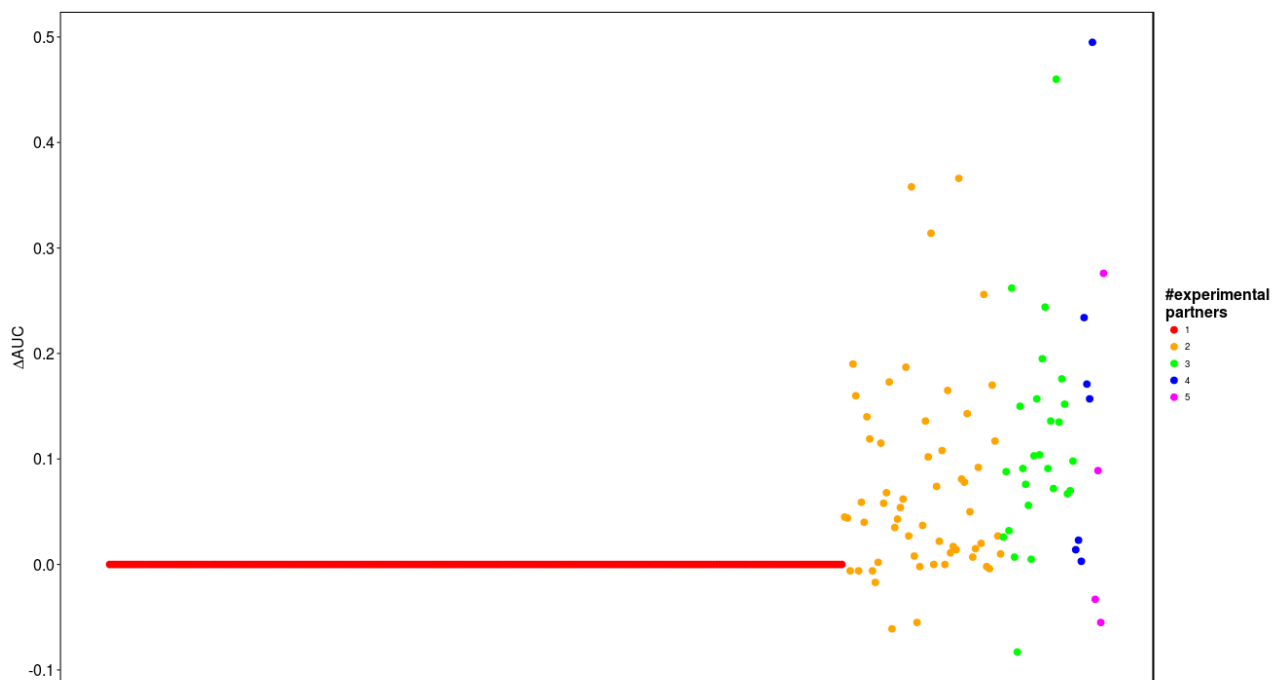

**Figure S5 :** Variation of AUC observed for each protein (the x-axis represents the proteins of the SubHCMD dataset ranked according to their number of partners) between the GI score and the BI score ( $\Delta AUC = AUC_{BI} - AUC_{GI}$ ), the dots colors indicate the number of experimental partners included in the CC-D for each protein.

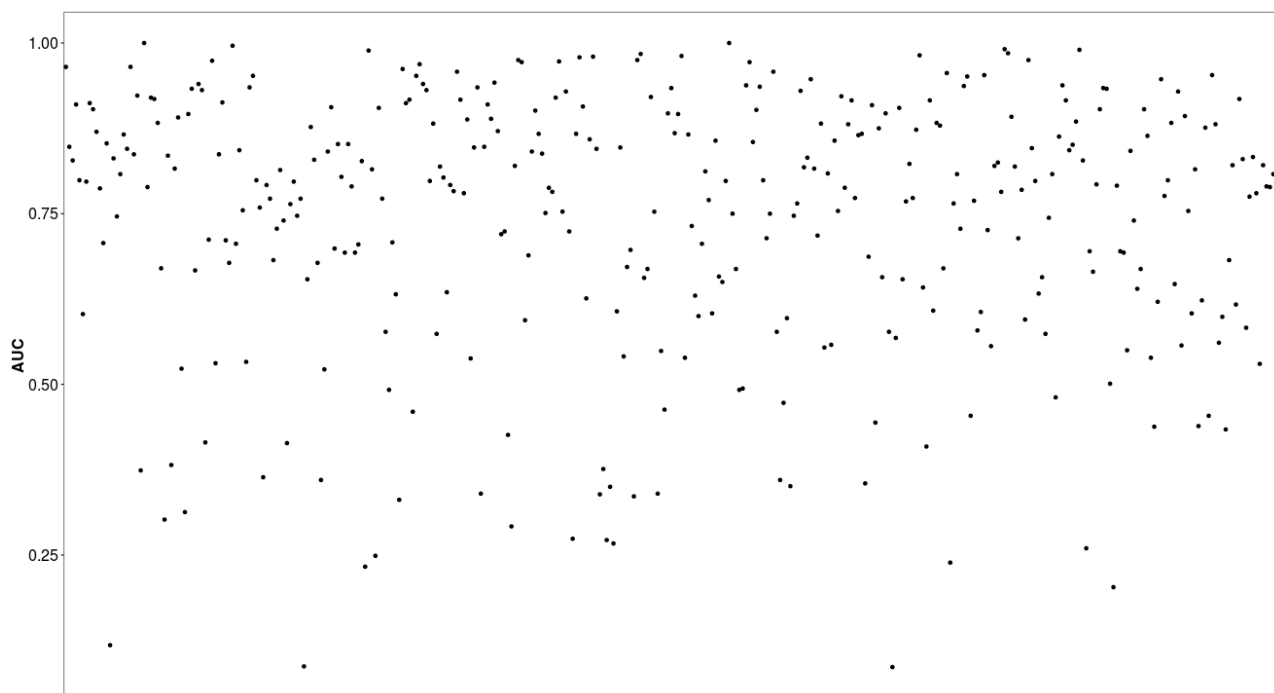

**Figure S6** : AUC value for each protein in our CC-D dataset obtained with the BI score.



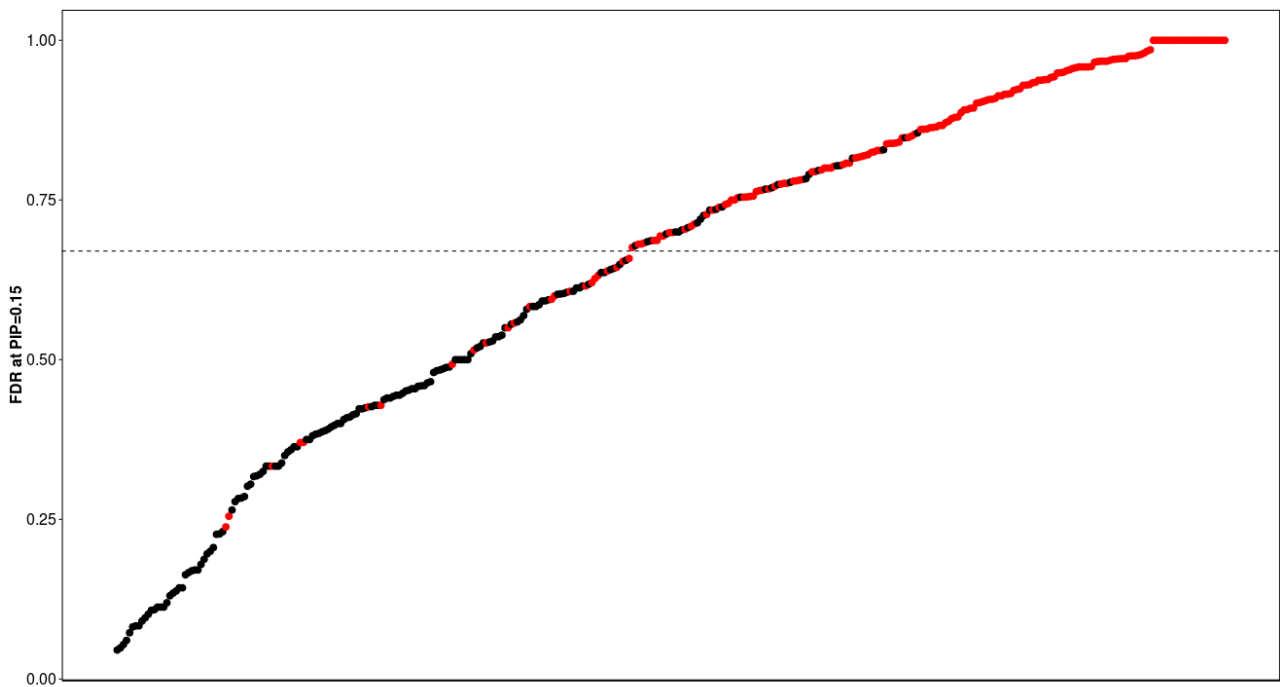

**Figure S7 :** Correlation between the visual protein inspection and the proteins FDR (FP/P) values computed at the optimal PIP cut-off of 0.15. The red dots represent proteins for which predicted alternate interfaces were visually observed by mapping the PIP values on the proteins' surface whereas the black dots point out proteins with no observed predicted alternate interface. Proteins were ordered according to their FDR values. The dot line represents the optimal FDR threshold of 0.67.

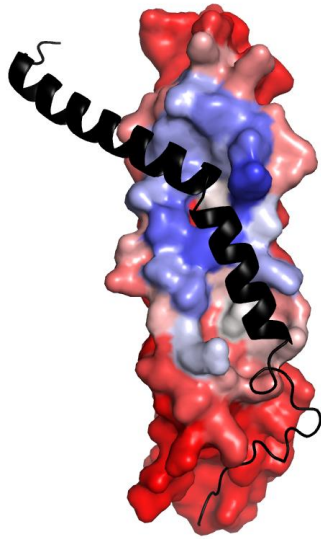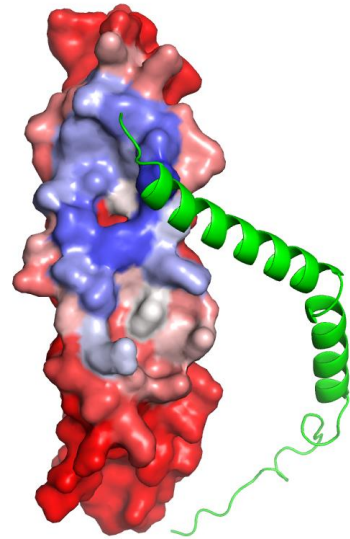

A

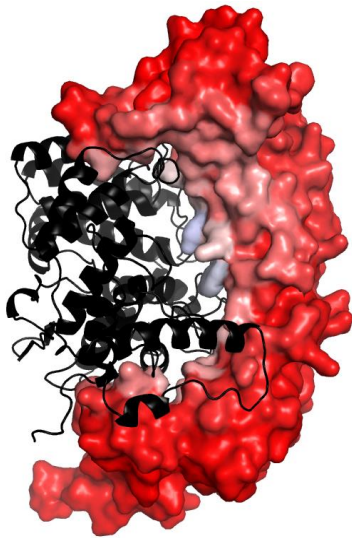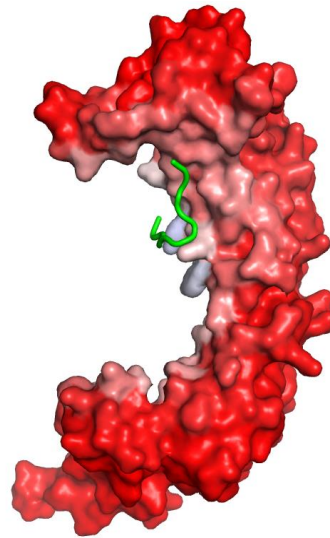

B

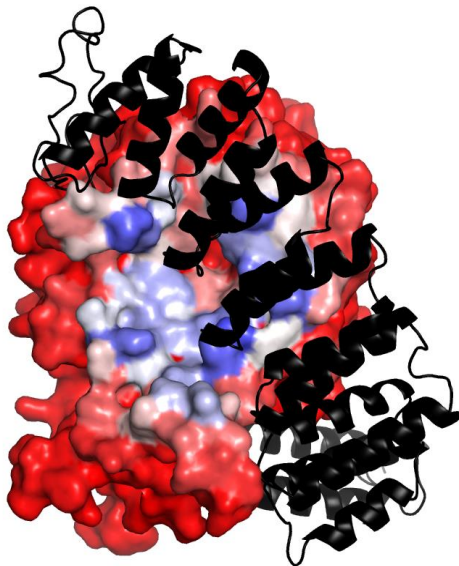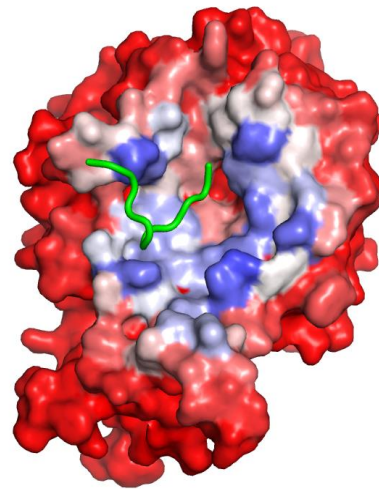

C

Figure S8 (continued next page)

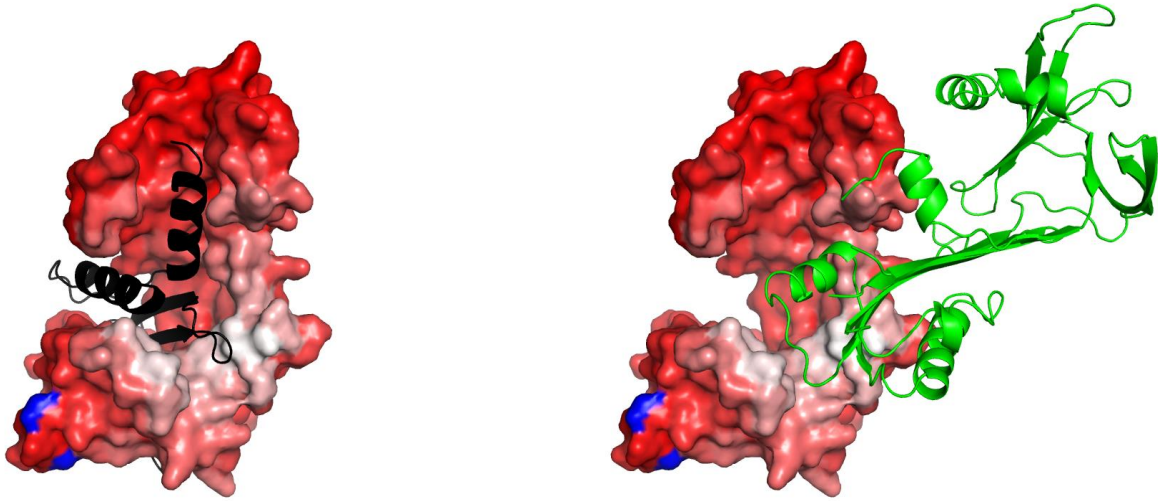

D

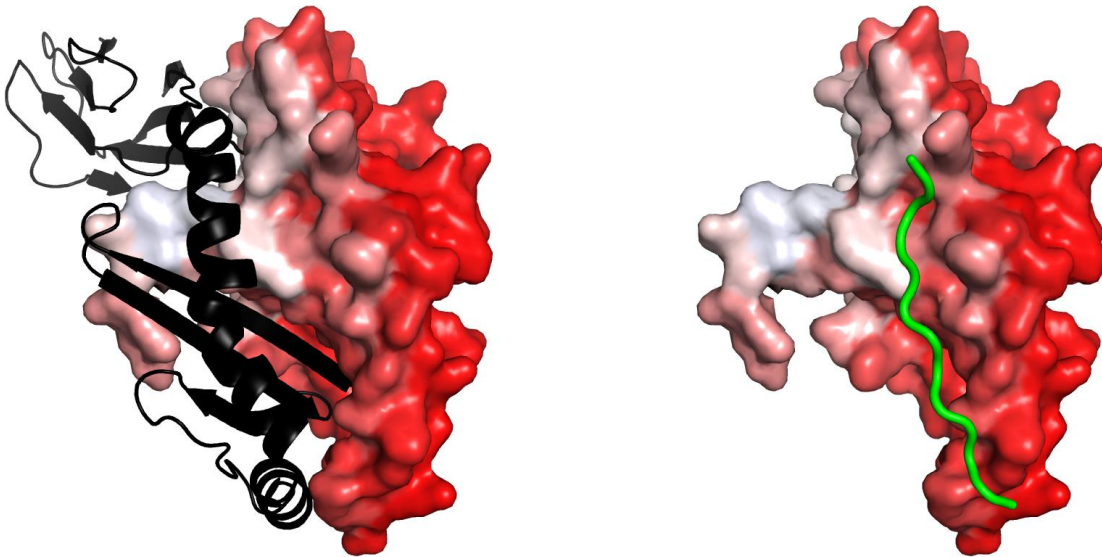

E

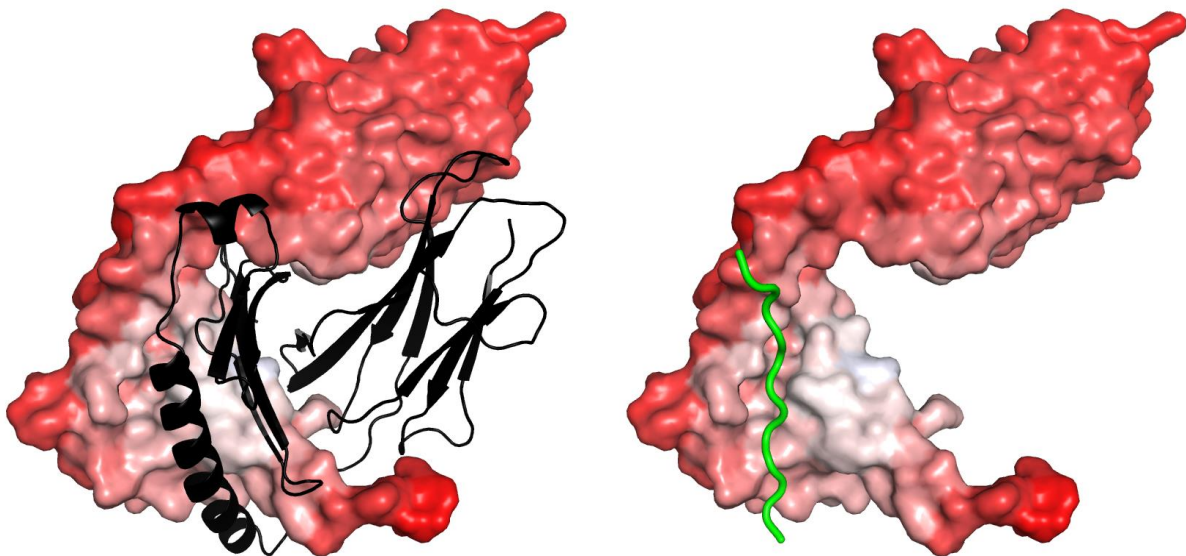

F

**Figure S8** (continued next page)

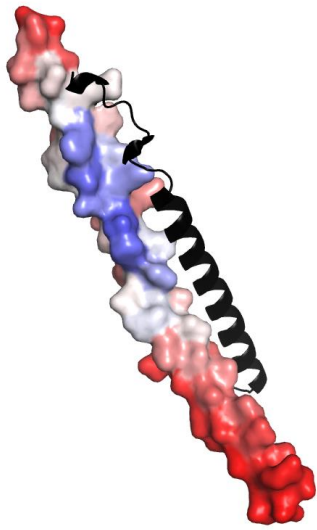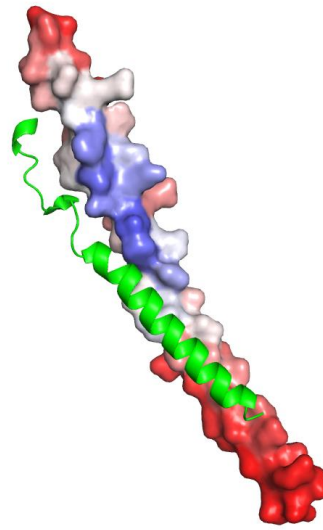

G

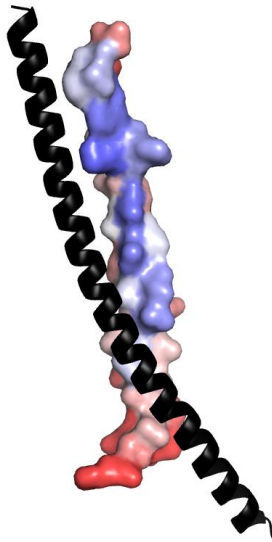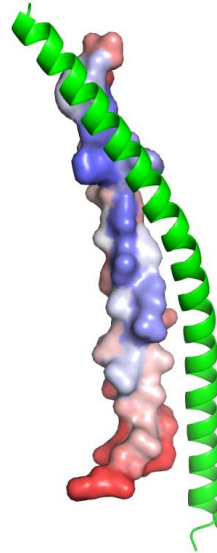

H

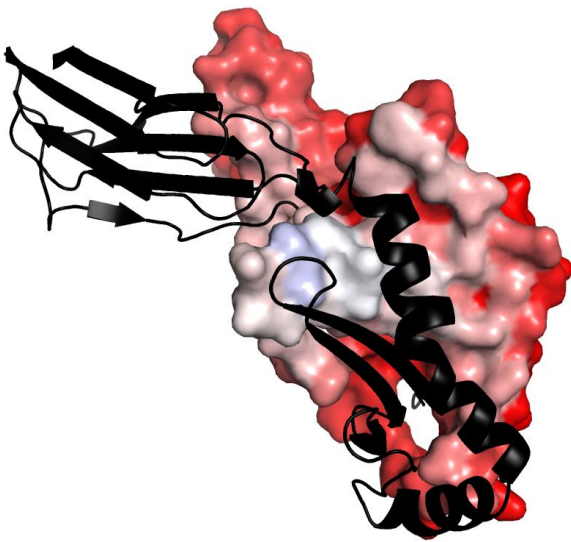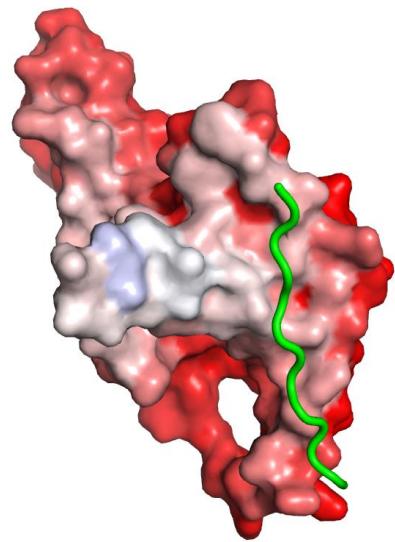

I

Figure S8 (continued next page)

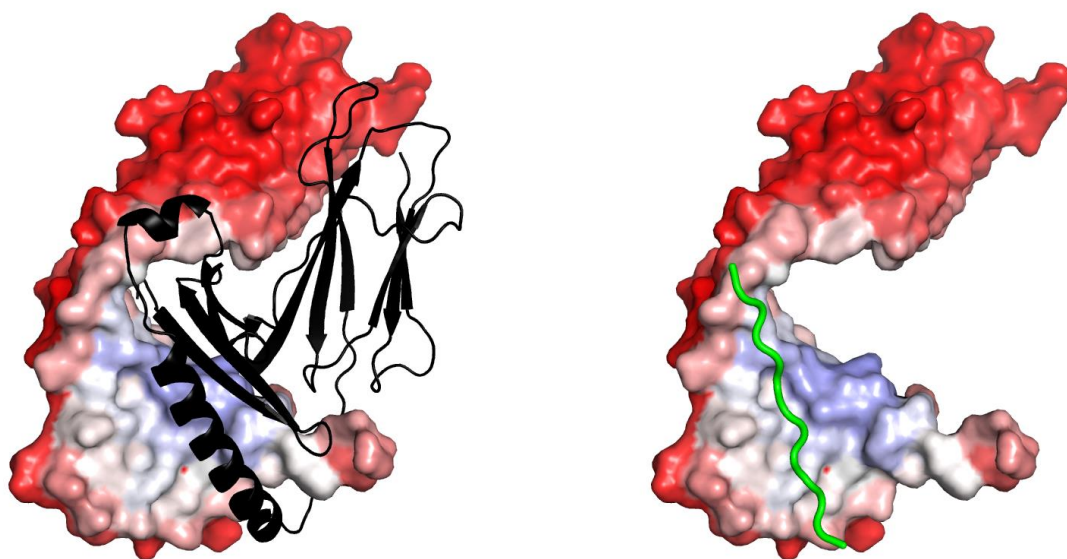

J

**Figure S8(A\_J)** : Mapping the PIP values on a protein's surface, high PIP residues are shown in blue and low PIP residues are shown in red. The reference experimental partner (ref) is shown in a black cartoon representation, while the alternate partner (proteic or peptidic) (alt) is shown in green.

(A) 1AVO\_B with 1AVO\_A(ref) and 1AVO\_C(alt).

(B) 1D8D\_A with 1D8D\_B(ref) and 1D8D\_P(alt).

(C) 1D8D\_B with 1D8D\_A(ref) and 1D8D\_P(alt).

(D) 1JJO\_C with 1JJO\_A(ref), 1JJO\_E(ref) and 1JJO\_D(alt).

(E) 2NNA\_A with 2NNA\_B(ref) and 2NNA\_C(alt).

(F) 2NNA\_B with 2NNA\_A(ref) and 2NNA\_C(alt).

(G) 3BRT\_B with 3BRT\_C(ref) and 3BRT\_A(alt).

(H) 3BRT\_C with 3BRT\_B(ref) and 3BRT\_D(alt).

(I) 3C5J\_A with 3C5J\_B(ref) and 3C5J\_C(alt).

(J) 3C5J\_B with 3C5J\_A(ref) and 3C5J\_C(alt)

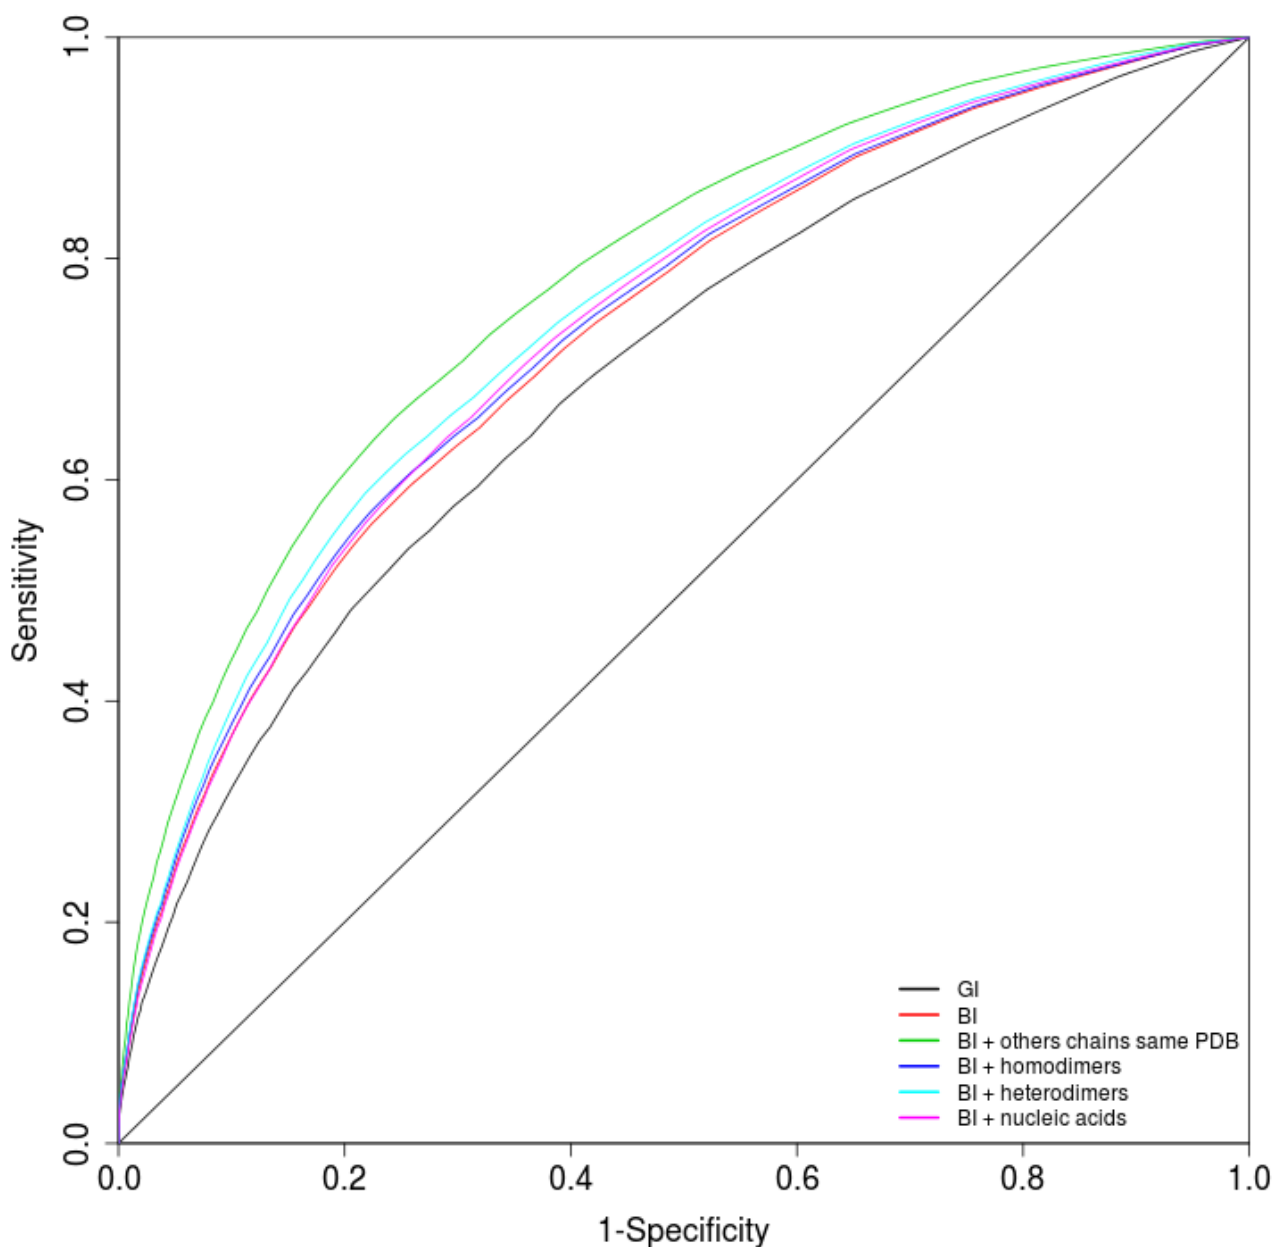

**Figure S9 :** ROC curves of the PIP prediction obtained with the GI score with the reference experimental interfaces (REI) (black line), with the BI score with the REI (red line), with the BI score with REI and alternate experimental interfaces from other chains of the same PDB (green line), with the BI score with REI and alternate experimental interfaces from homodimers (blue line), with the BI score with REI and alternate experimental interfaces from heteromdimers (cyan line) and with the BI score with REI and alternate nucleic acid experimental interfaces (magenta line). The diagonal dotted line corresponds to random prediction.

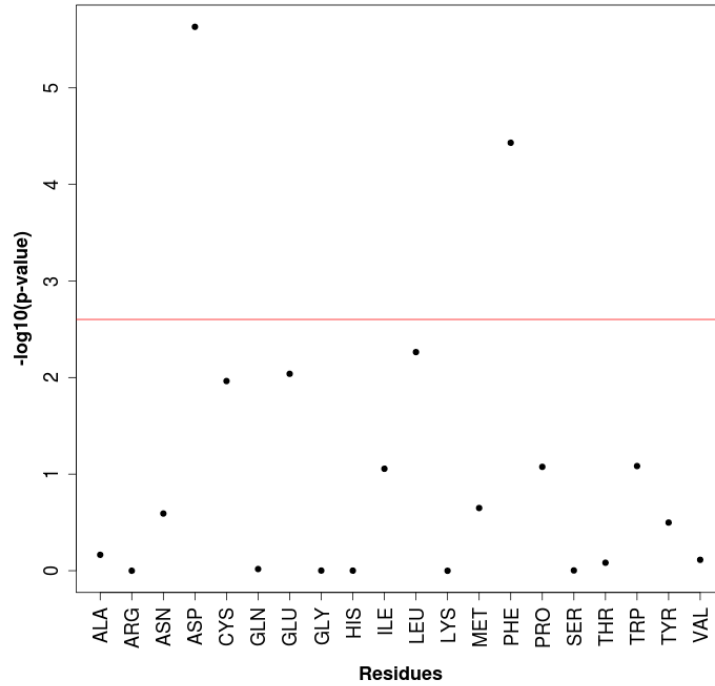

A

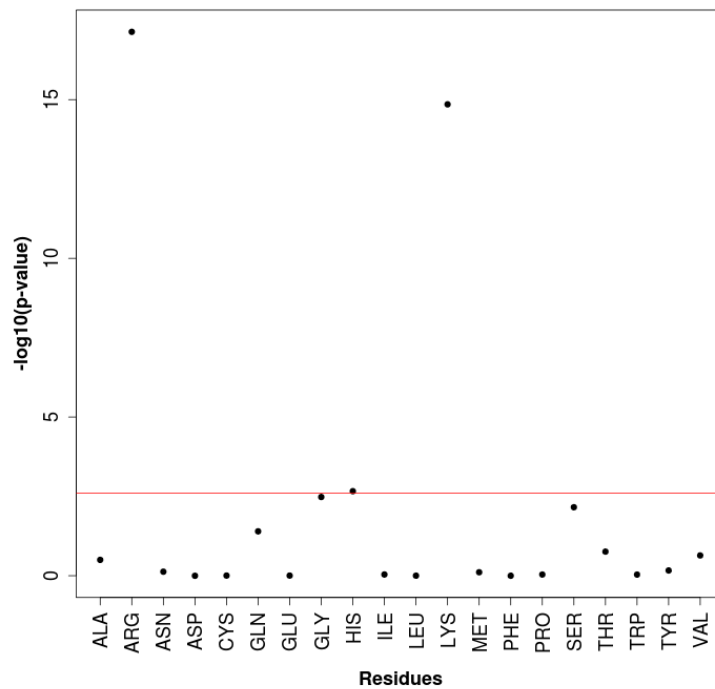

B

**Figure S10** : Residues are plotted as the distribution of the negative logarithmic p-value ( $-\log_{10}(\text{p-value})$ ) of the one-tailed Wilcoxon test for the fraction of each residue type in the interface (FRires(type)) (A) option « less », (B) option « greater ». All dots located above the Bonferroni threshold (red line) display a mean value significantly inferior (A) or superior (B) in the NAI than in the PPI.

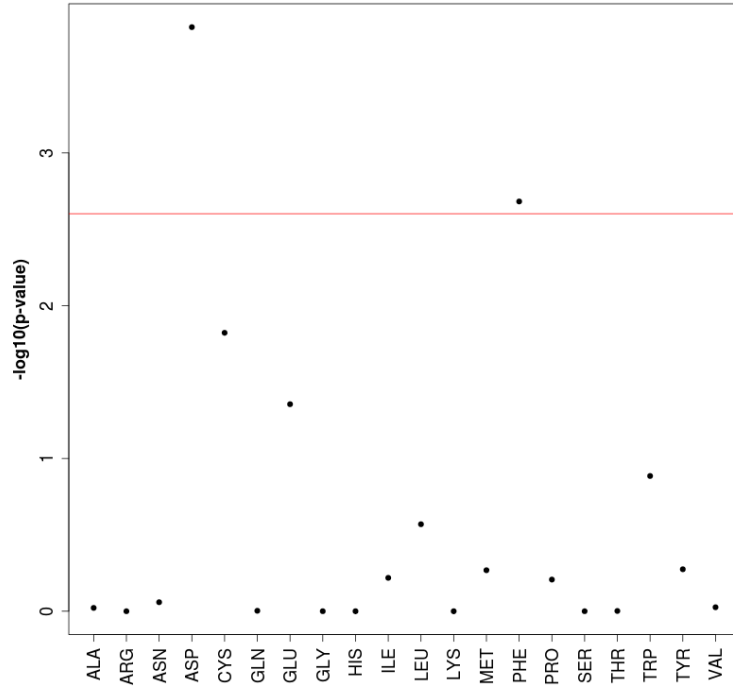

A

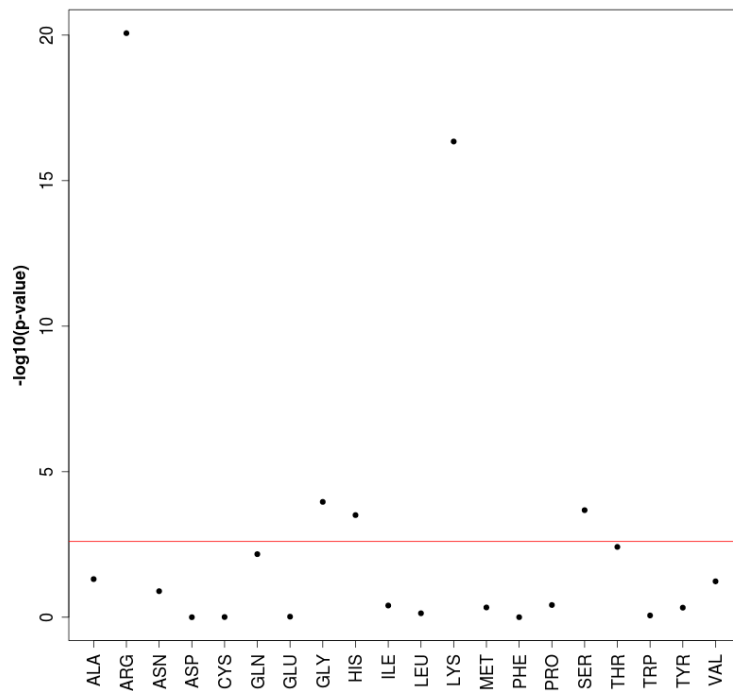

B

**Figure S11** : Residues are plotted as the distribution of the negative logarithmic p-value ( $-\log_{10}(\text{p-value})$ ) of the one-tailed Wilcoxon test for the number of each residue type in the interface (A) option « less », (B) option « greater ». All dots located above the Bonferroni threshold (red line) display a mean value significantly inferior (A) or superior (B) in the NAI than in the PPI.



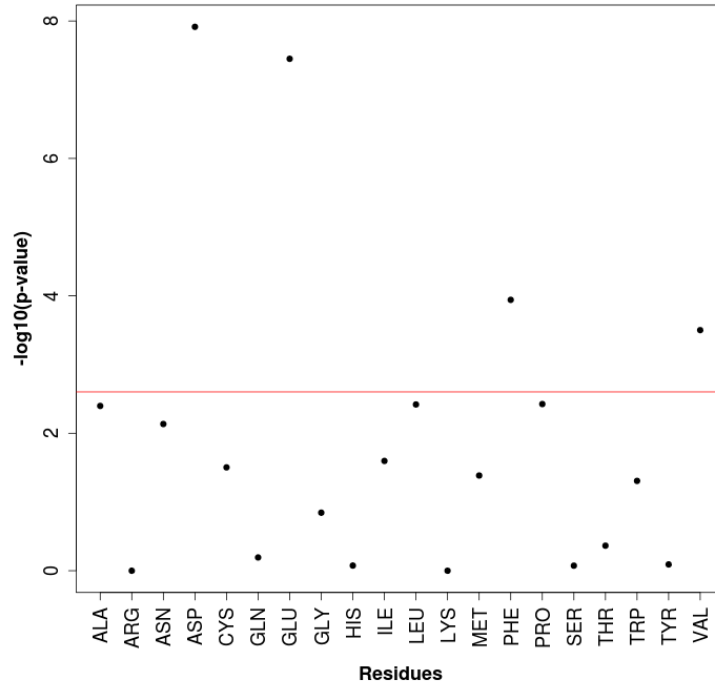

A

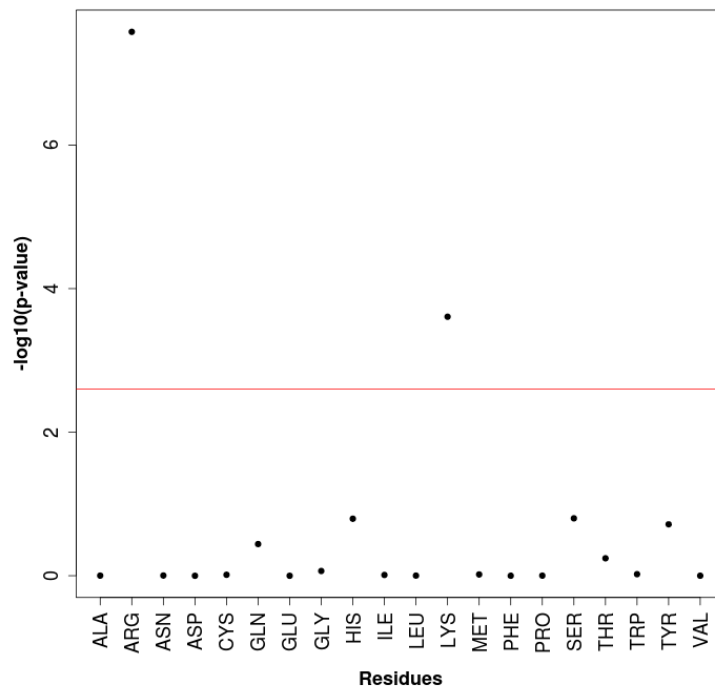

B

**Figure S12 :** Residues are plotted as the distribution of the negative logarithmic p-value ( $-\log_{10}(\text{p-value})$ ) of the one-tailed Wilcoxon test for the fraction of each residue type in the interface ( $\text{FRI}_{\text{res}(\text{type})}$ ) in the NAI compared to the fraction of each residue type observed in the whole corresponding protein surface ( $\text{FRI}_{\text{res}(\text{type})[\text{surface}]}$ ) (A) option « less », (B) option « greater ». All dots located above the Bonferroni threshold (red line) display a mean value significantly inferior (A) or superior (B) in the NAI than in the whole protein surface.

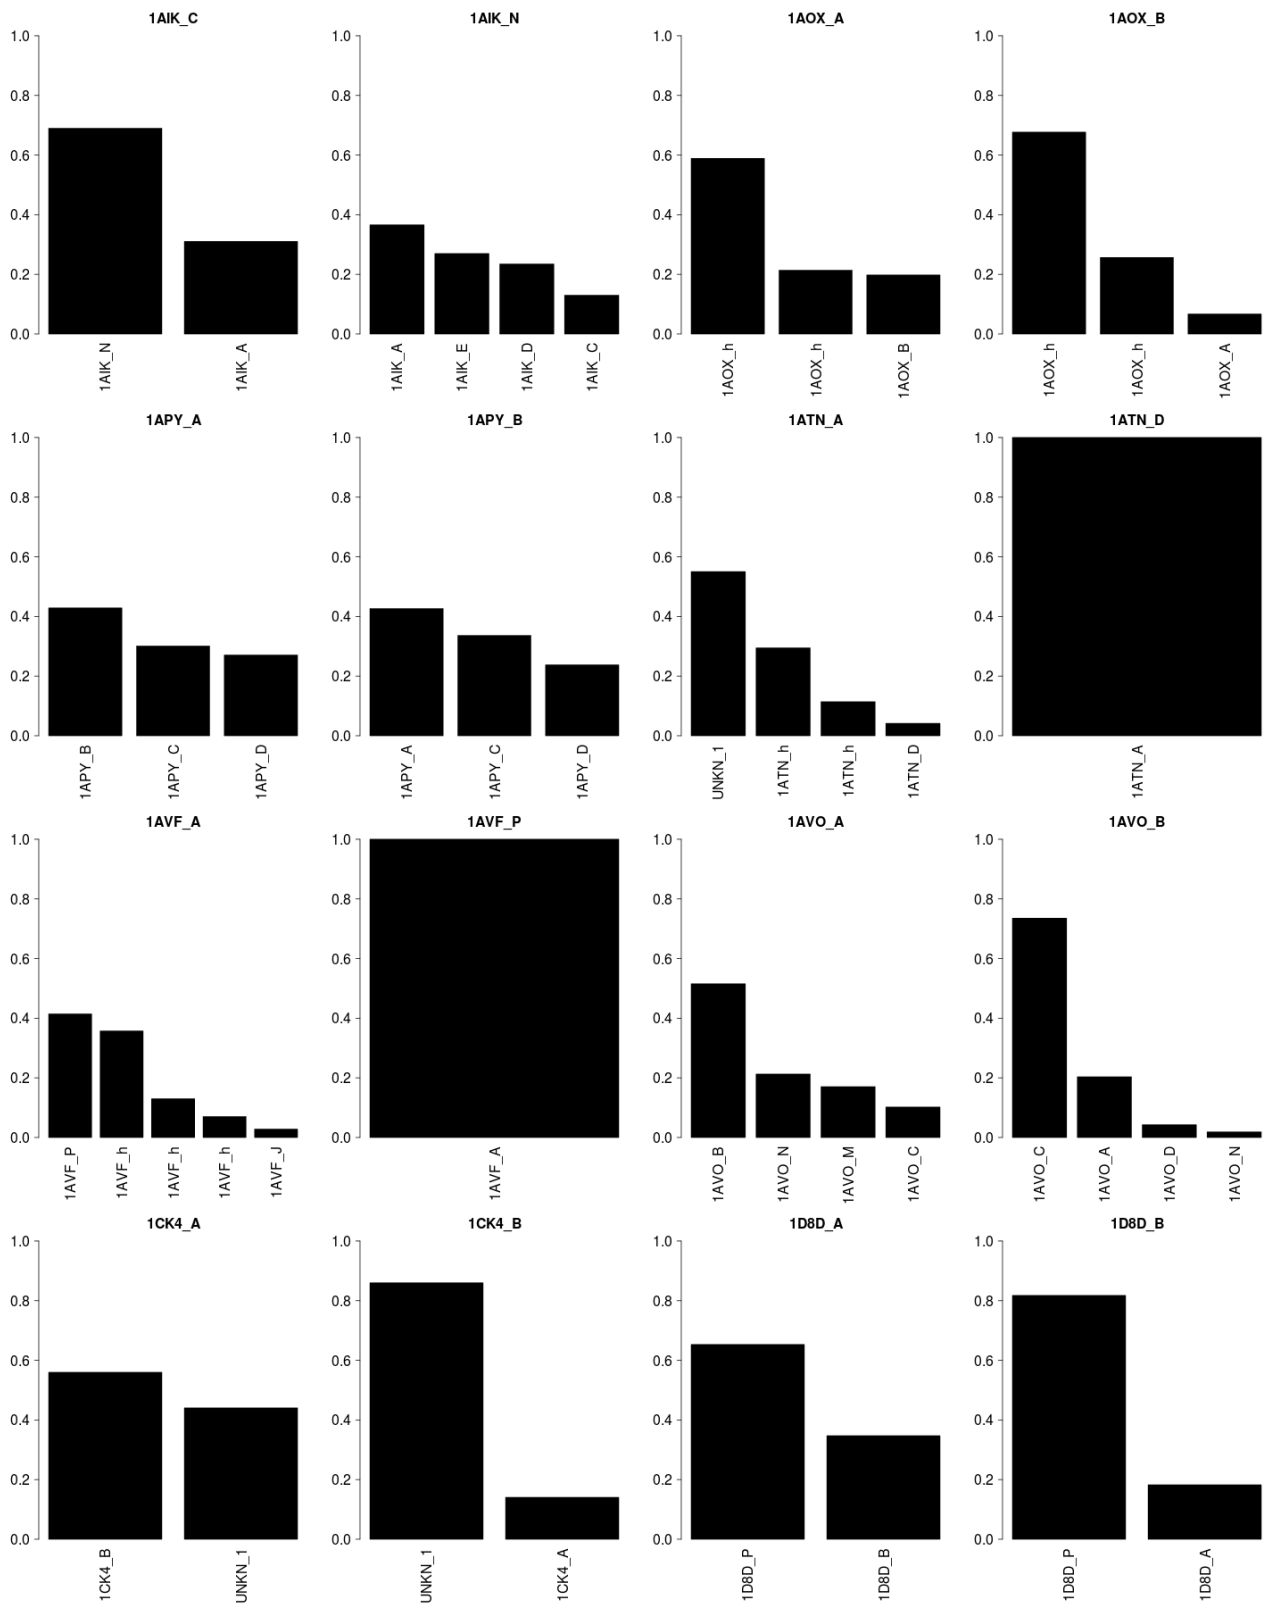

**A**  
**Figure S13** (continued next page)

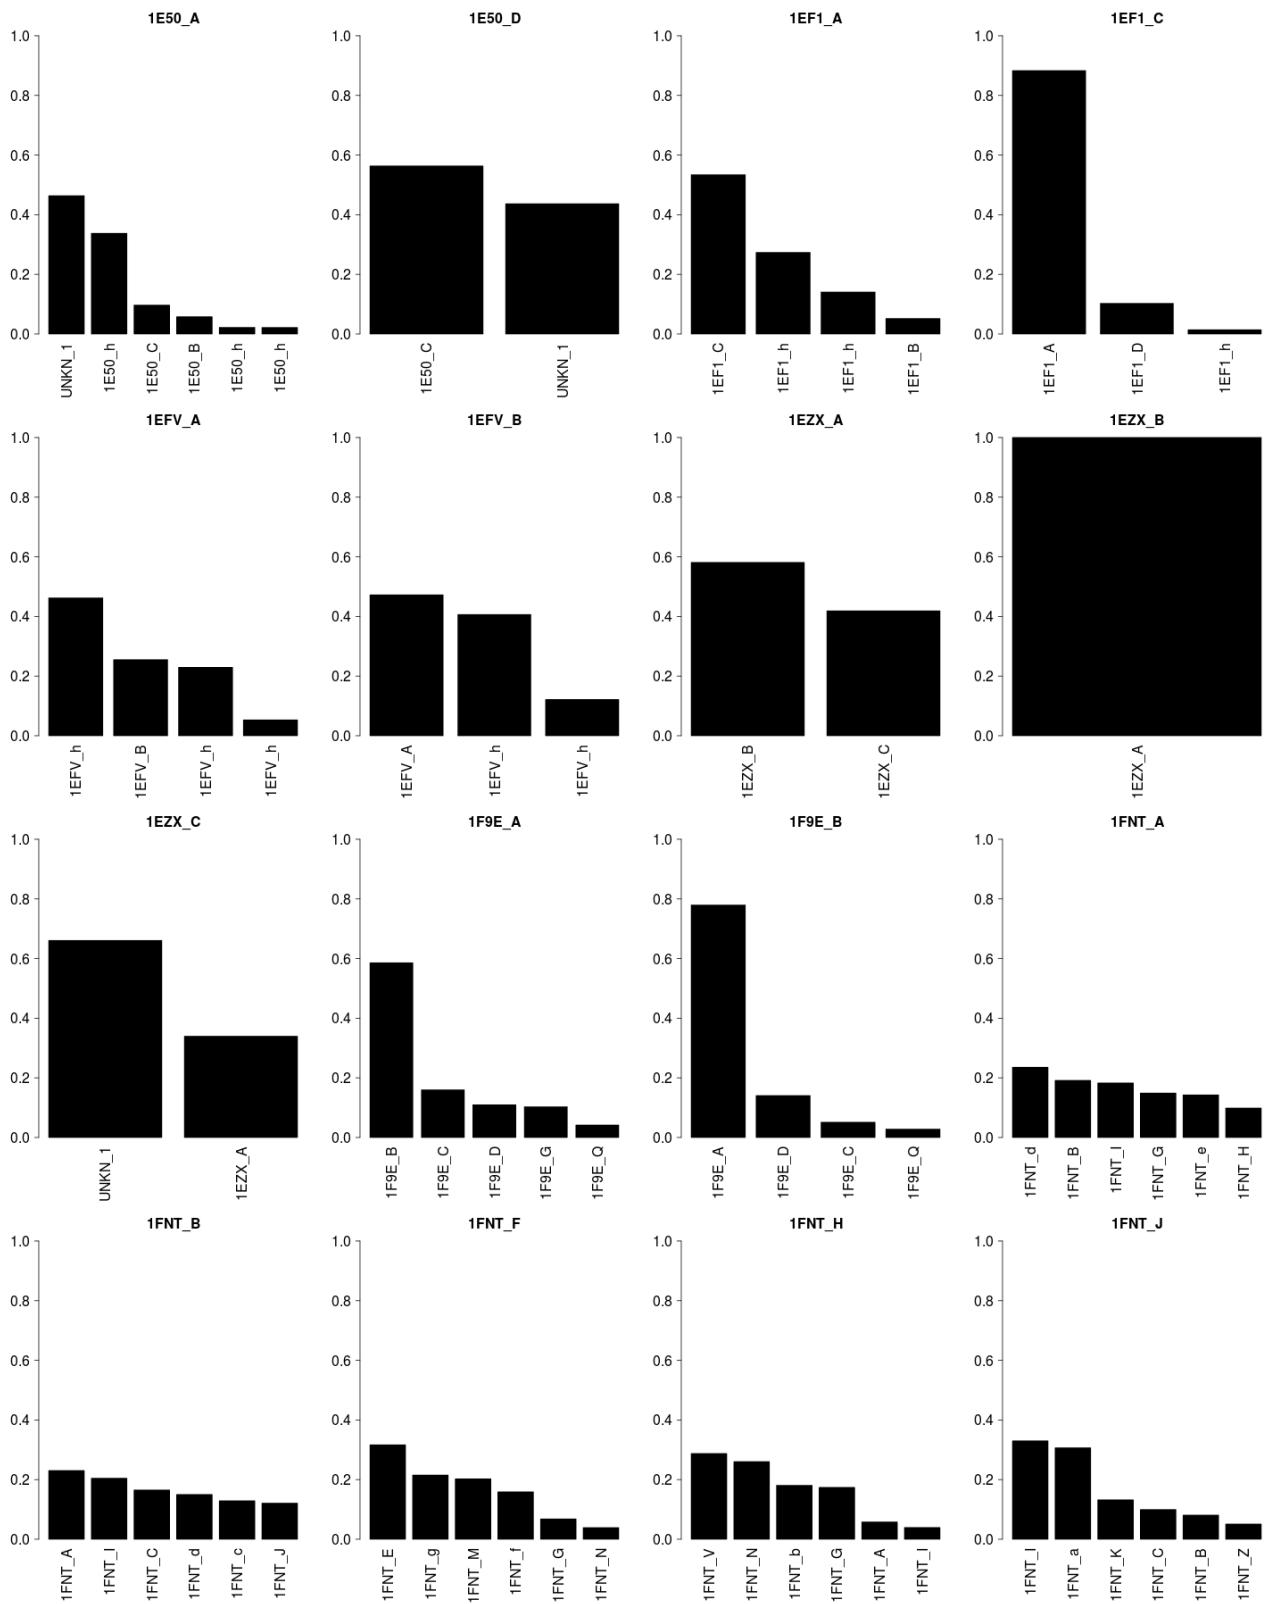

**B**  
**Figure S13** (continued next page)

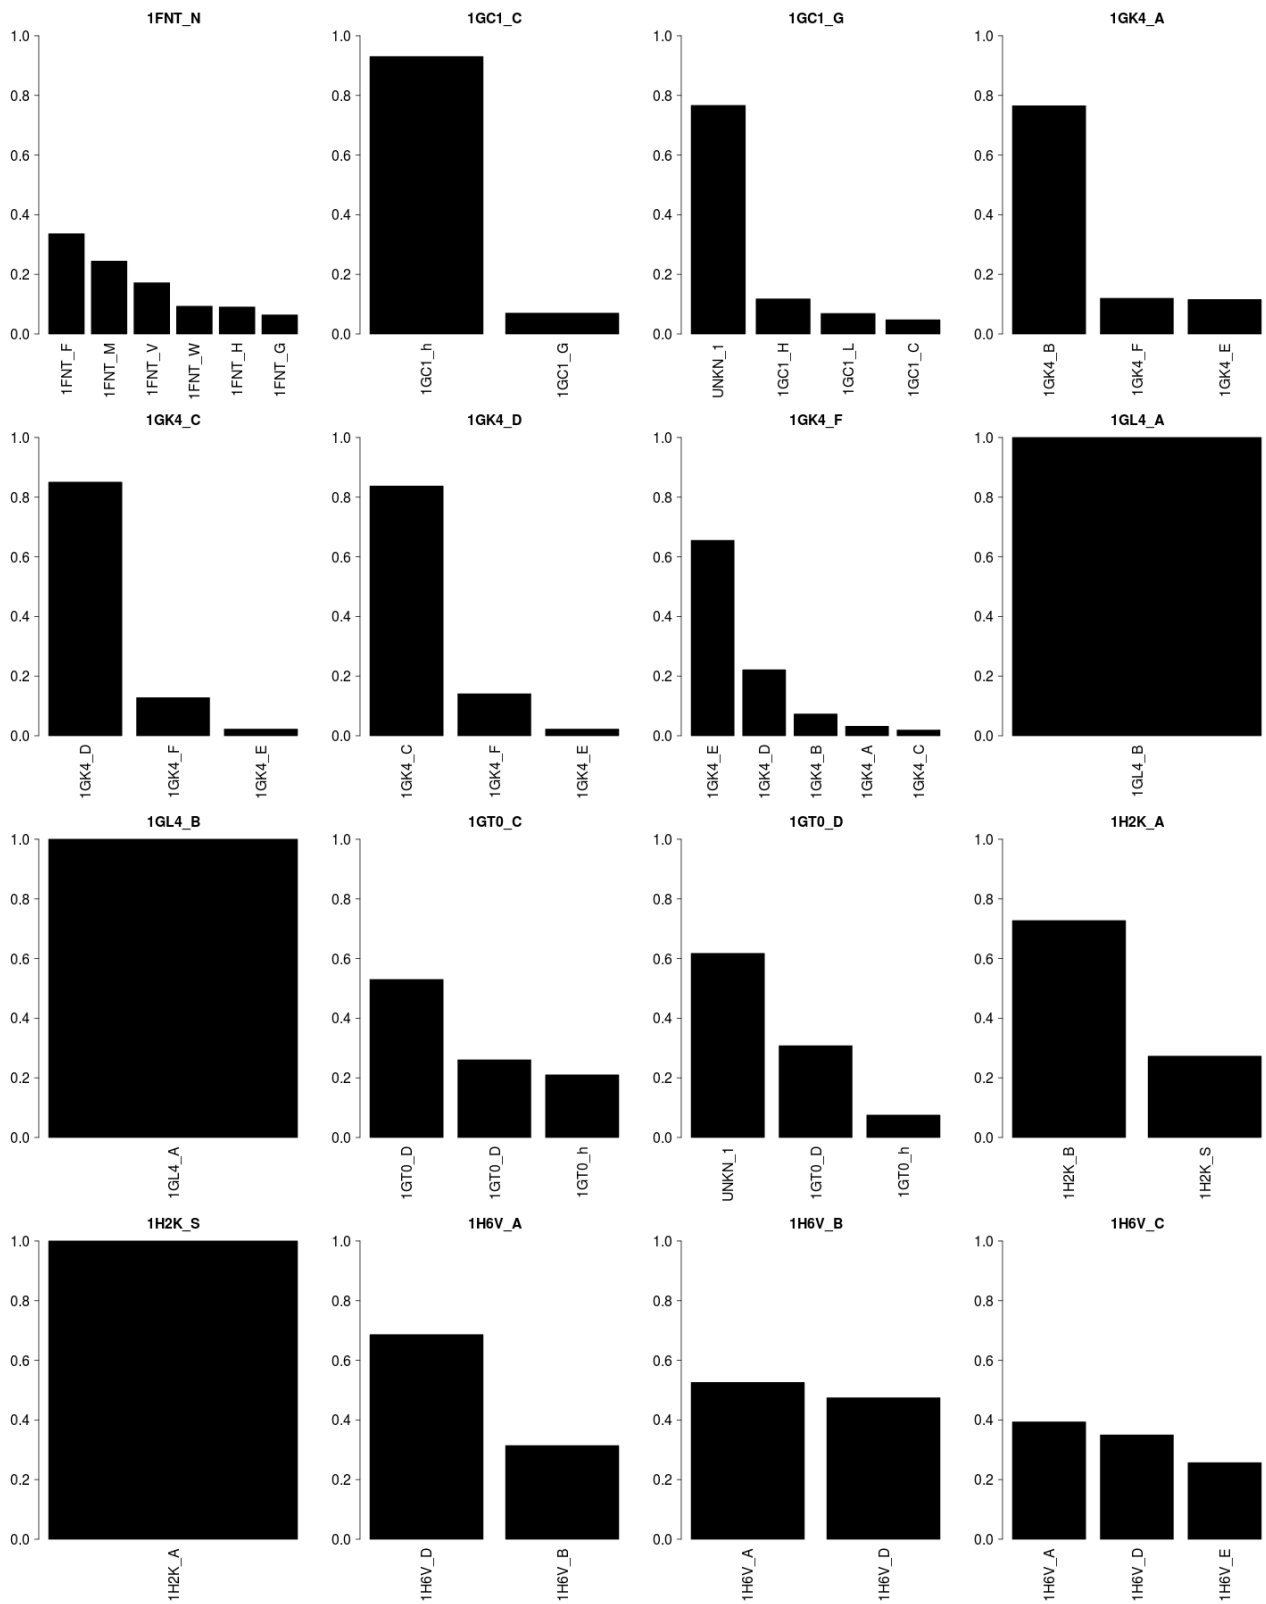

**C**  
**Figure S13** (continued next page)

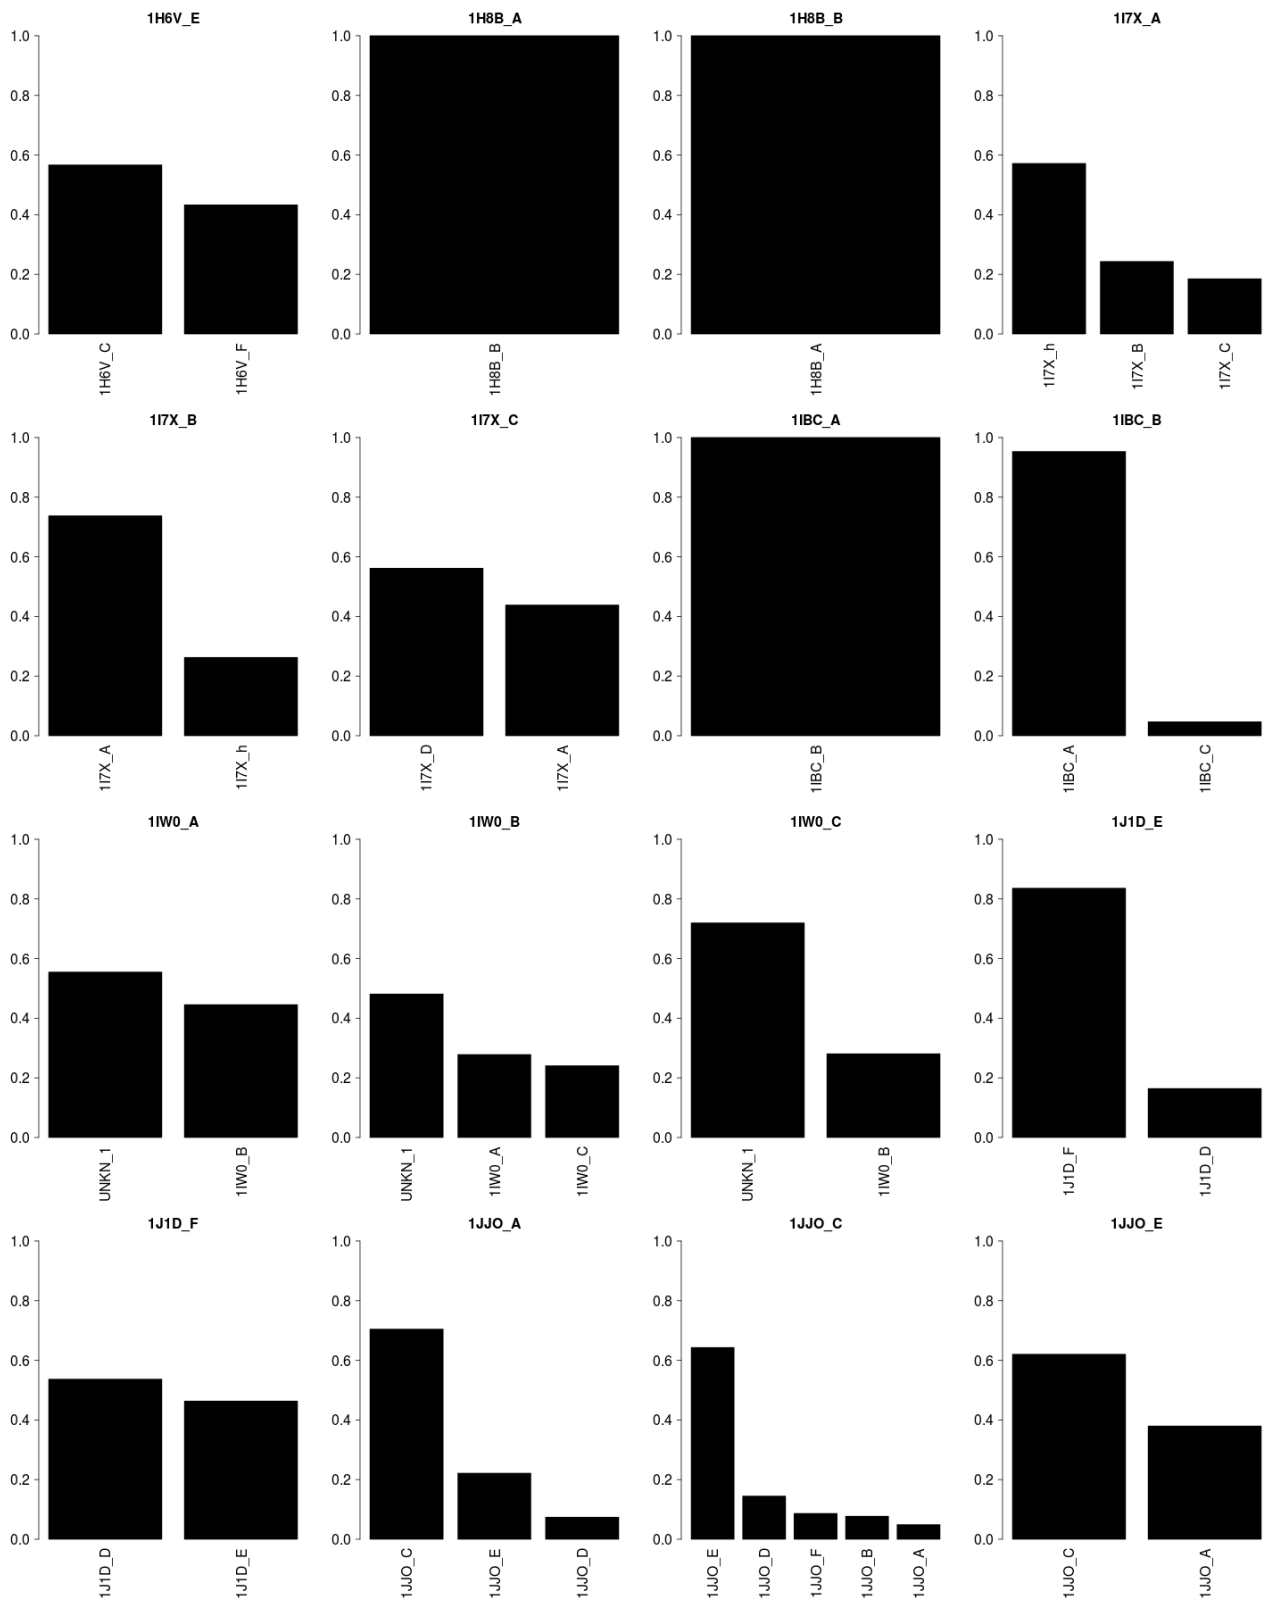

D  
**Figure S13** (continued next page)

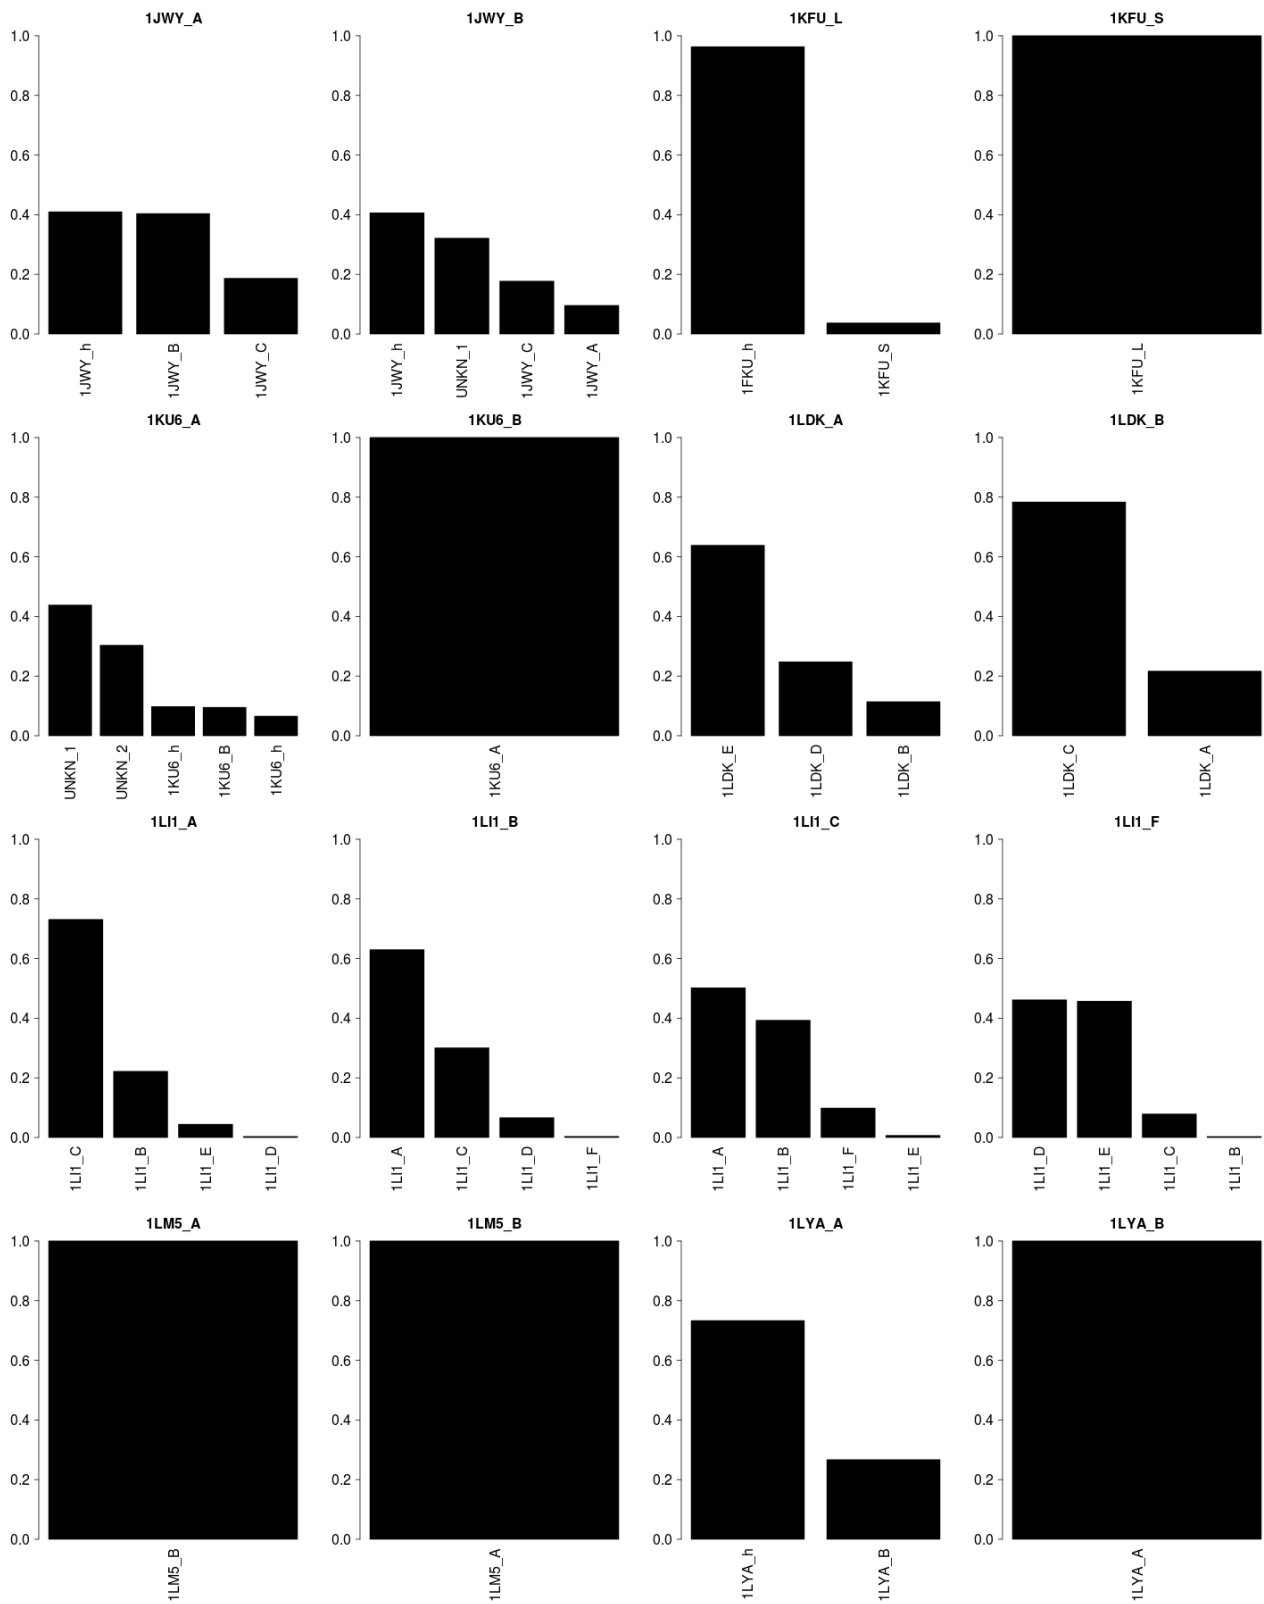

E  
**Figure S13** (continued next page)

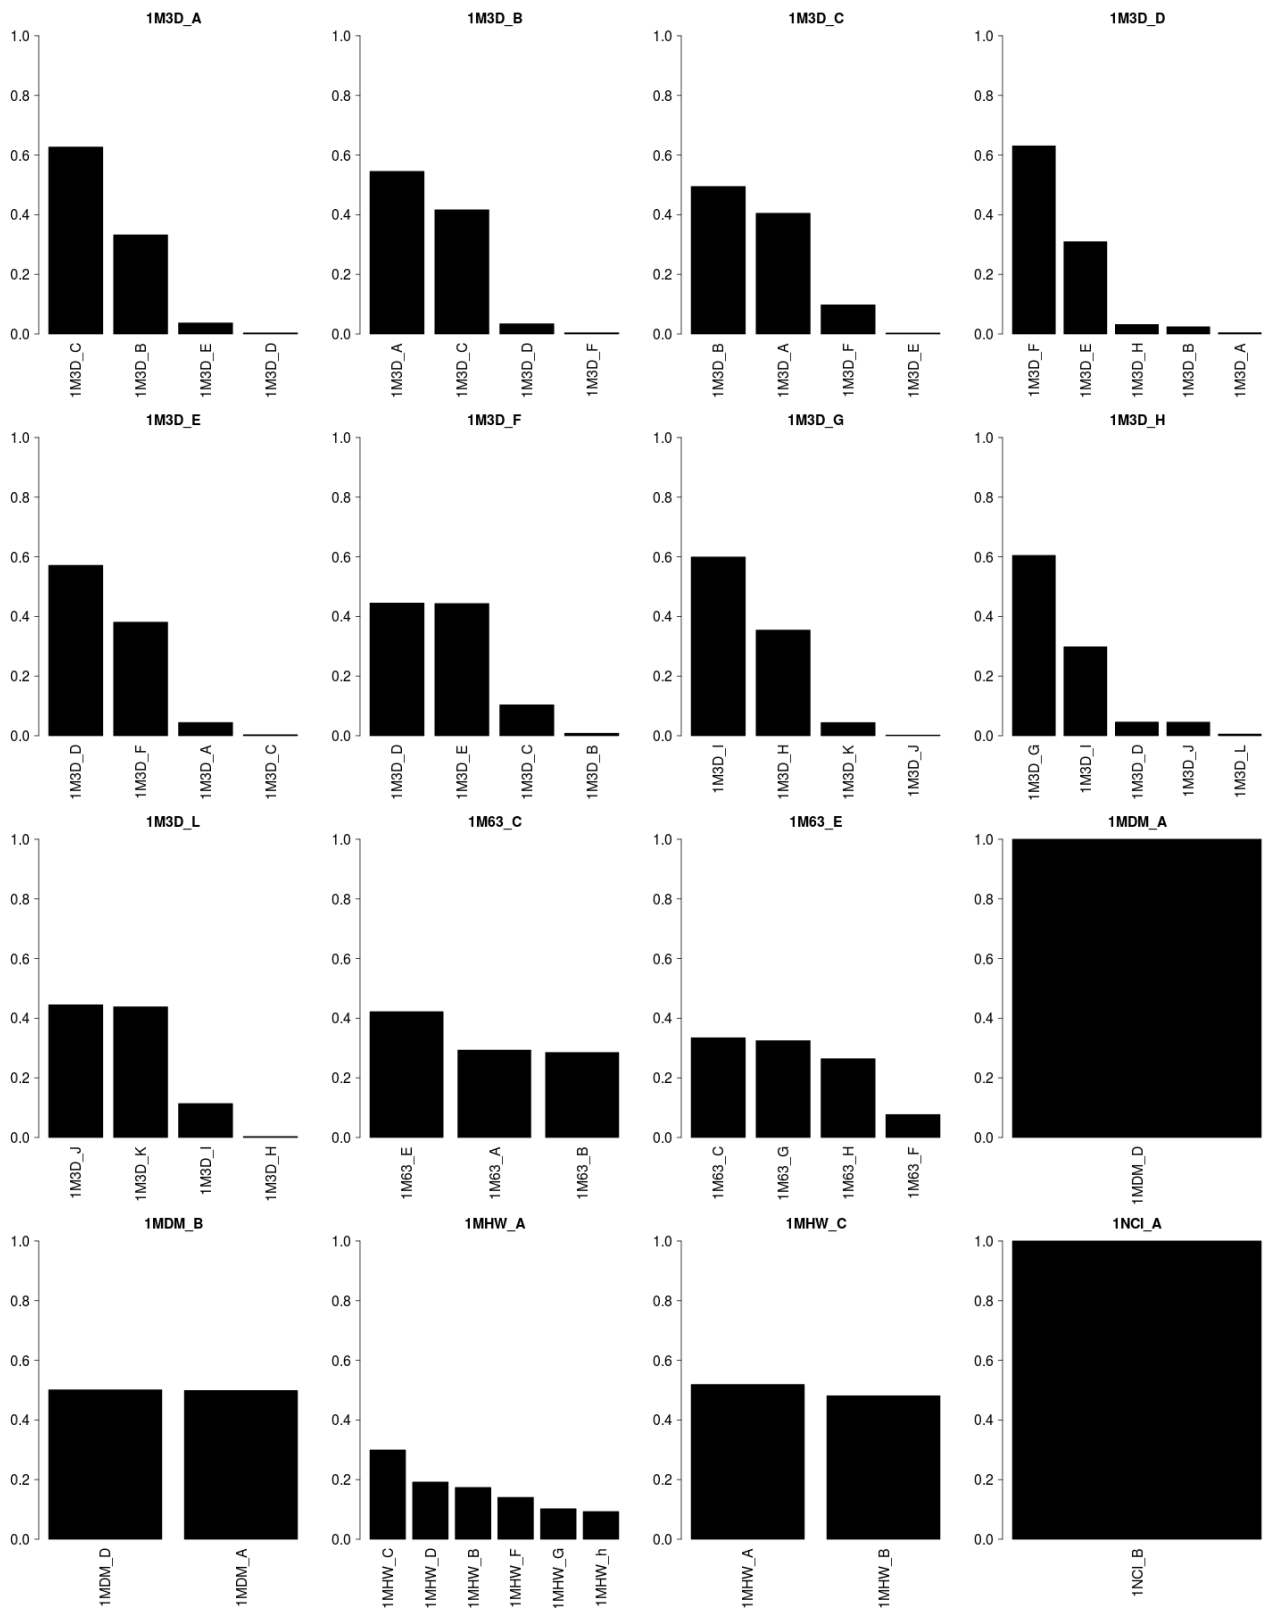

F  
**Figure S13** (continued next page)

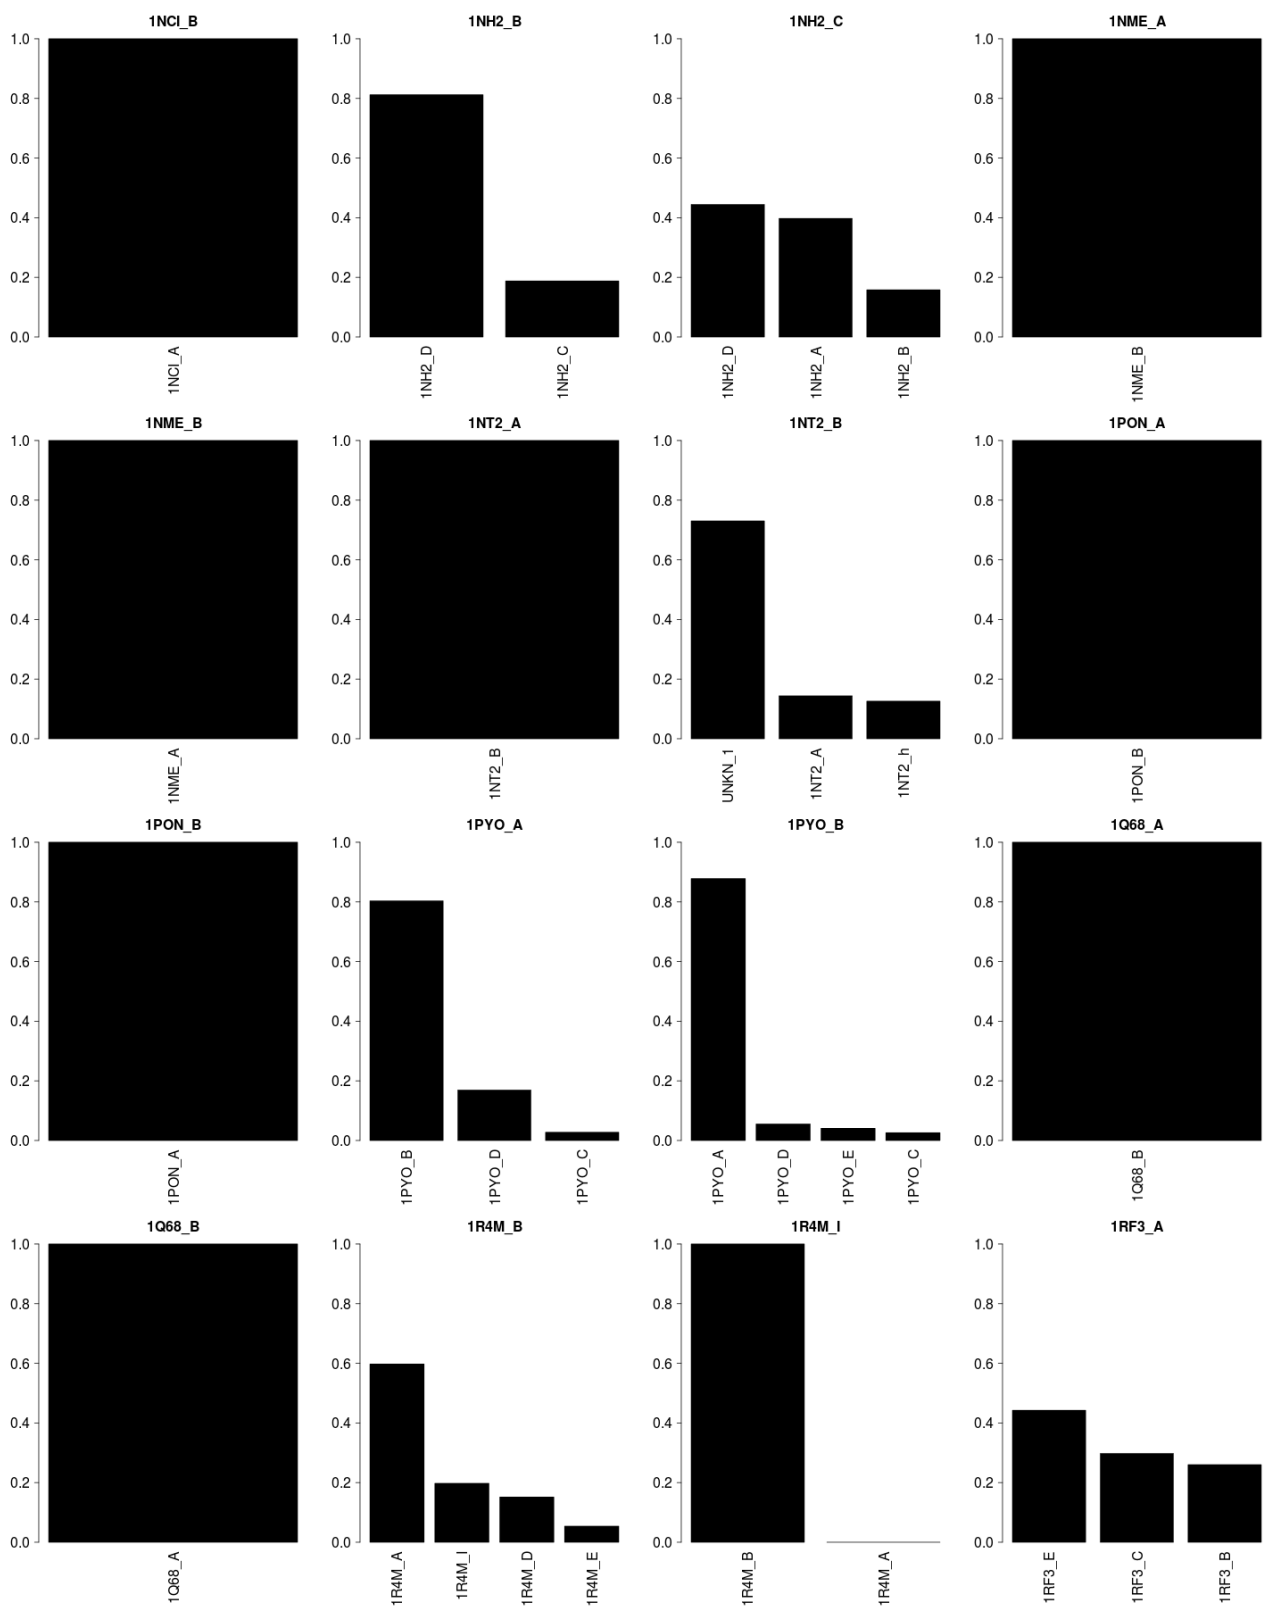

**G**  
**Figure S13** (continued next page)



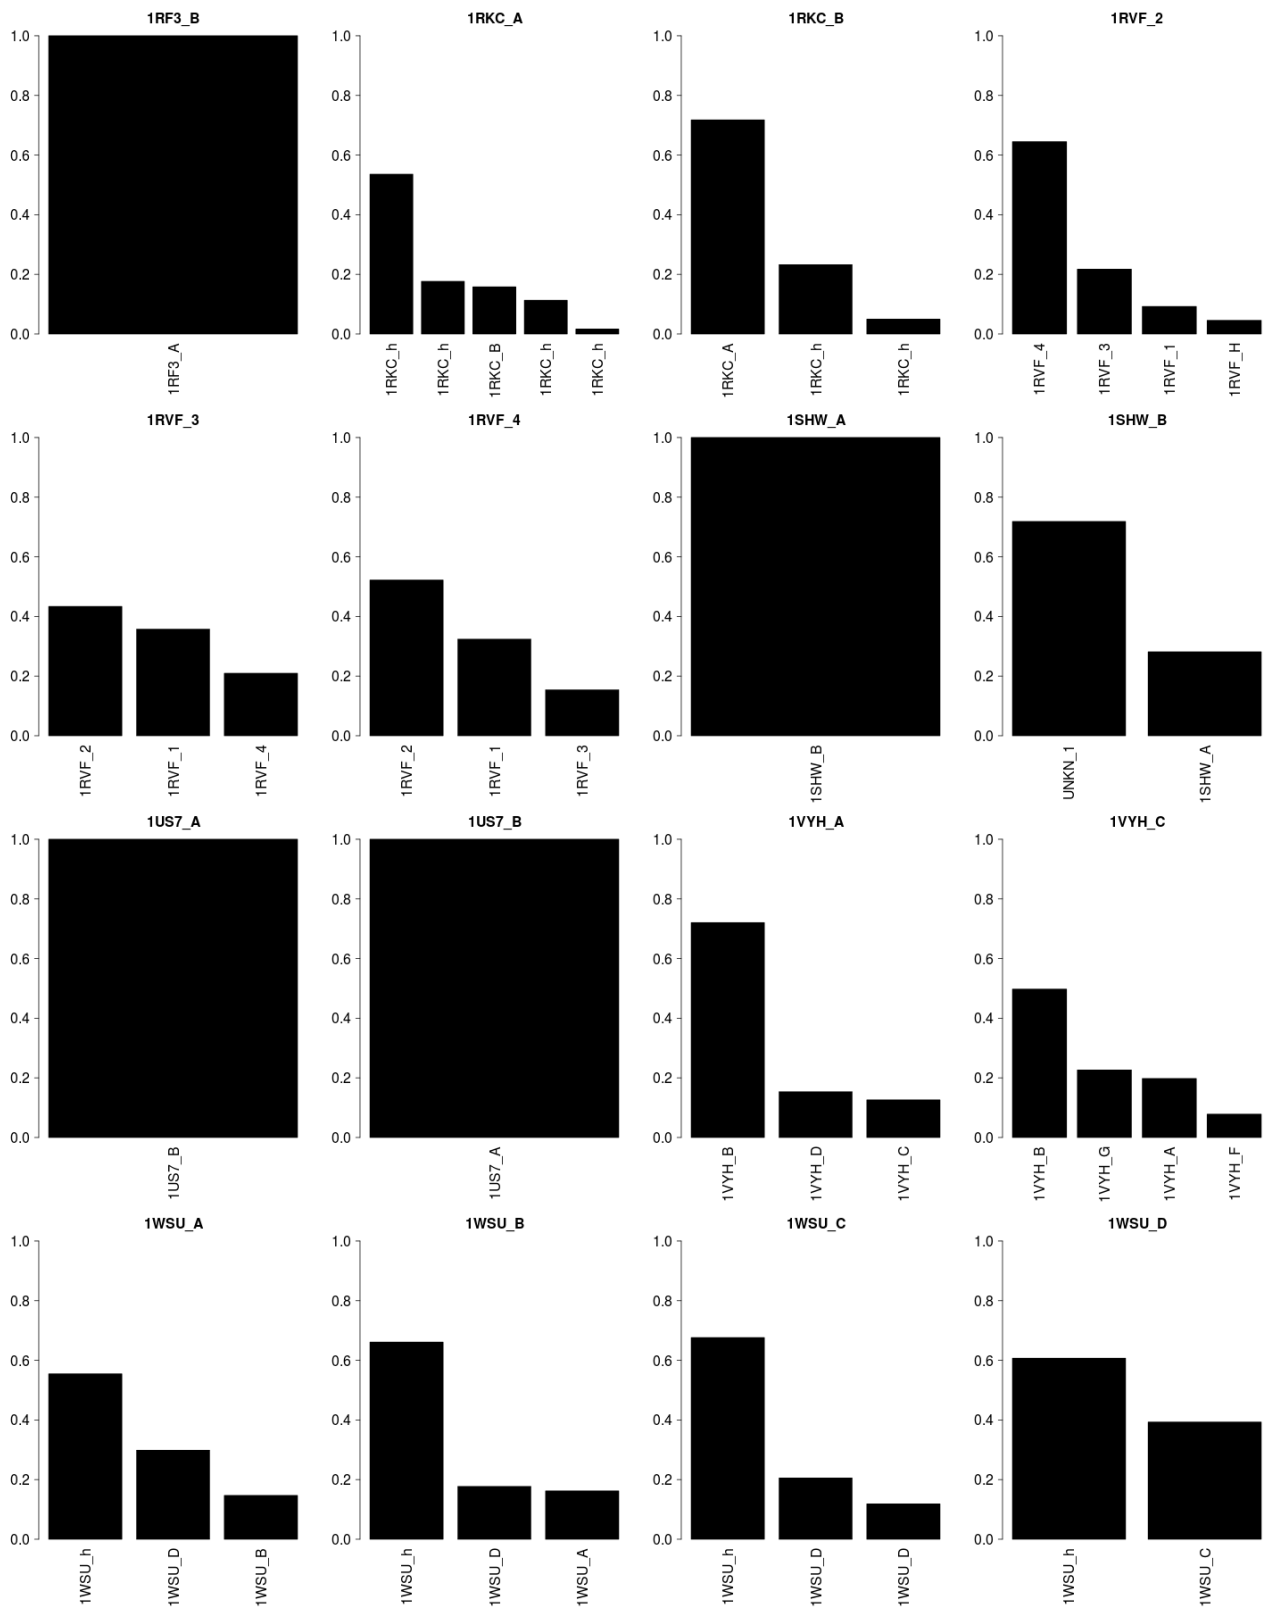

H  
**Figure S13** (continued next page)

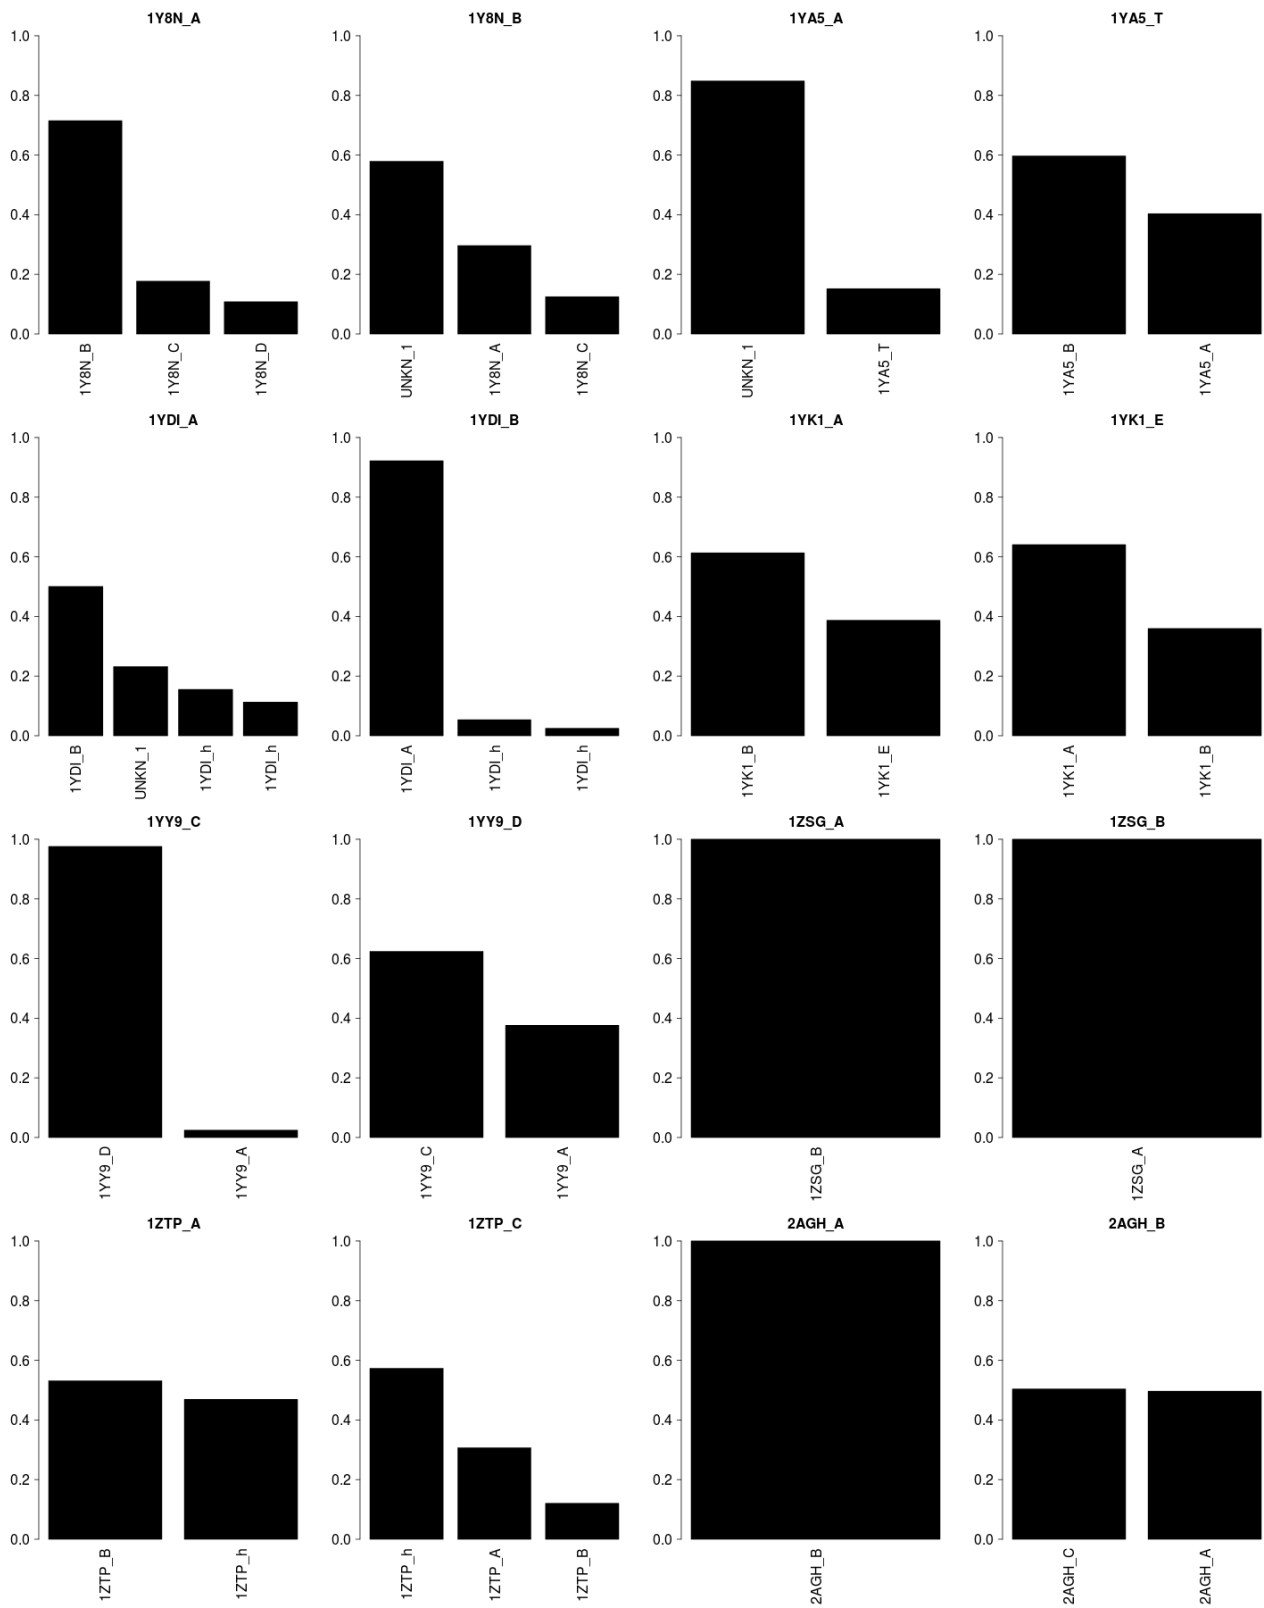

I  
**Figure S13** (continued next page)

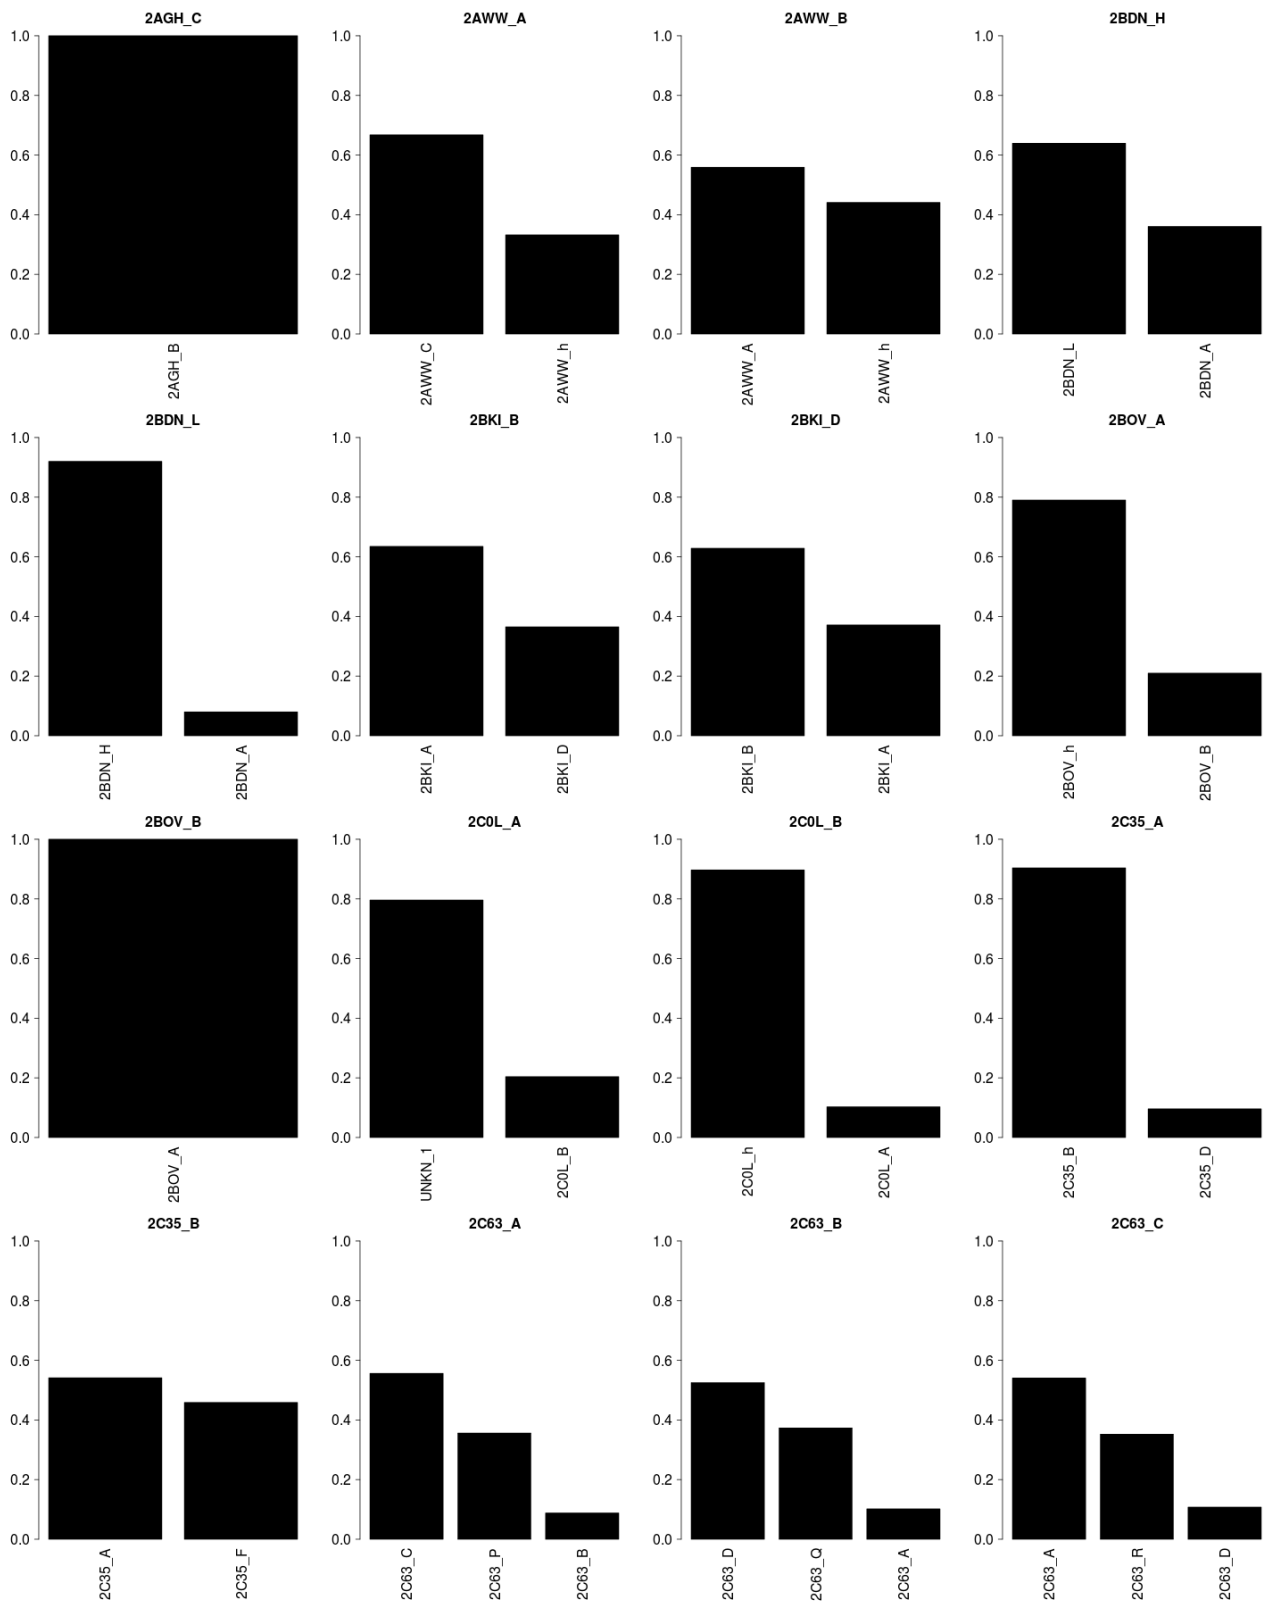

**J**  
**Figure S13** (continued next page)

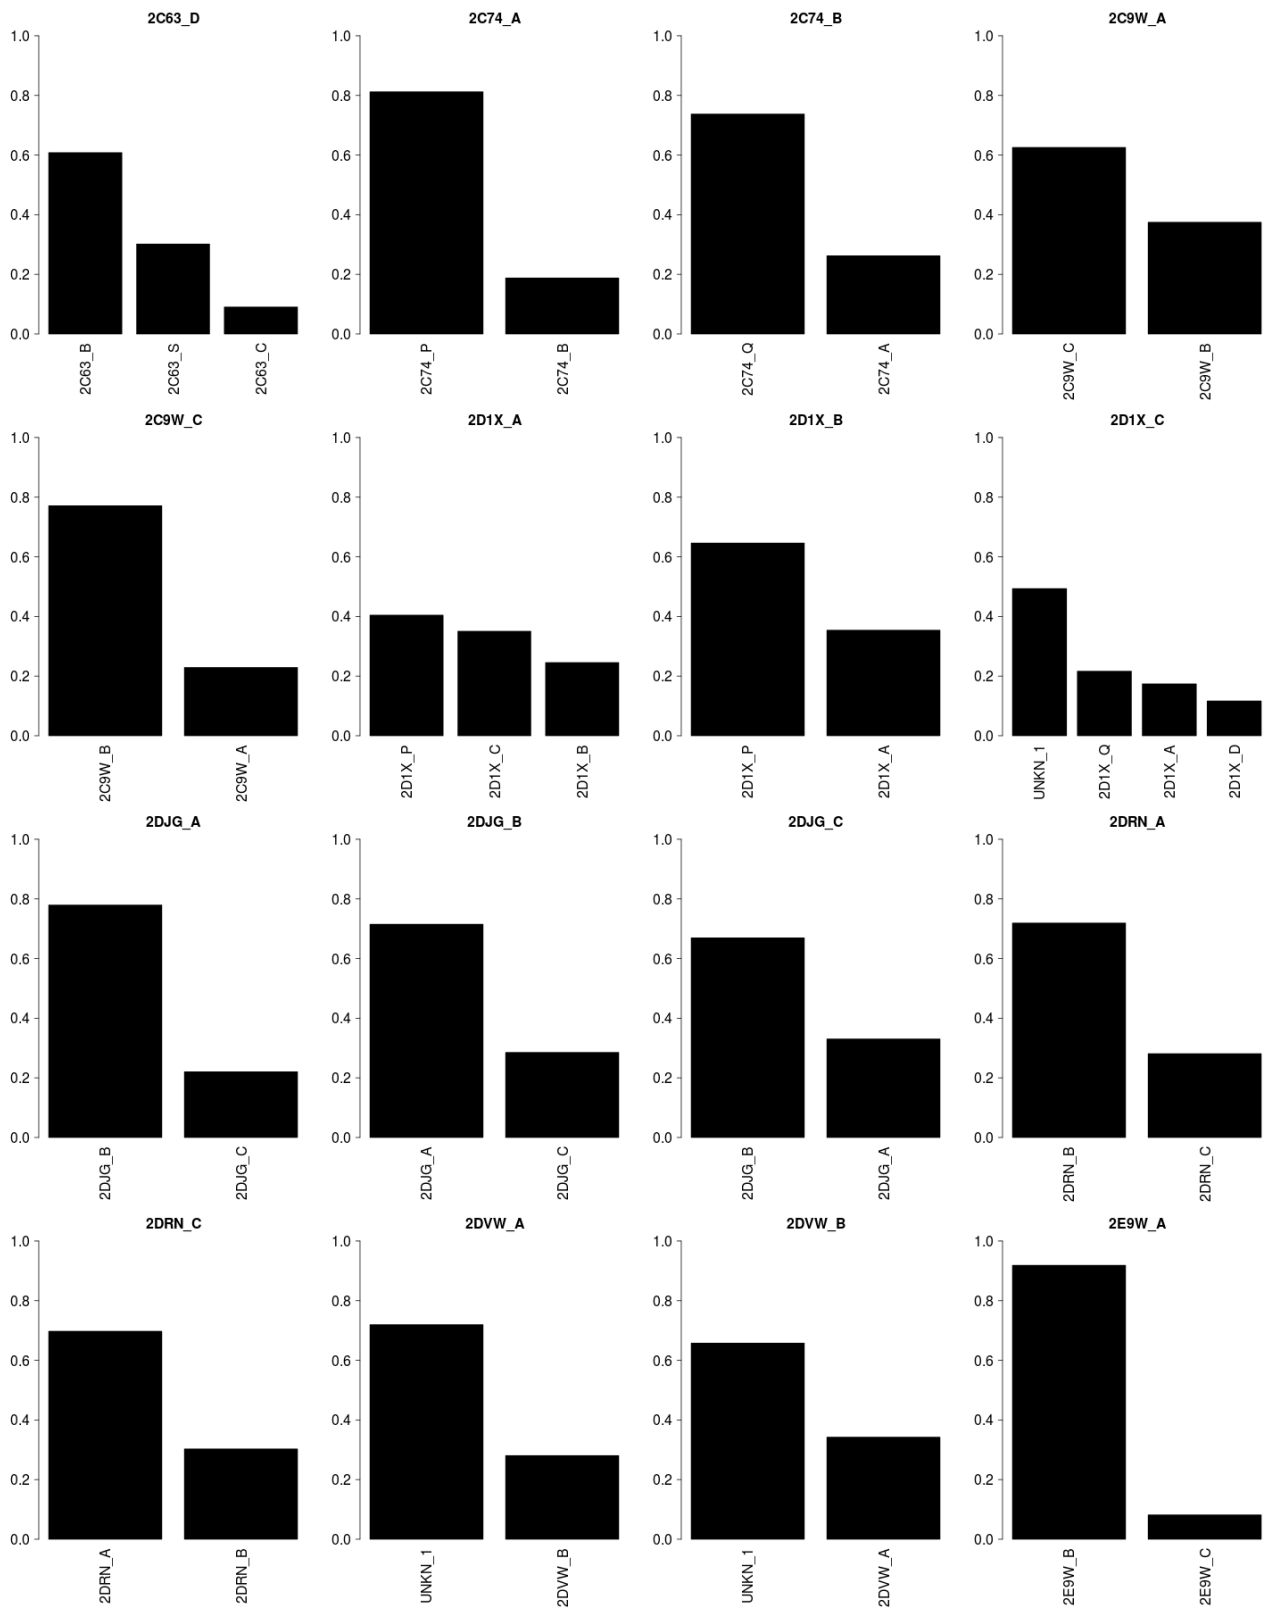

**K**  
**Figure S13** (continued next page)

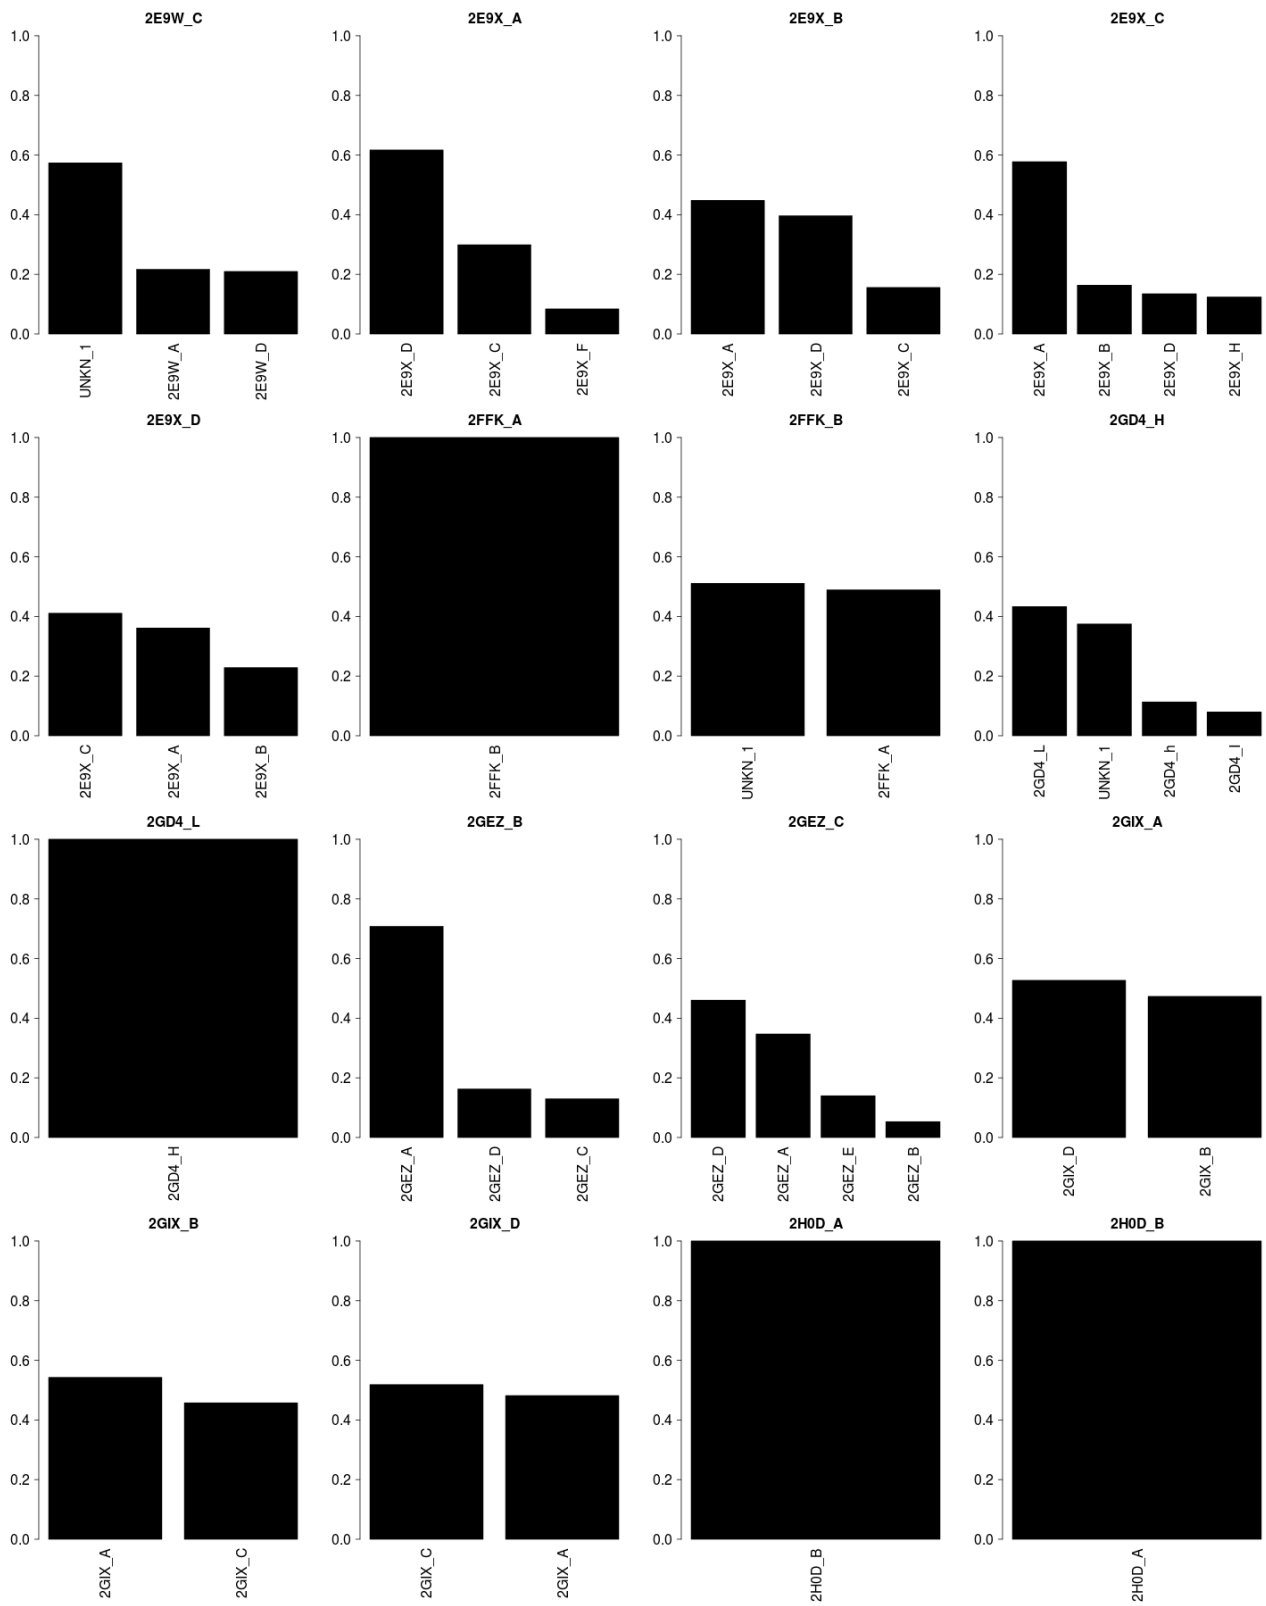

L  
**Figure S13** (continued next page)

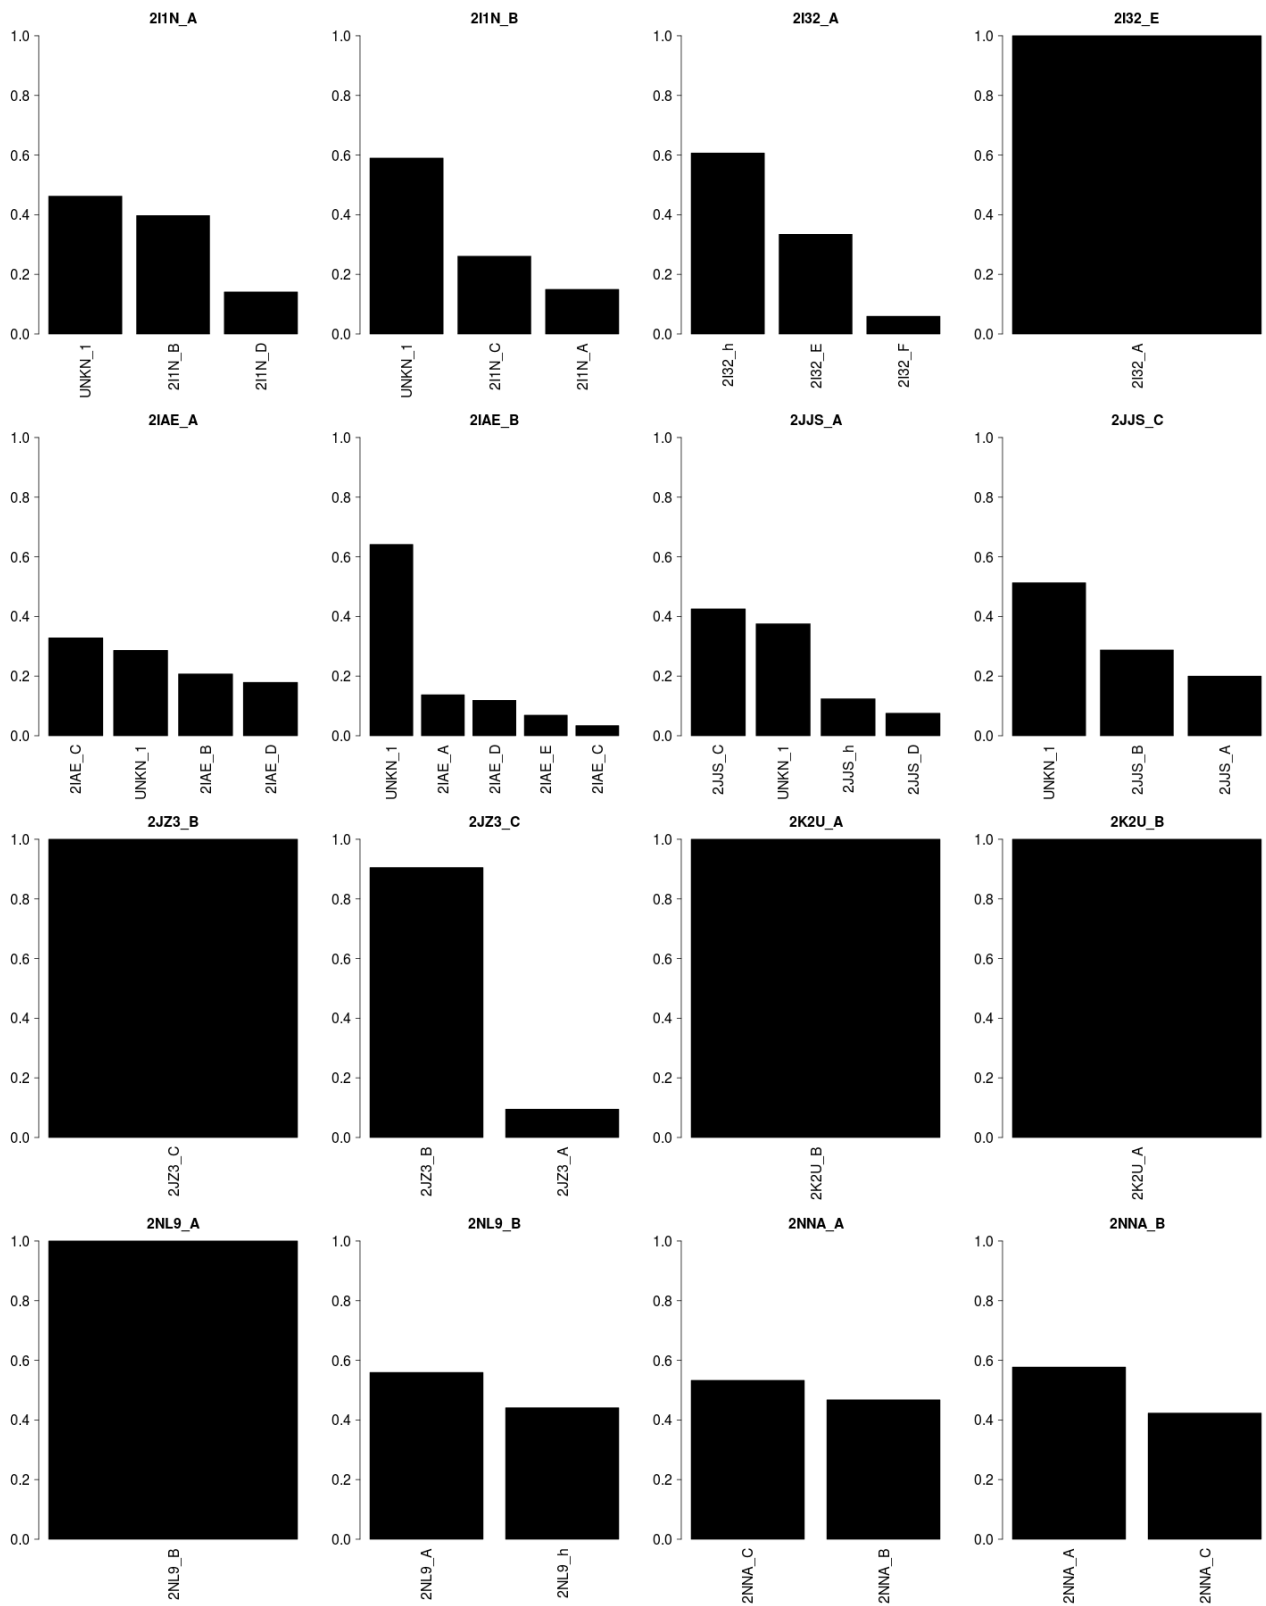

M  
**Figure S13** (continued next page)

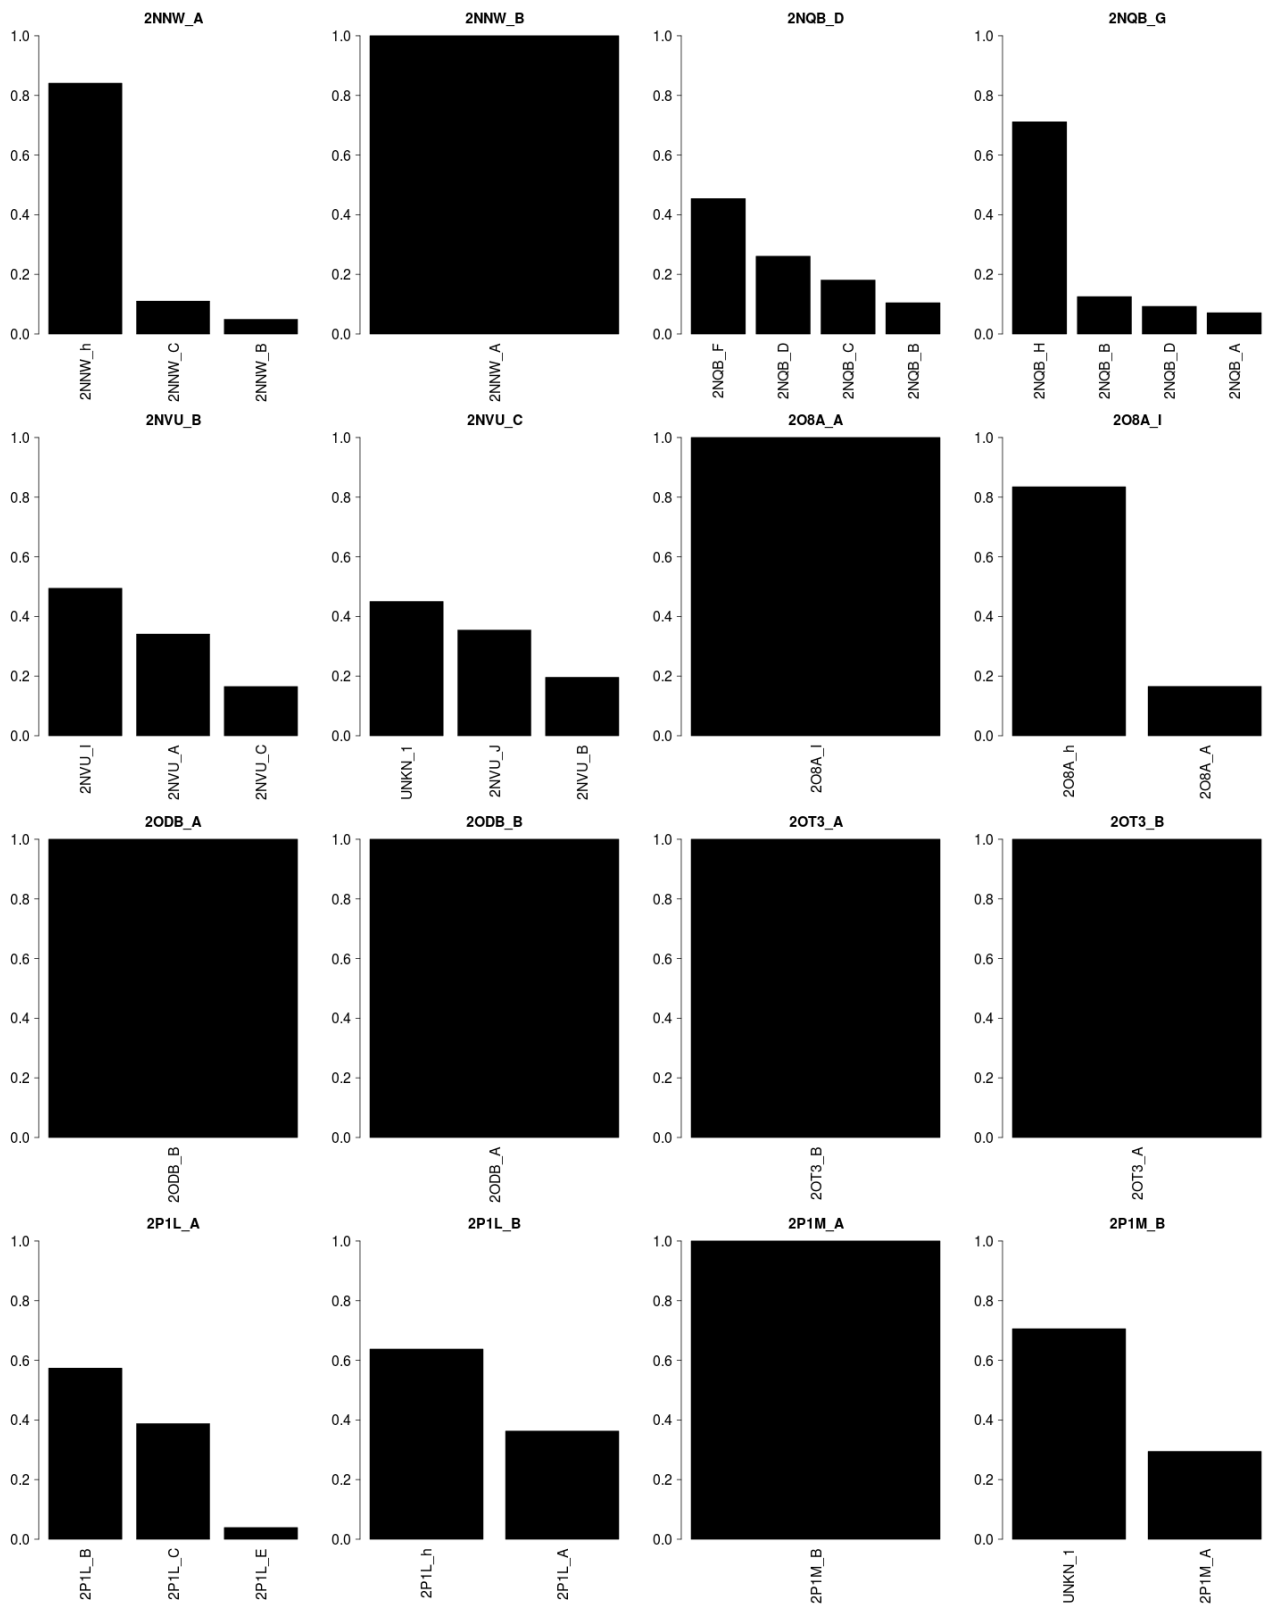

N  
**Figure S13** (continued next page)

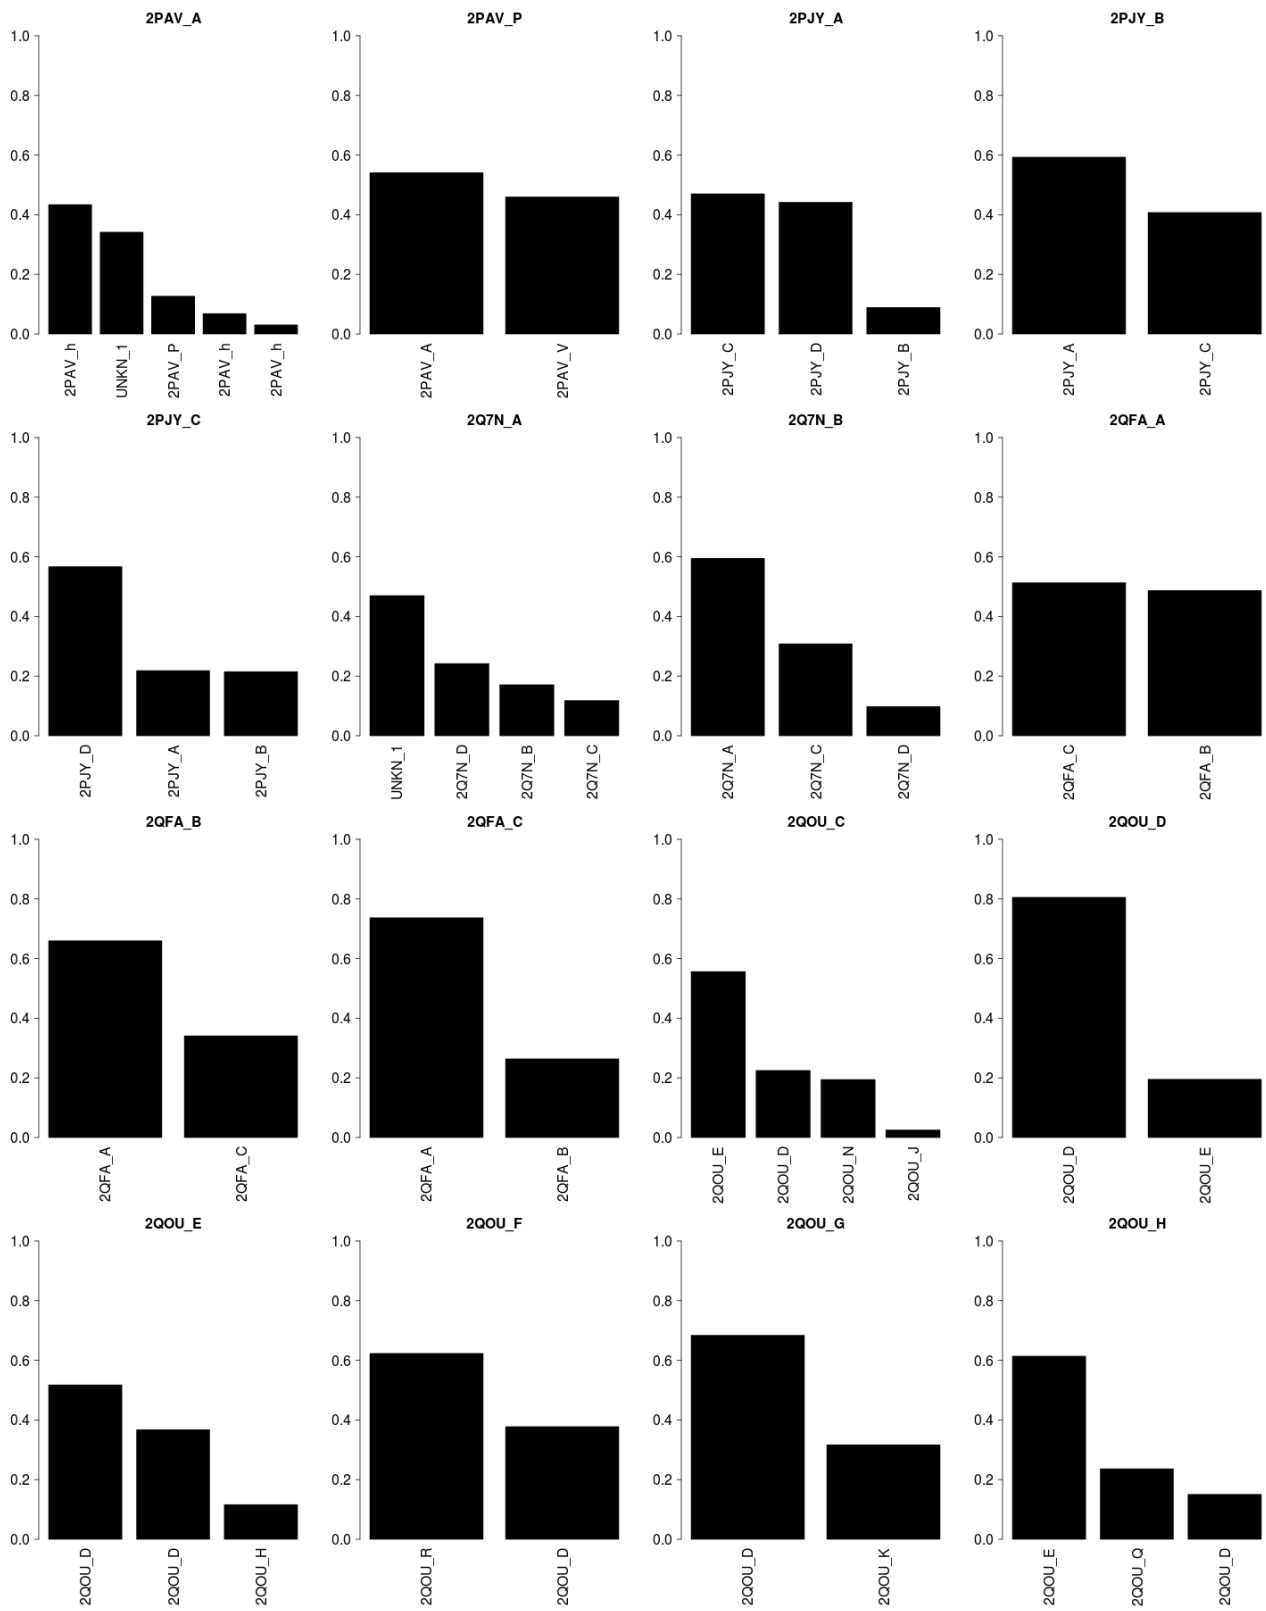

O  
**Figure S13** (continued next page)



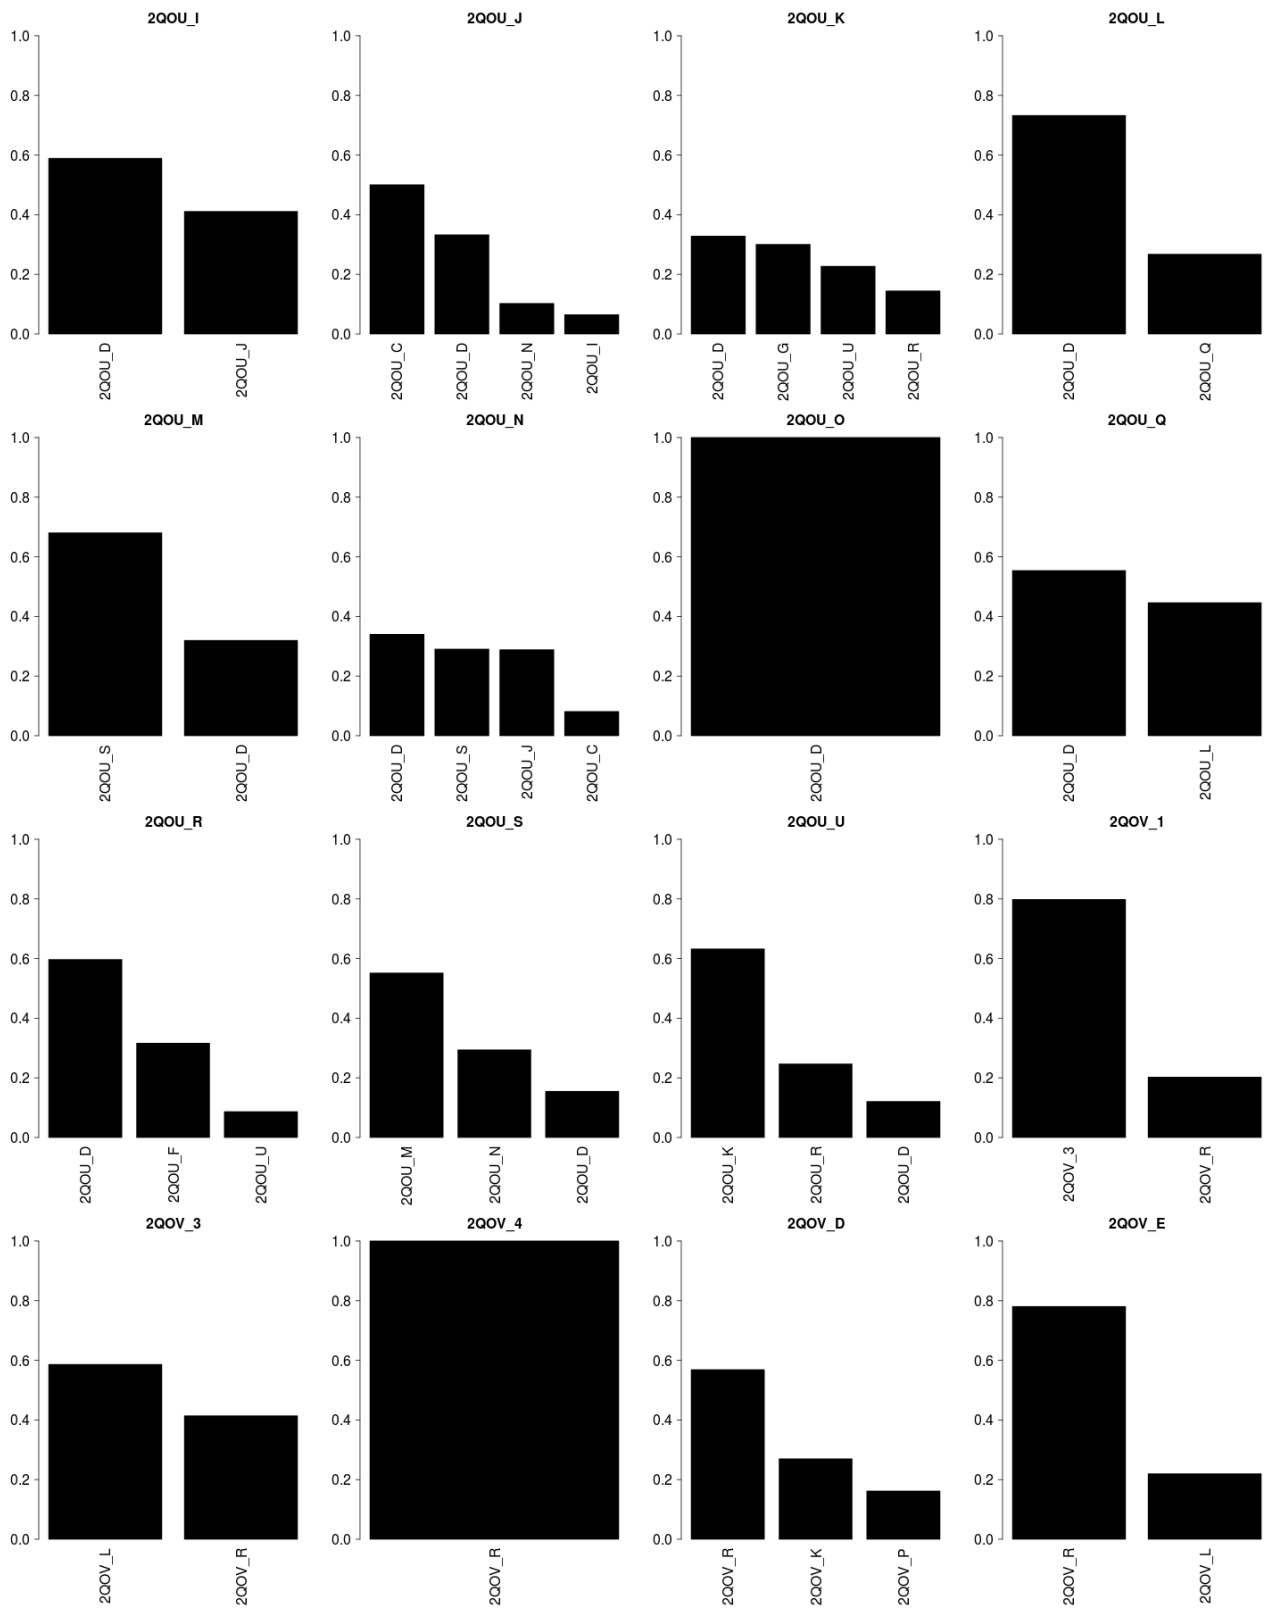

**P**  
**Figure S13** (continued next page)

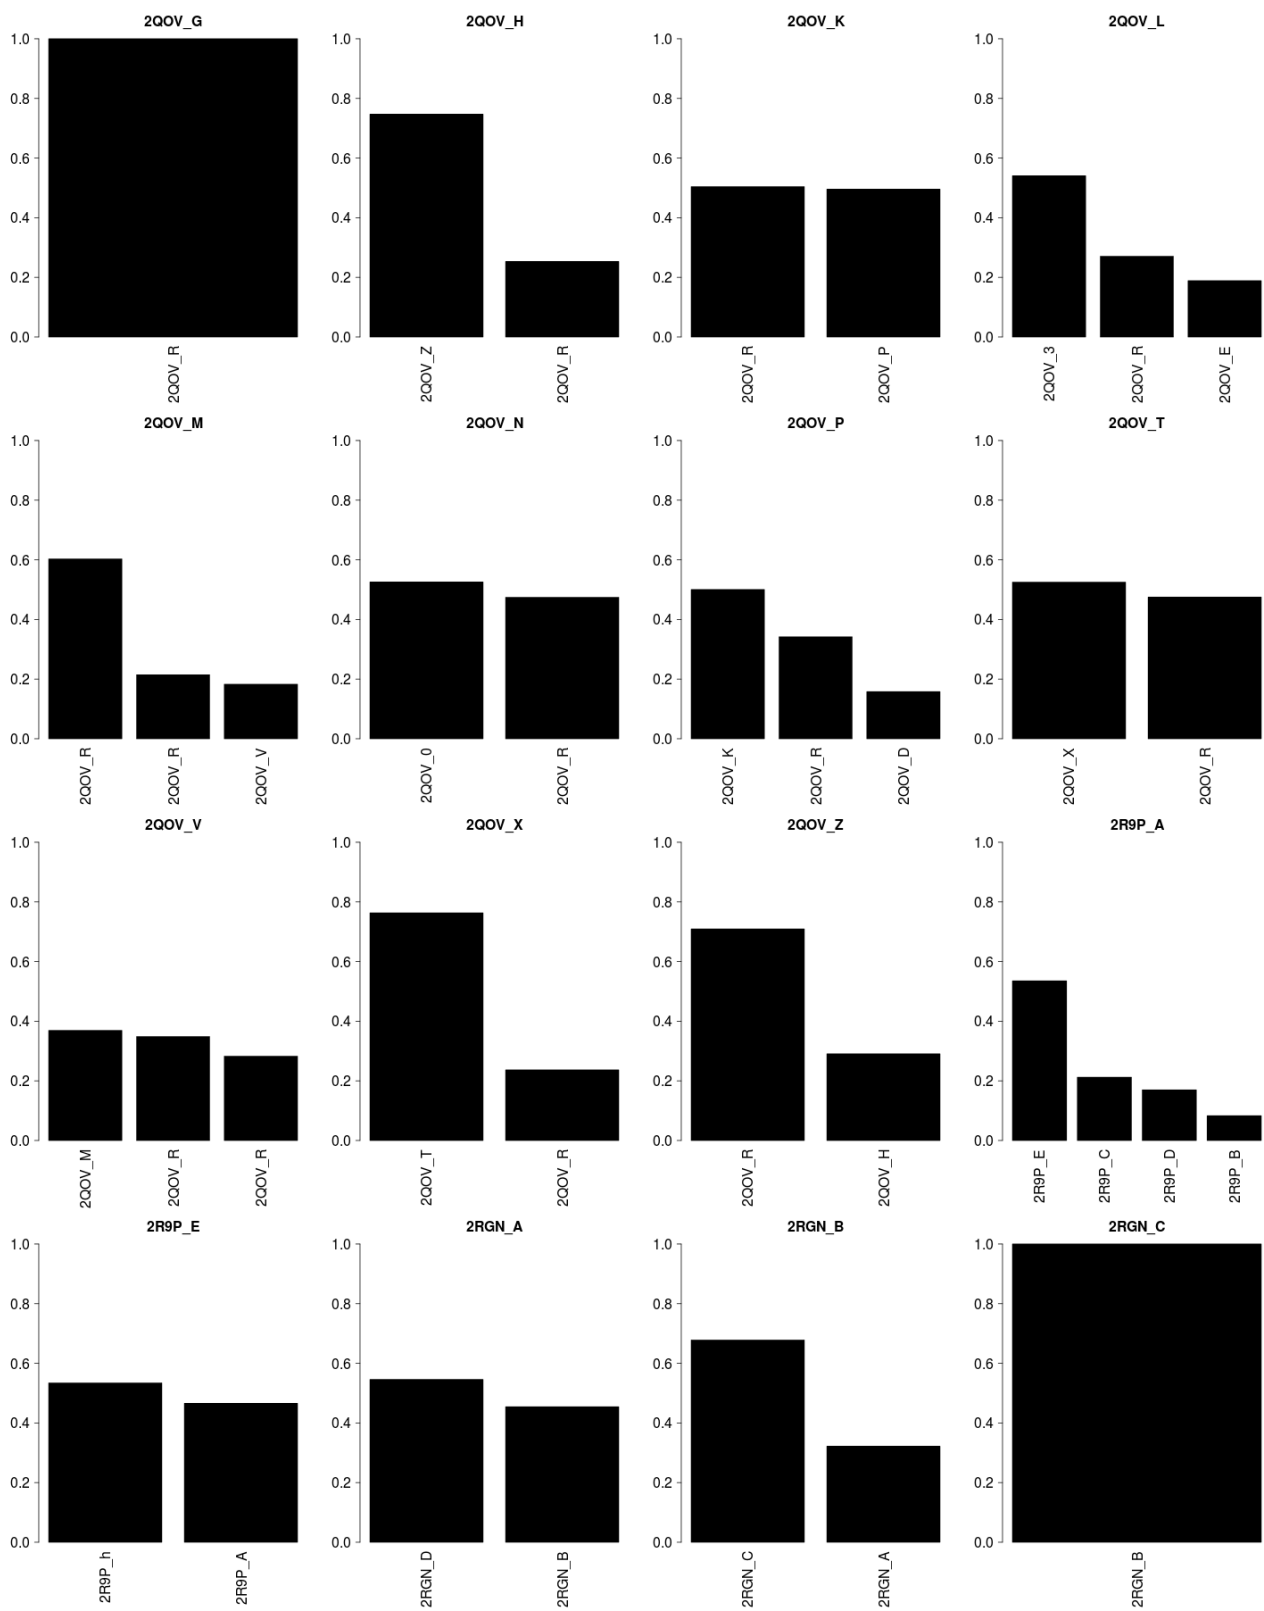

Q  
**Figure S13** (continued next page)

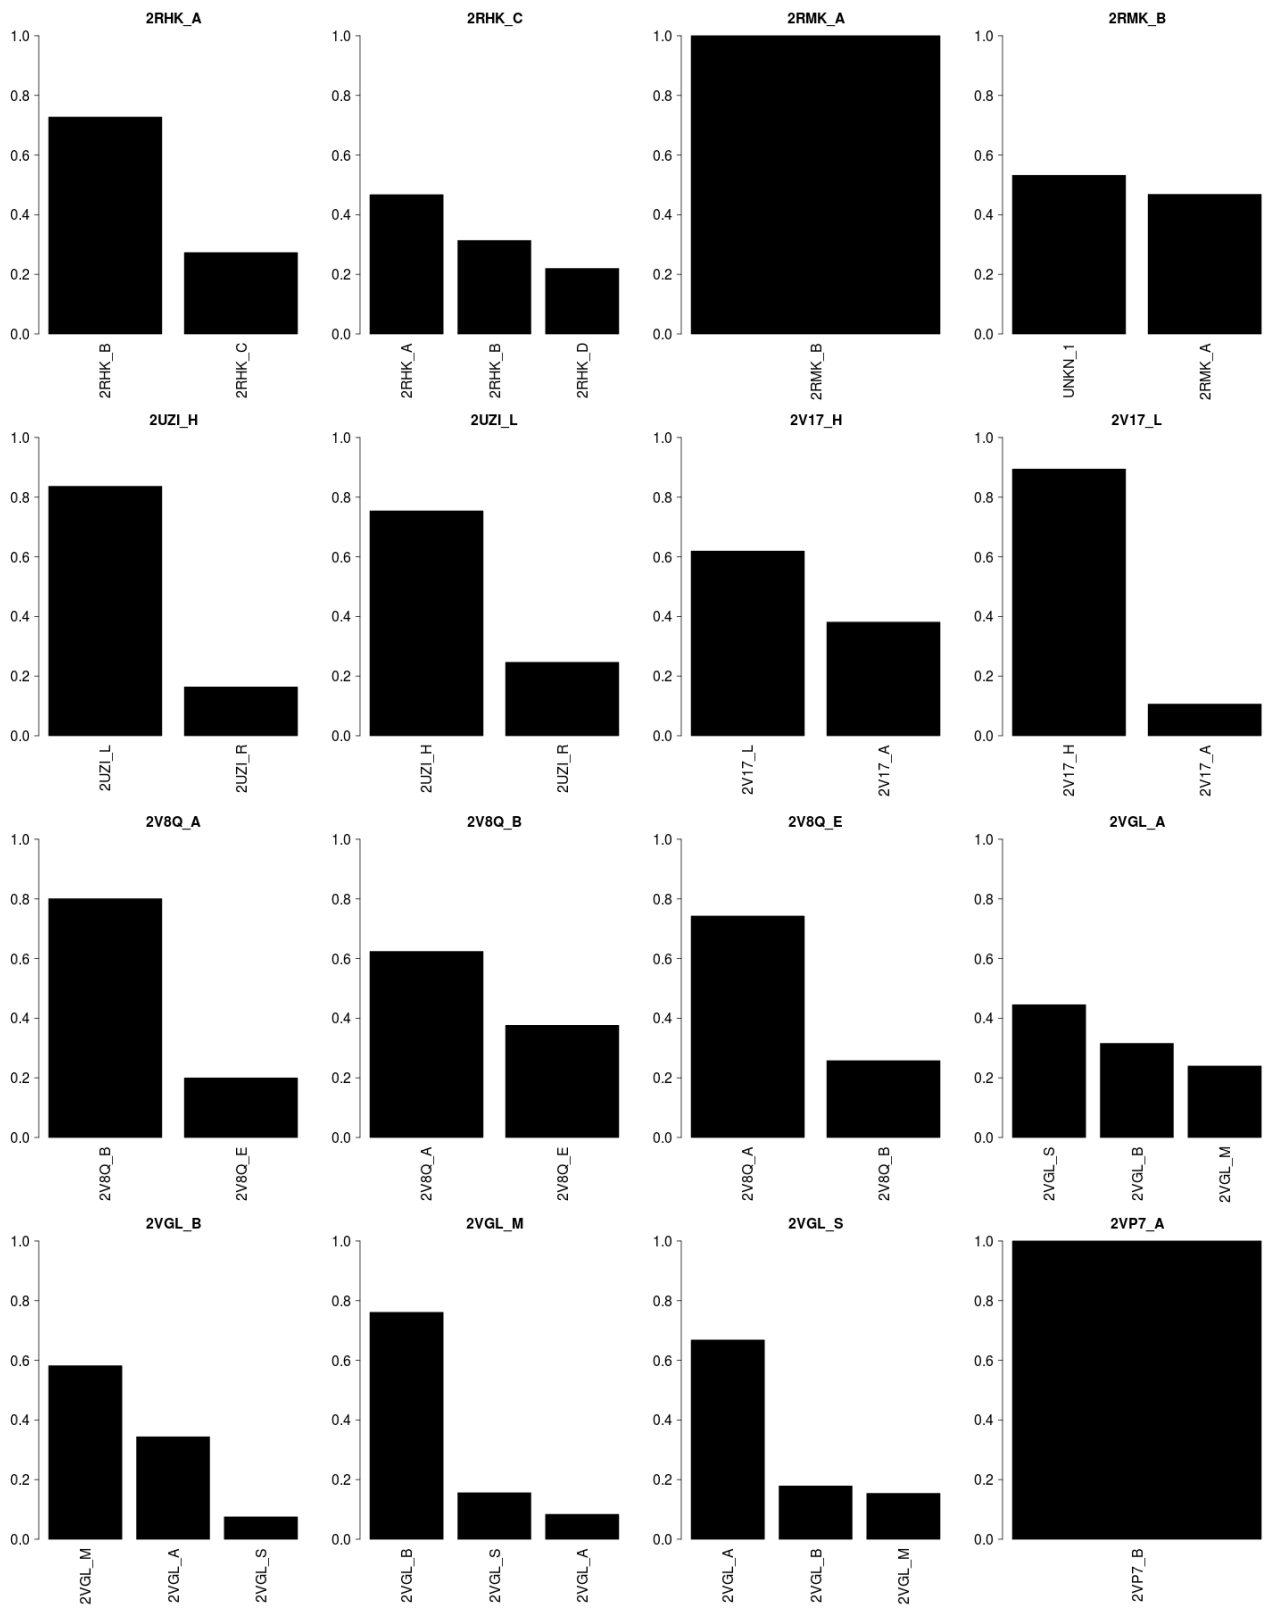

R  
**Figure S13** (continued next page)

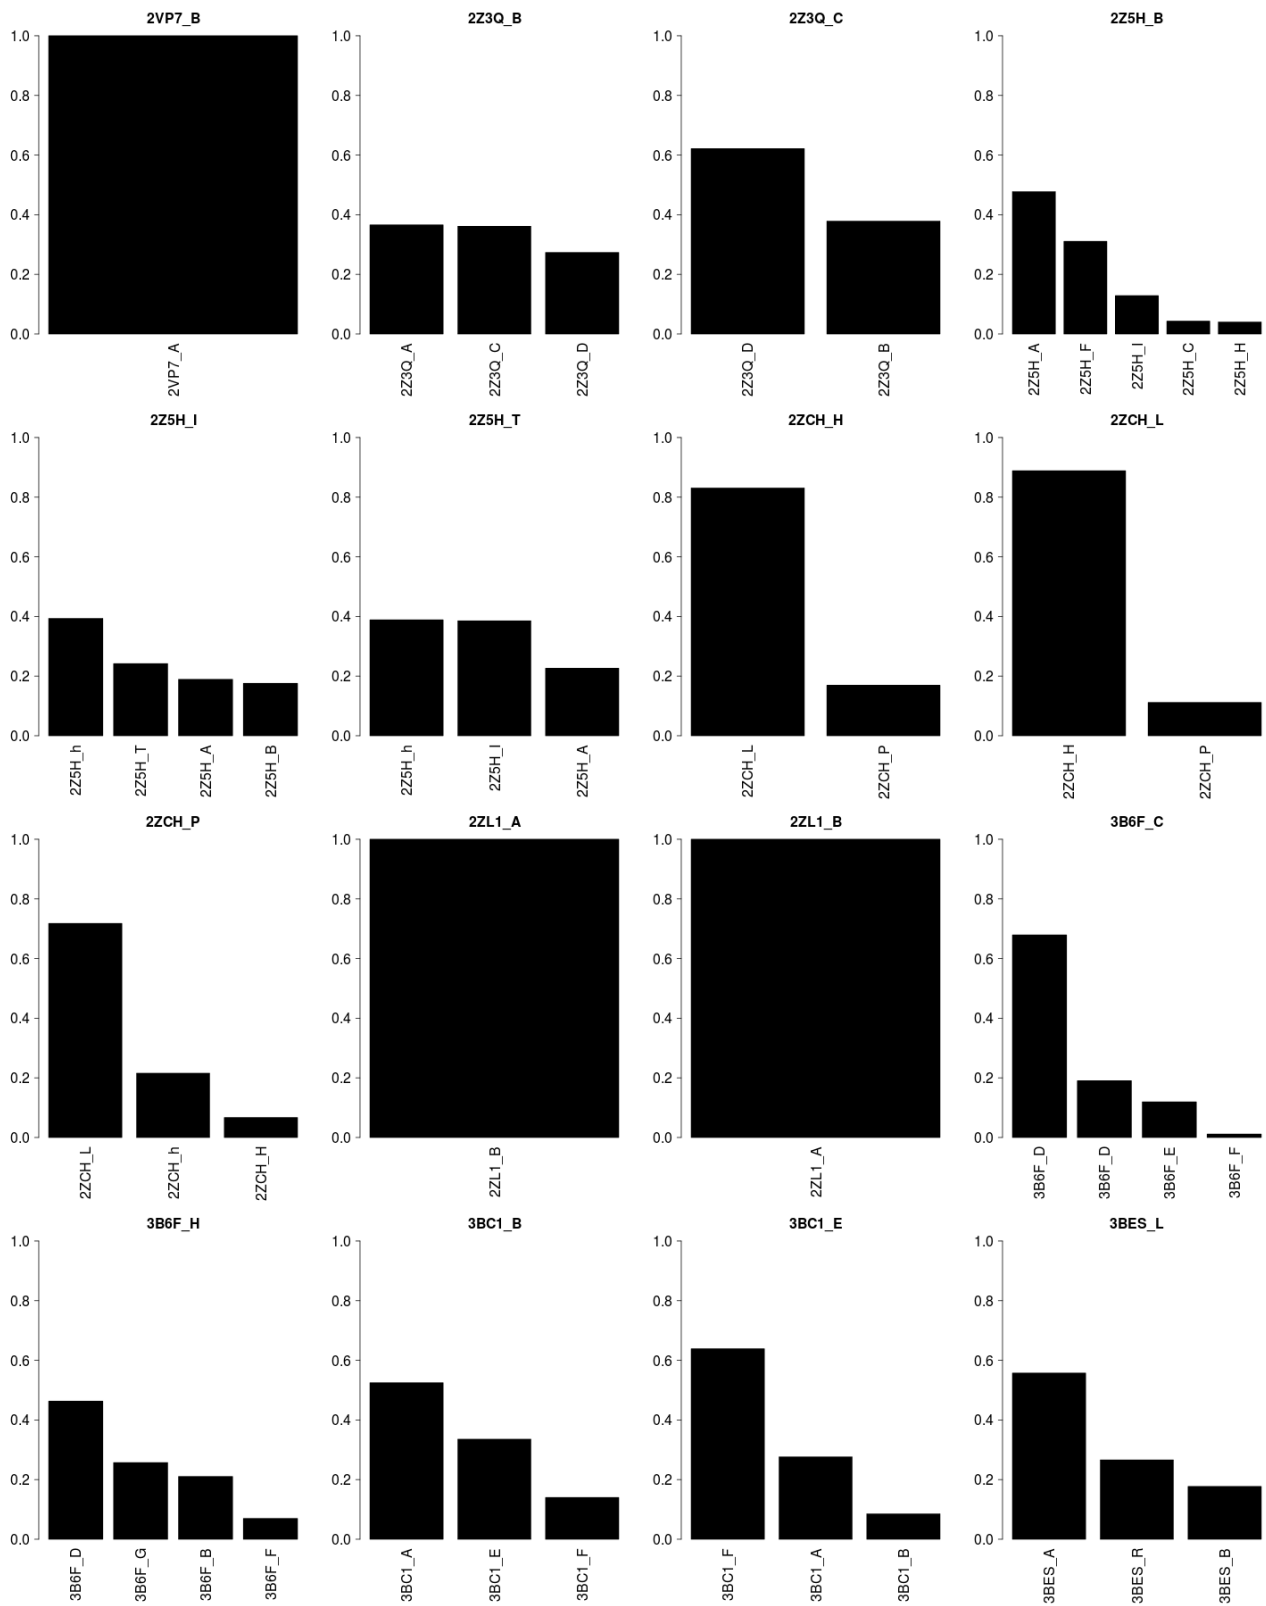

**S**  
**Figure S13** (continued next page)

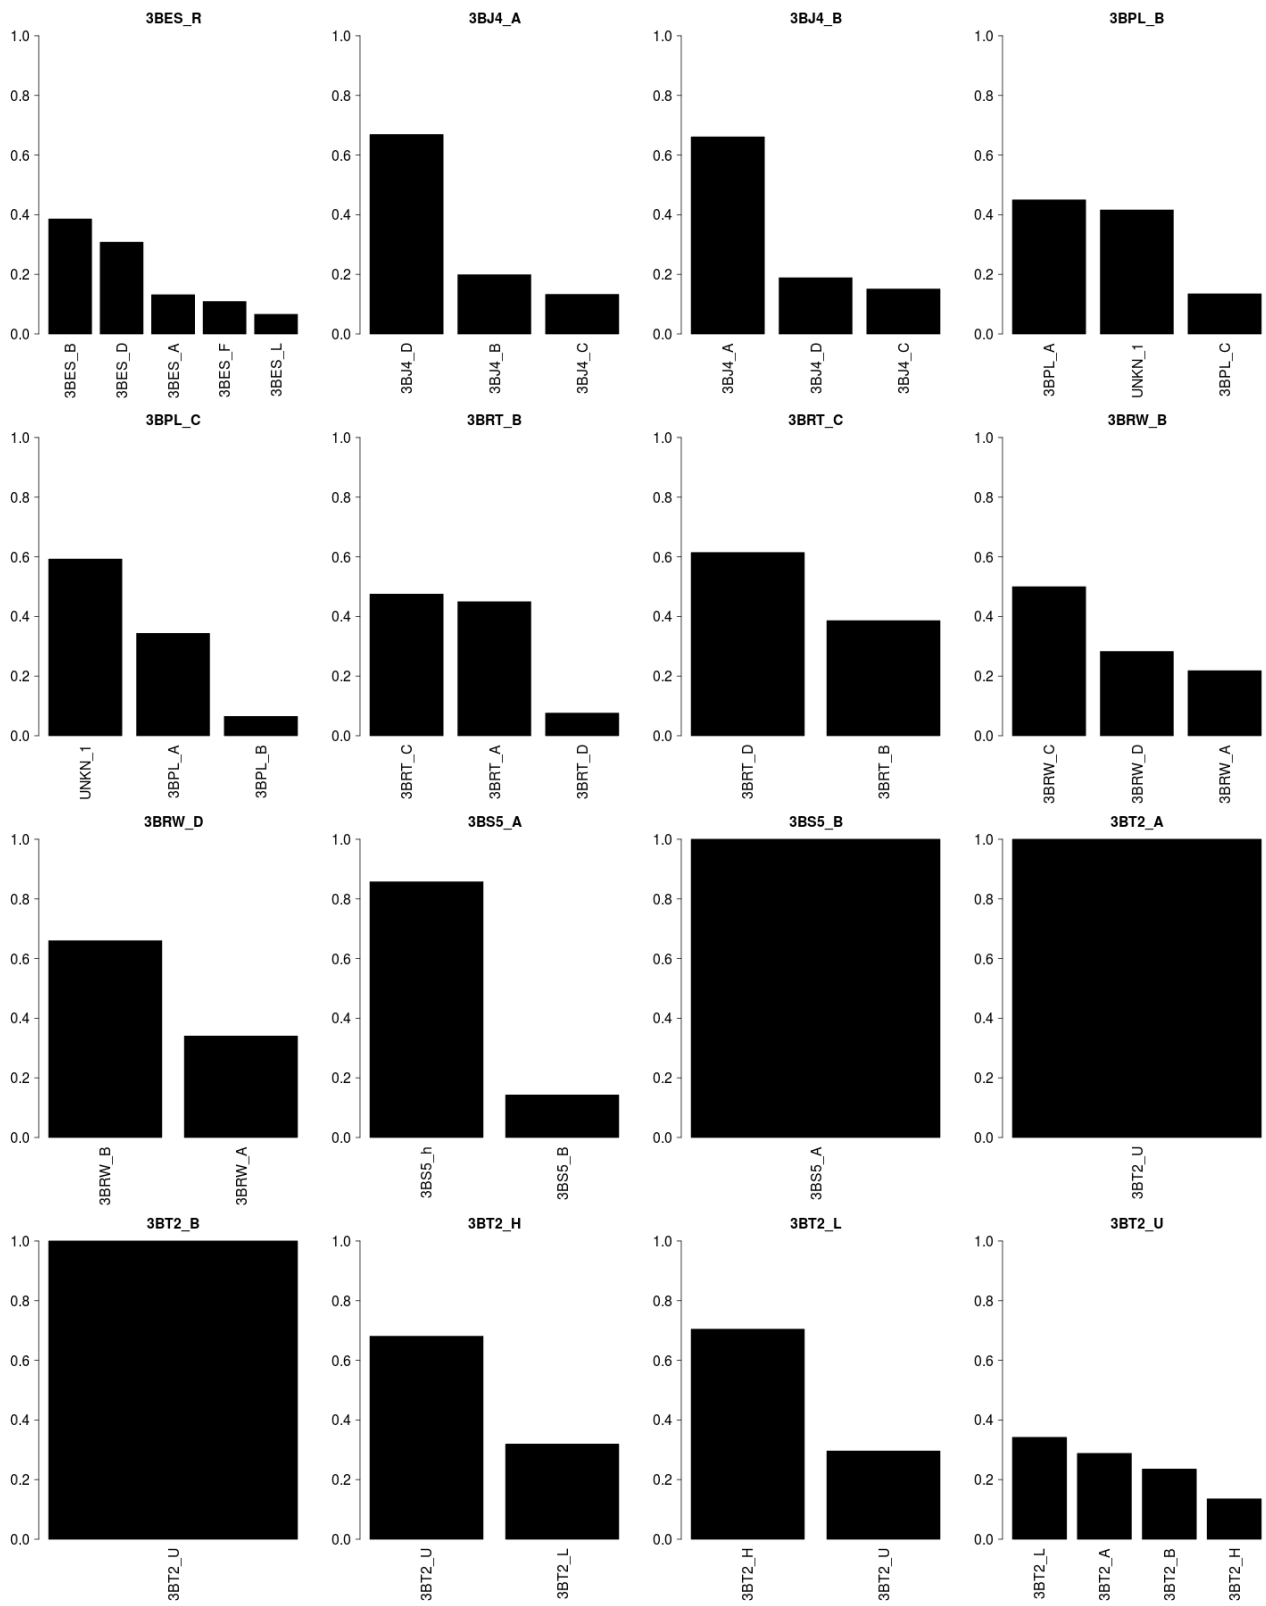

T  
**Figure S13** (continued next page)

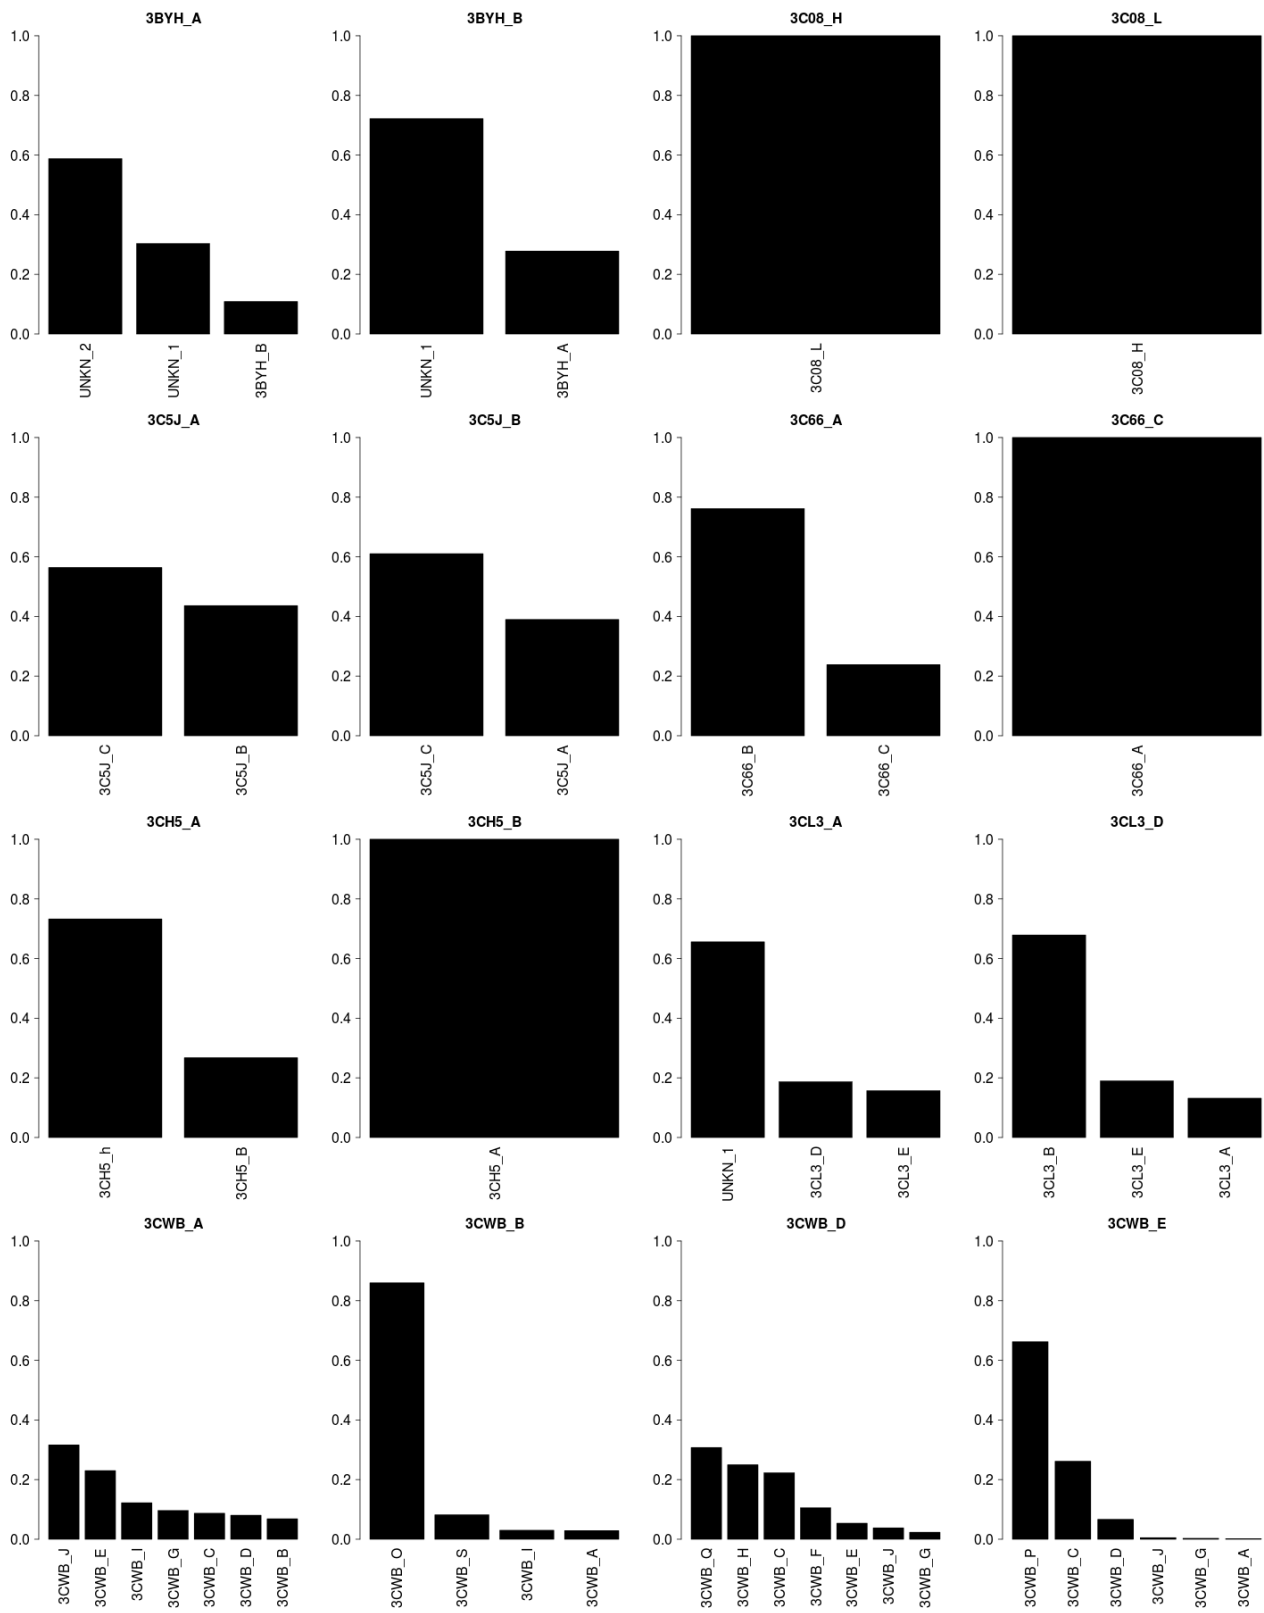

U  
**Figure S13** (continued next page)

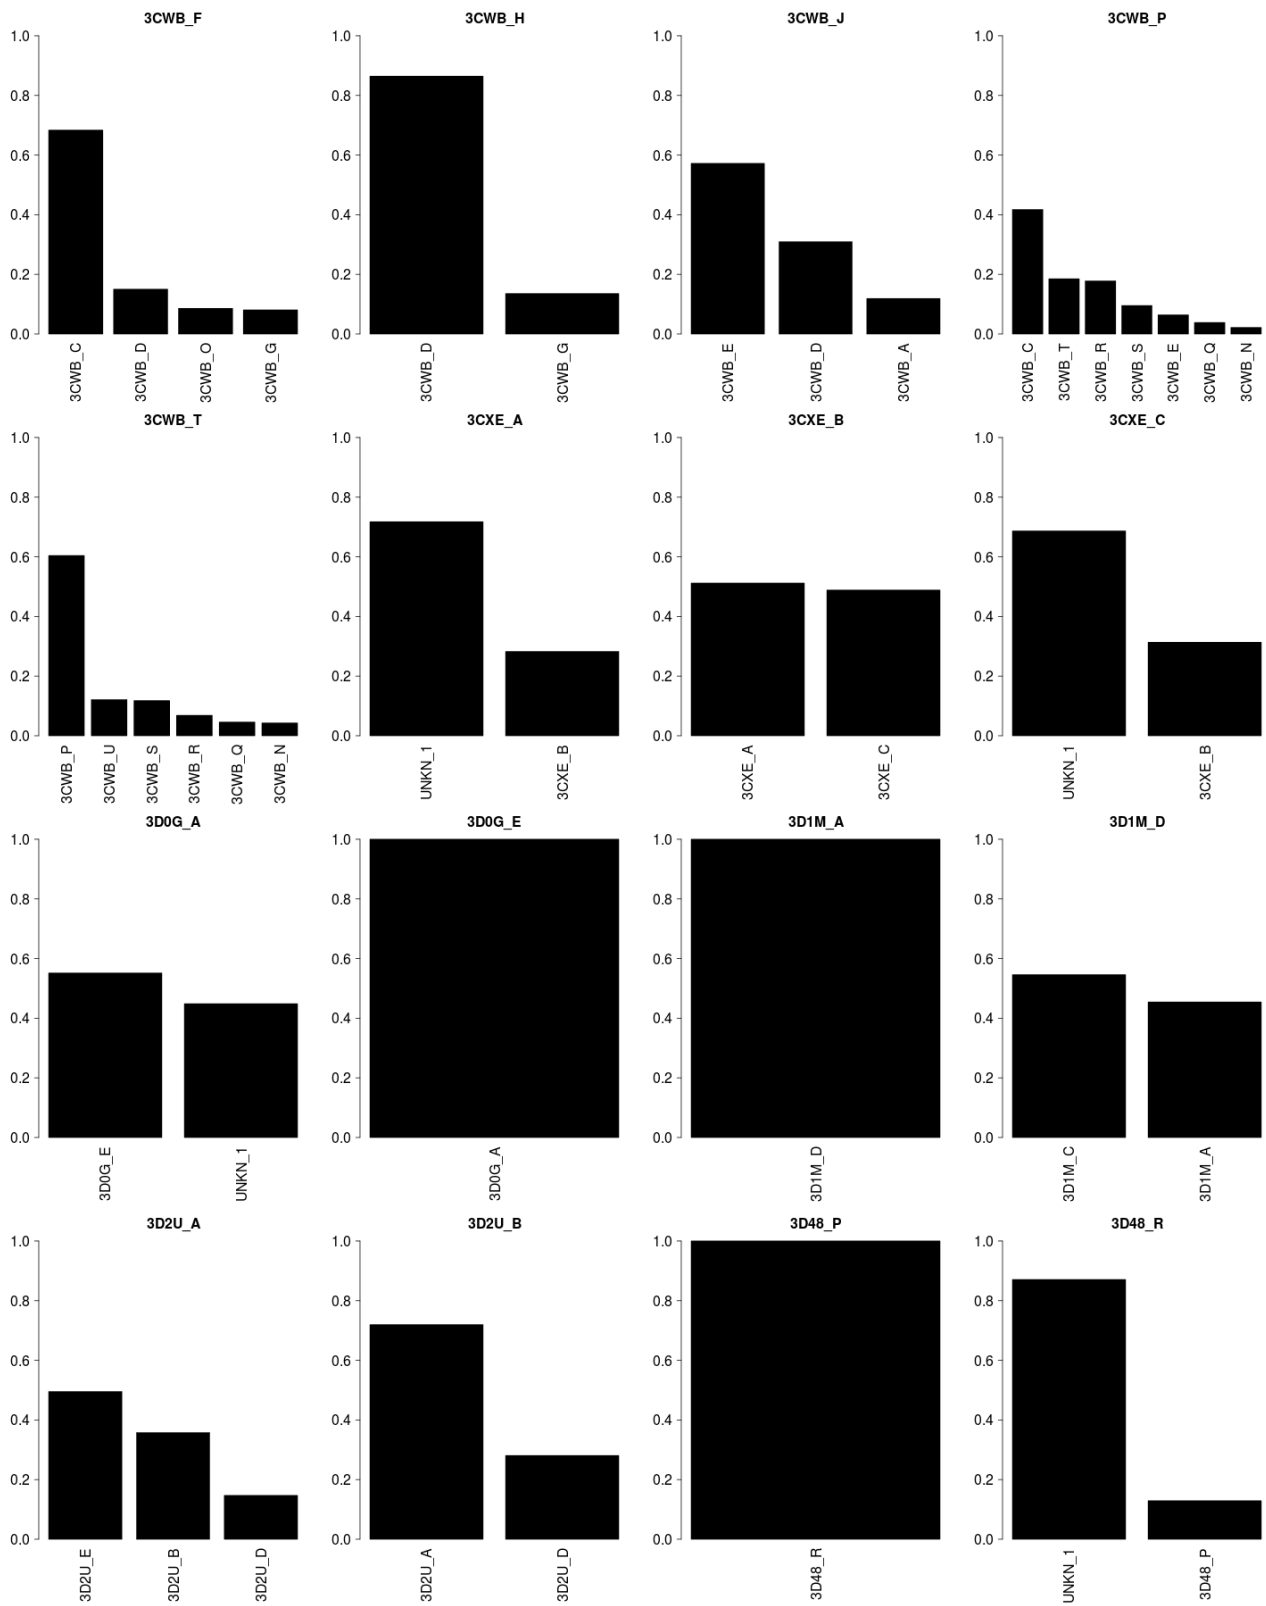

V

Figure S13 (continued next page)

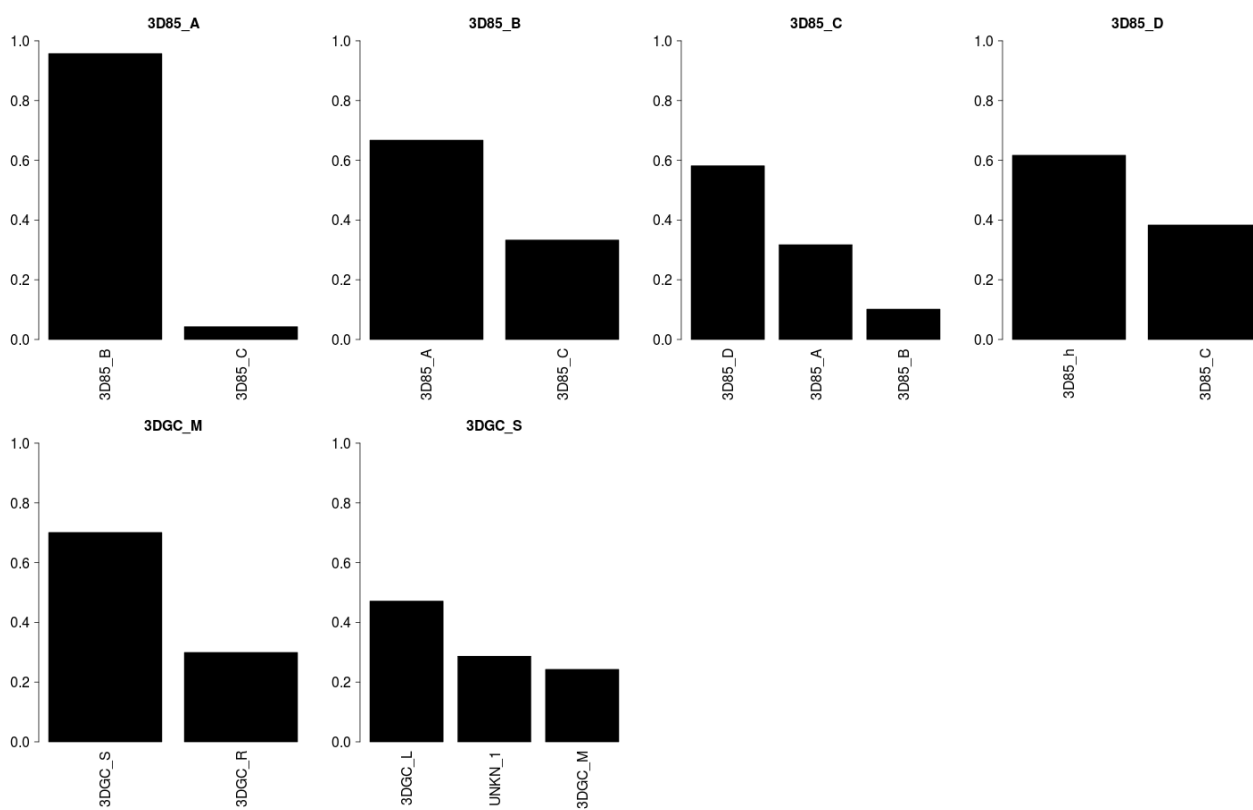

W

**Figure S13(A-W)** : Occupancy rates computed for each interface of each protein as the number of docking poses that presents the best AUC value for this binding site divided by the total number of poses. UNKN indicated predicted alternate interfaces with no identified alternate partners.



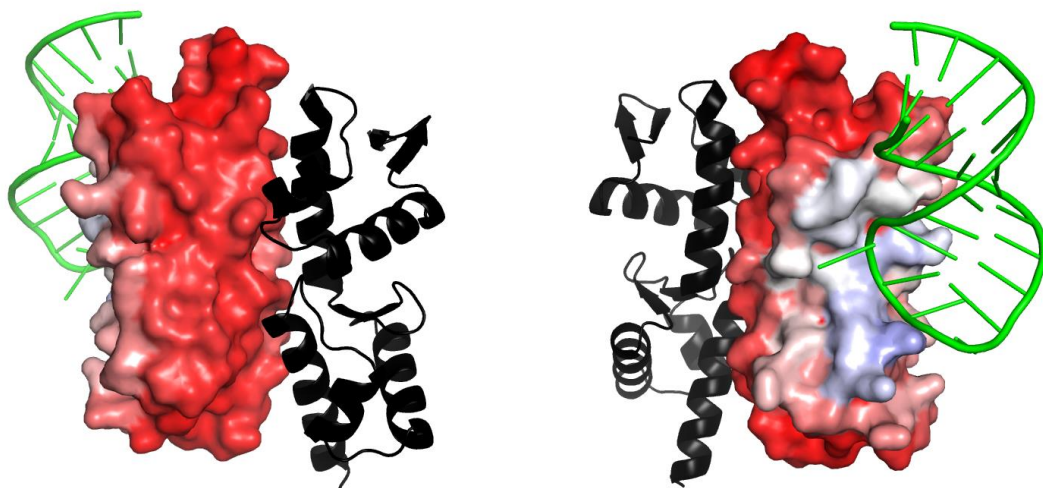

A

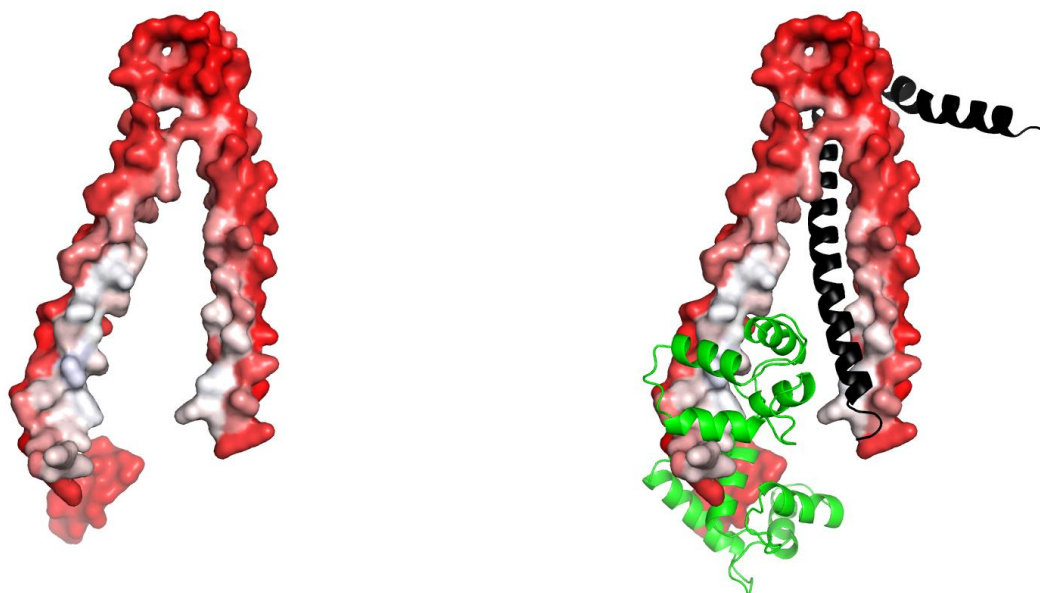

B

**Figure S14 :** Proteins with multiple predicted interface can present (A) one binding site predominantly targeted by the different partners during the cross-docking simulations or (B) similar occupancy rates observed between the different predicted binding sites. The PIP values are mapped on the protein's surface (high PIP residues are shown in blue and low PIP residues are shown in red) and the different partners are showed in cartoon representation in green and black.

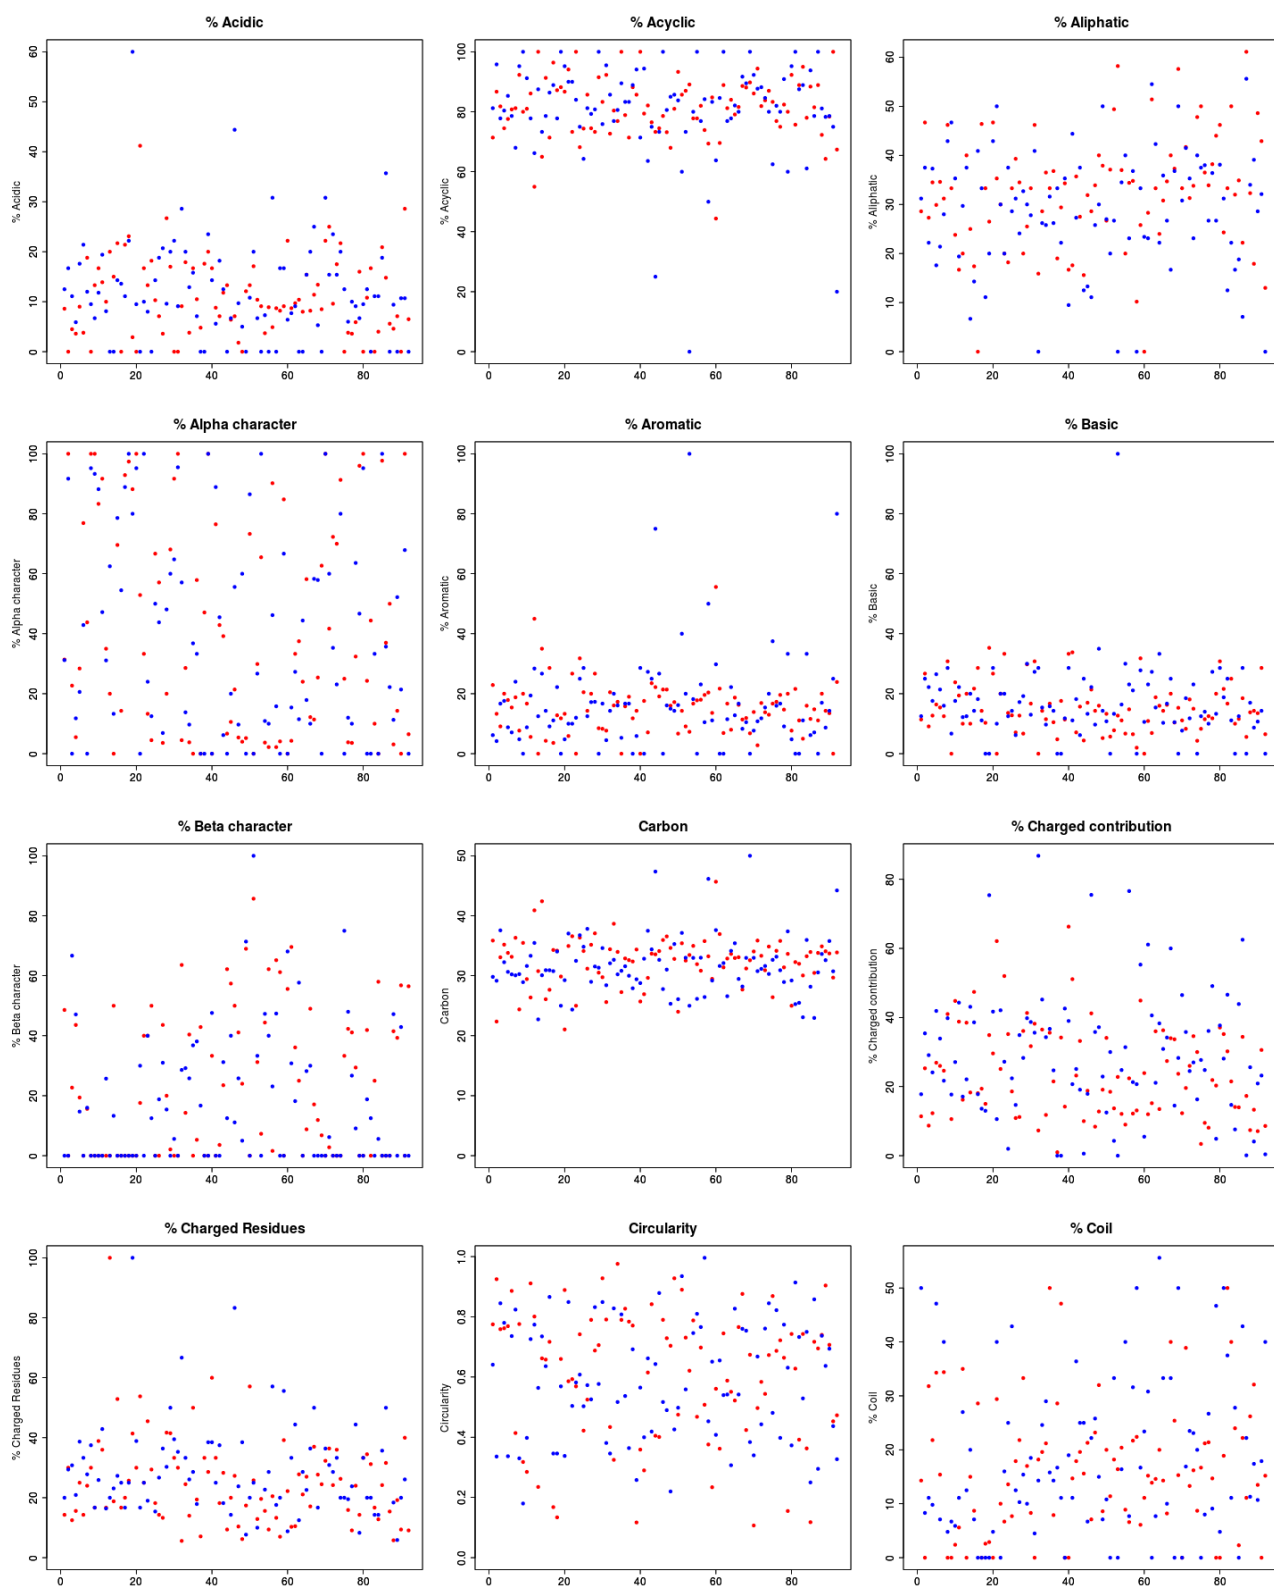

A

**Figure S15** (continued next page)

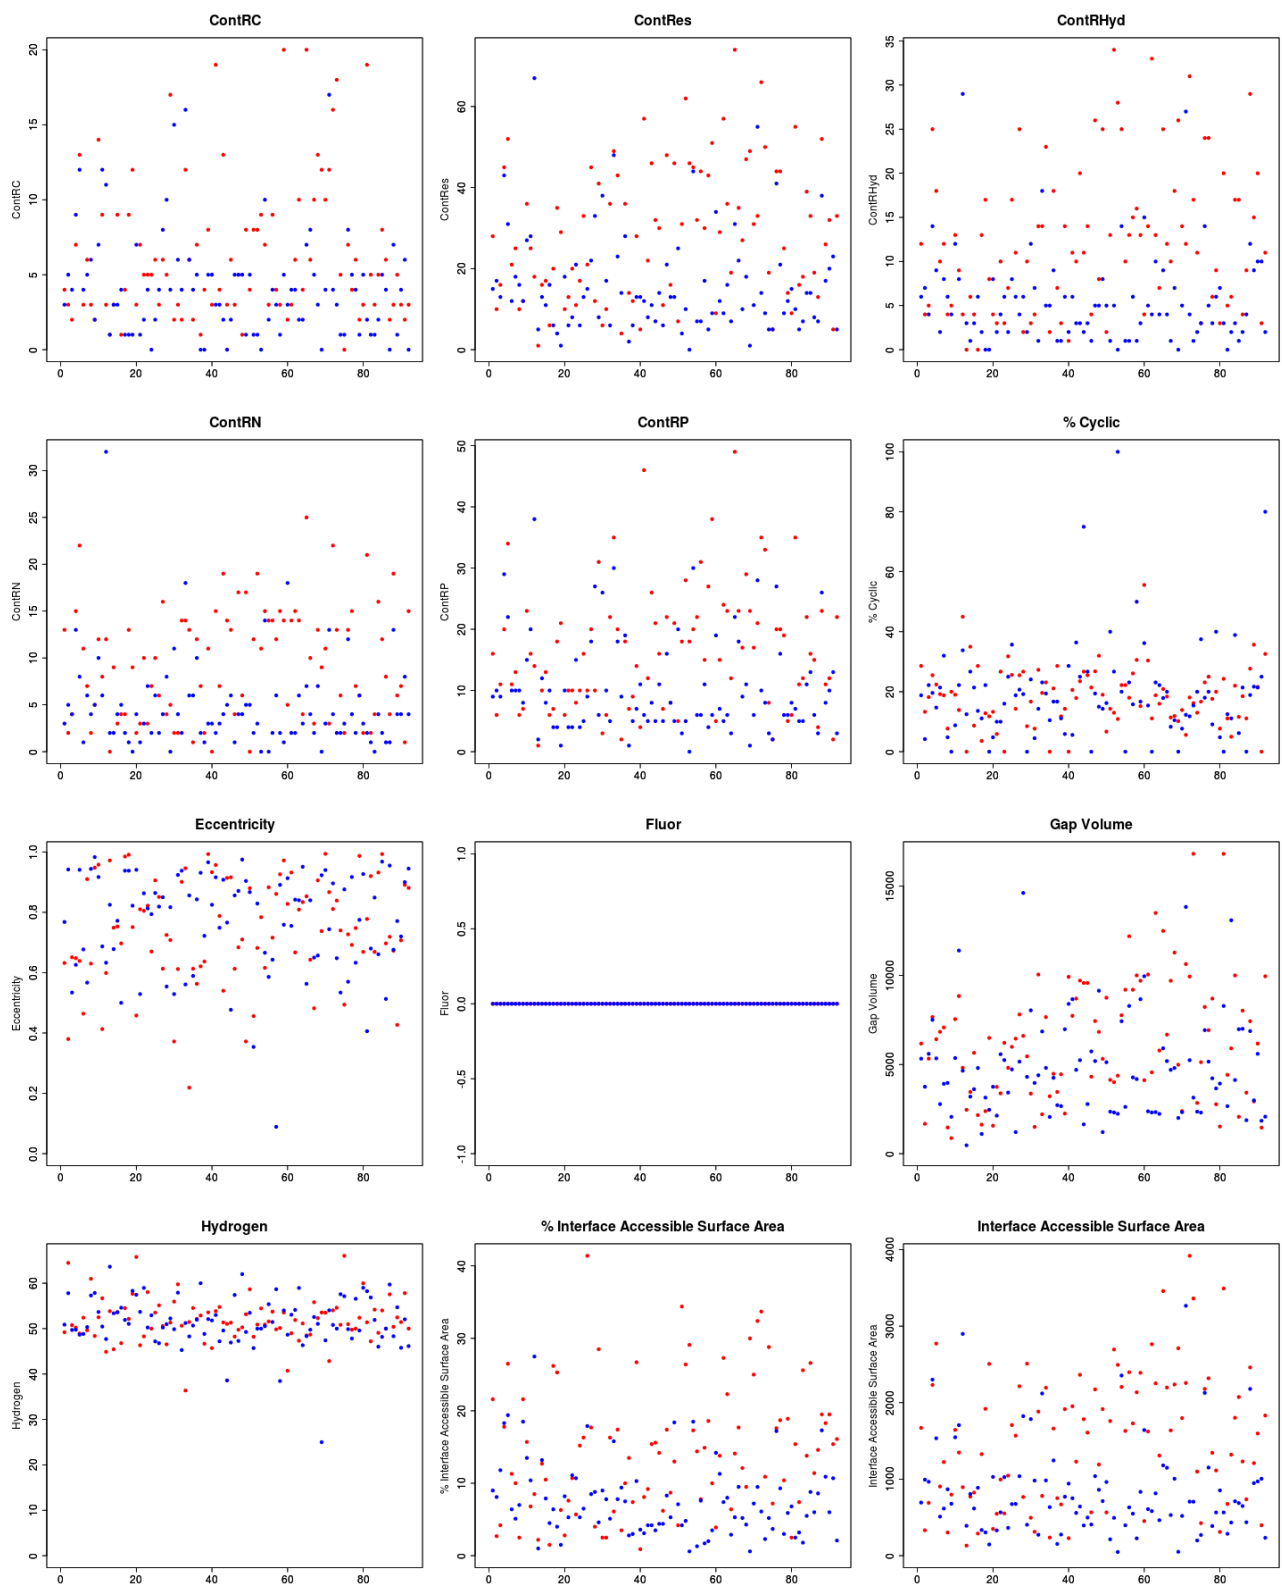

B

Figure S15 (continued next page)

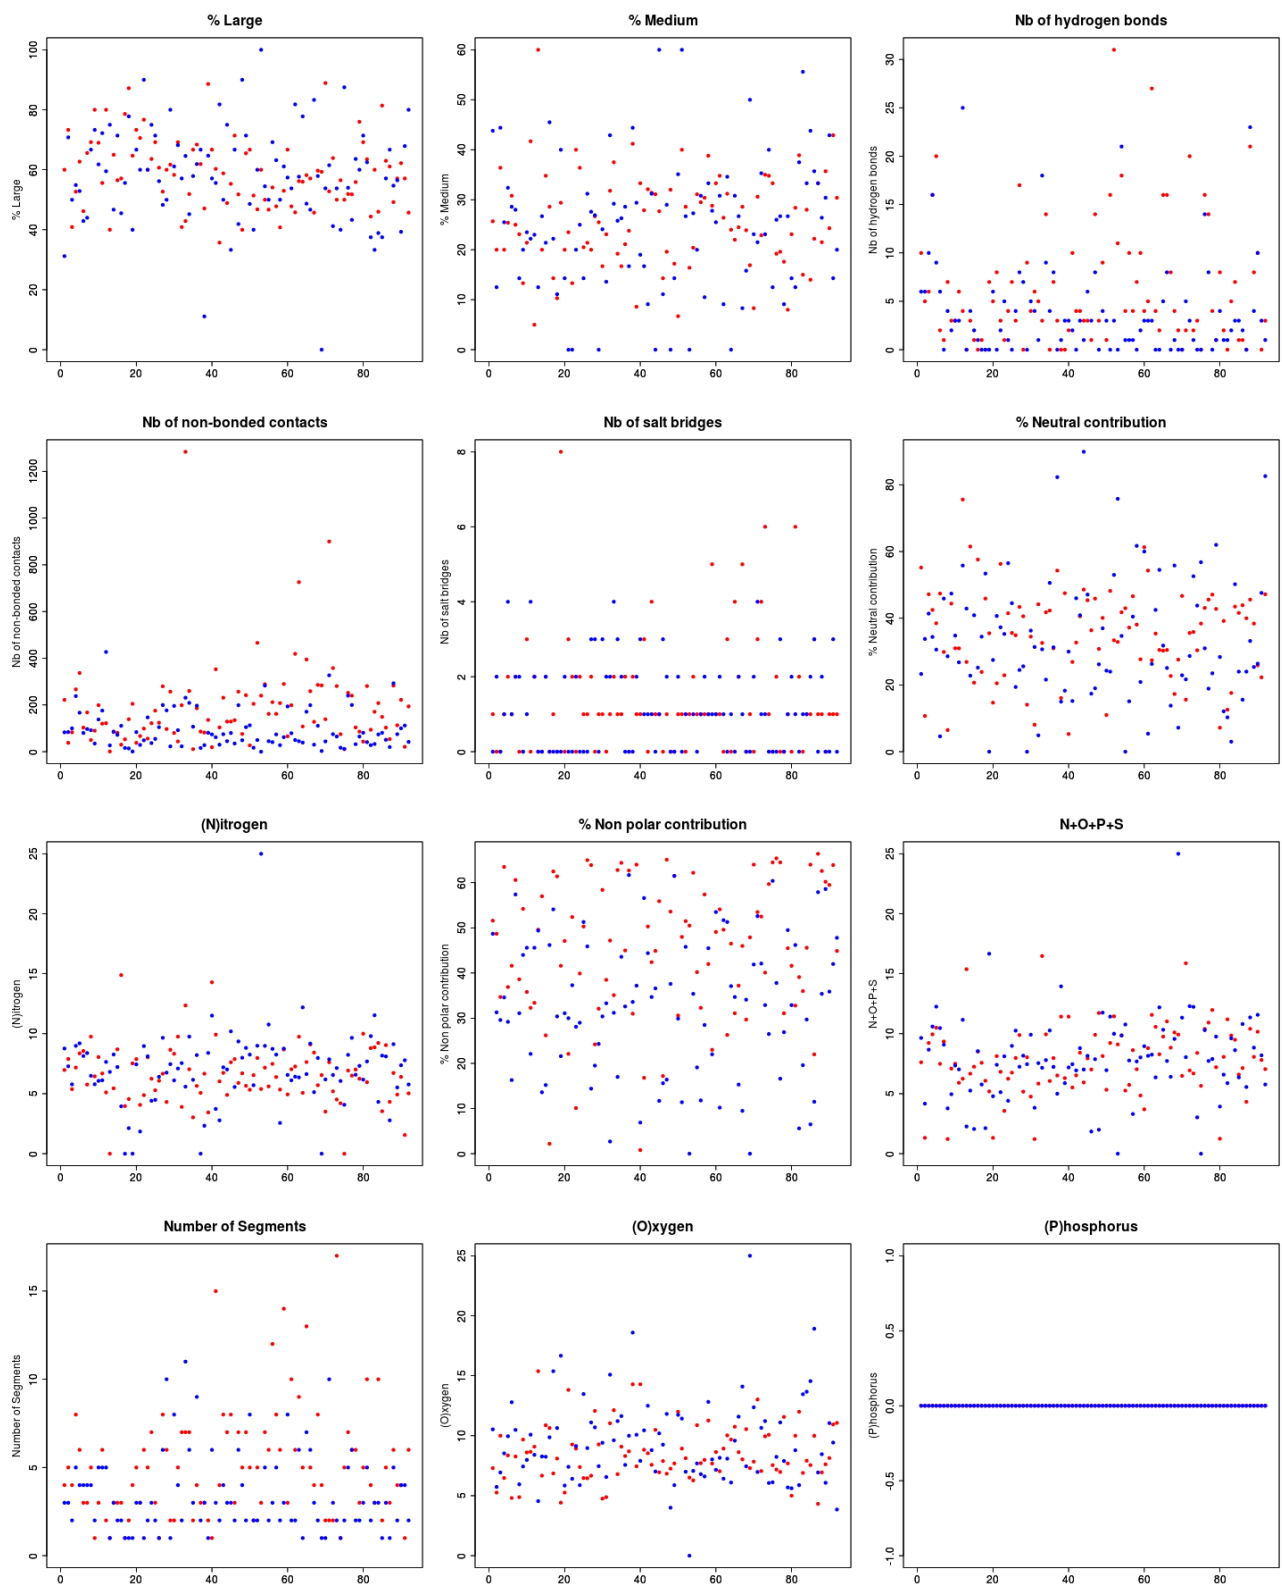

C

Figure S15 (continued next page)

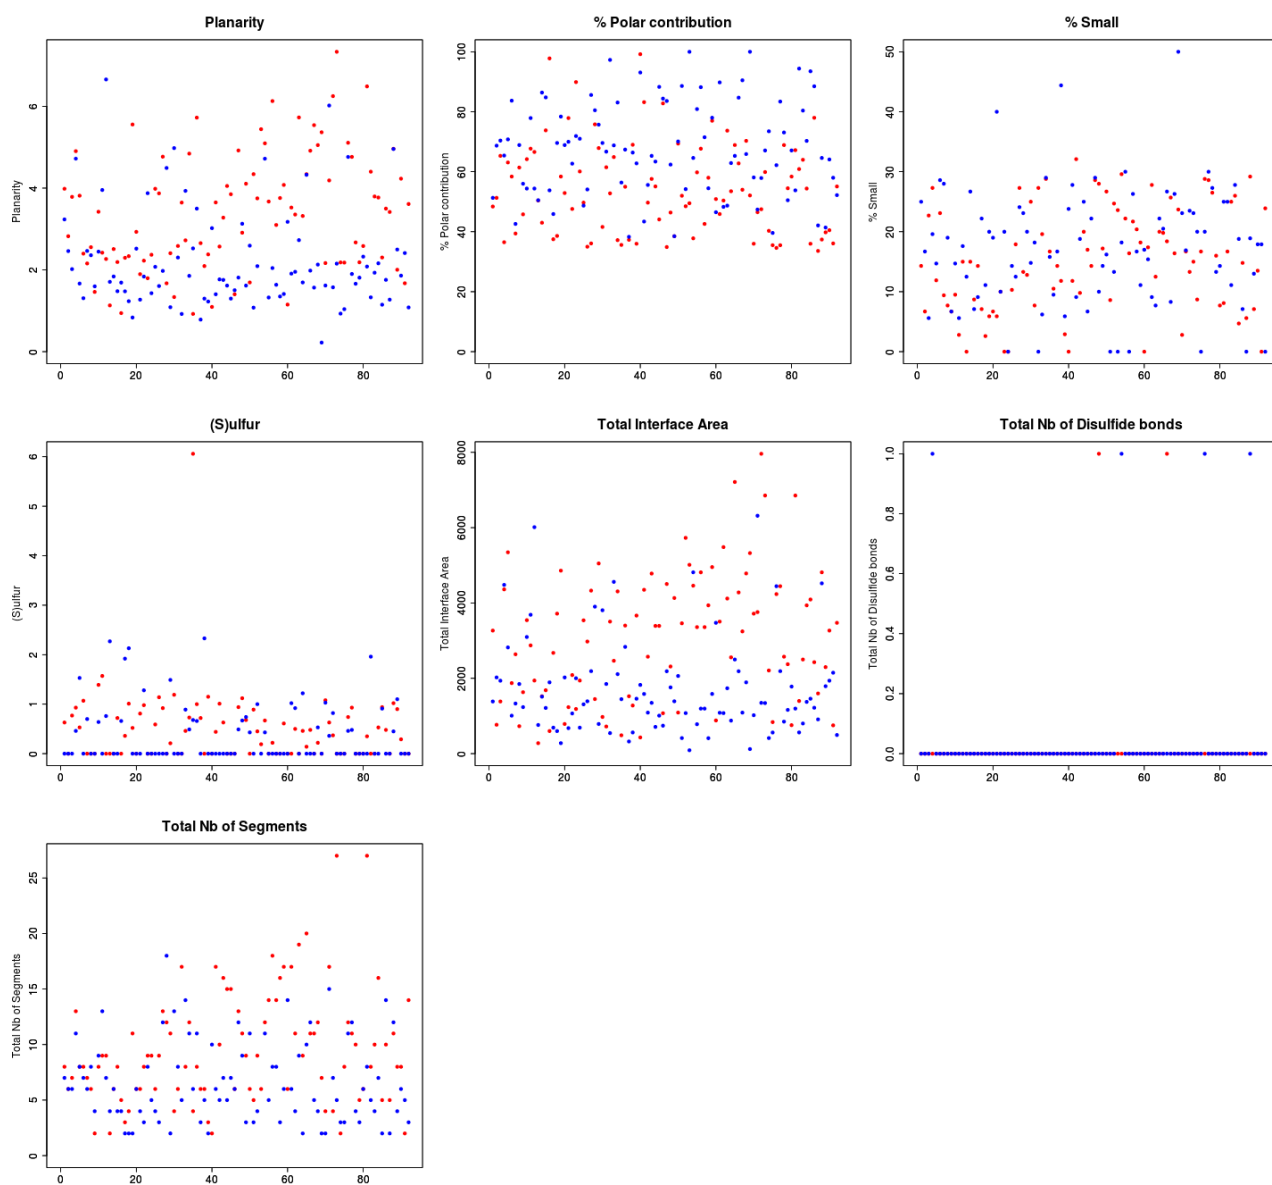

D

**Figure S15 (A-D).** Distribution of the values obtained for each of the 43 P2PI inspector descriptors with the 85 primary interface (PrimI) (showed in red) and the 85 secondary interface (SecI) (showed in blue).

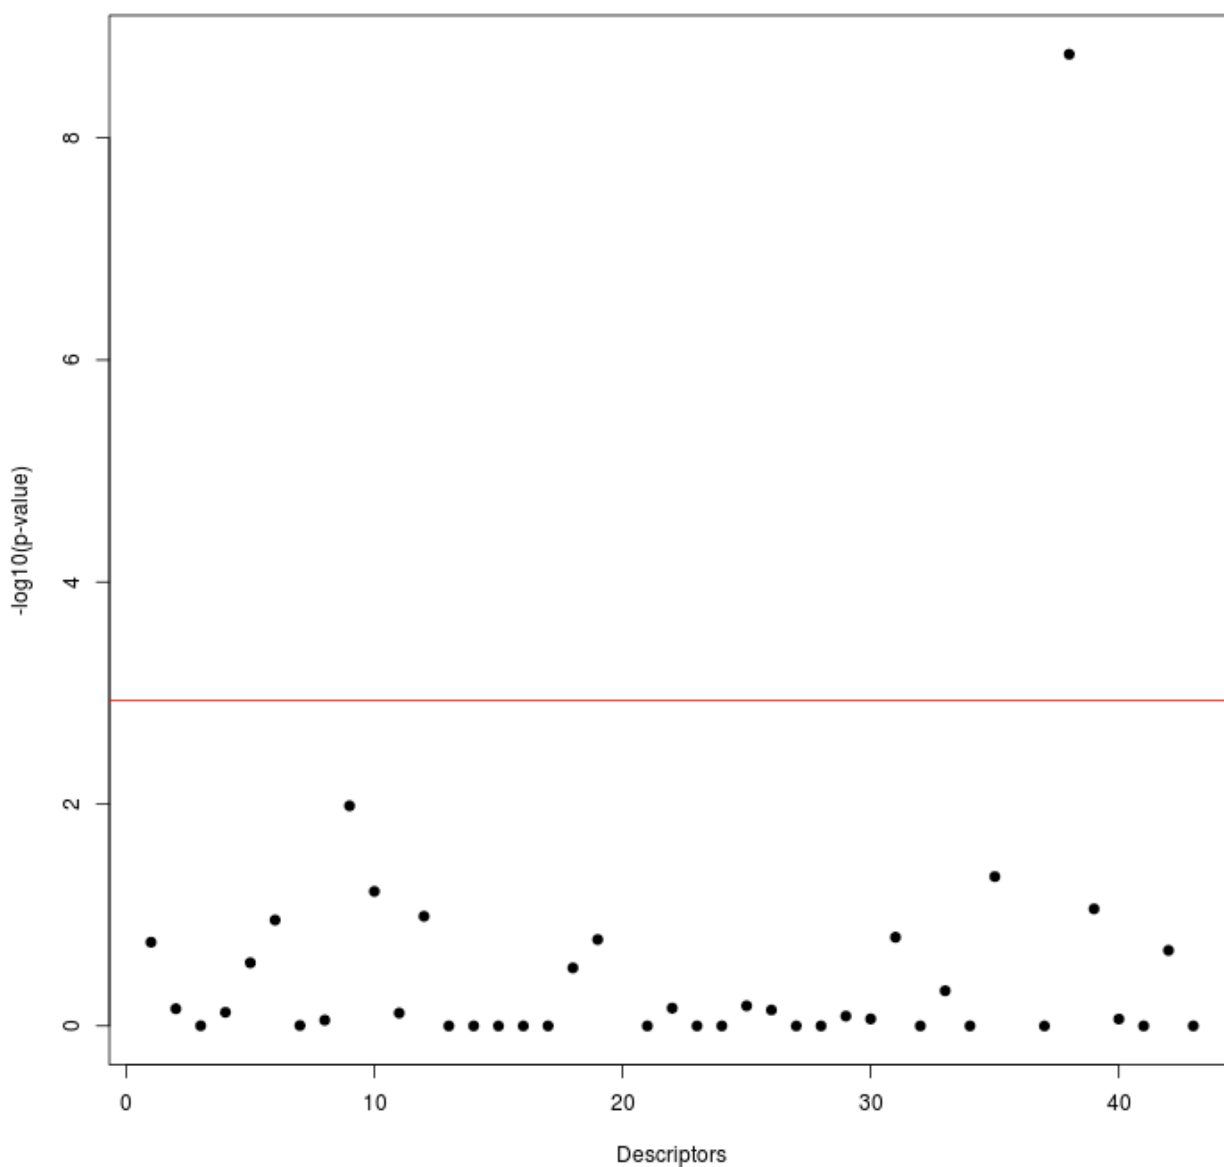

**Figure S16 :** The 43 P2PI inspector descriptors are plotted as the distribution of the negative logarithmic p-value ( $-\log_{10}(\text{p-value})$ ) of the one-tailed Student test option « less ». All descriptors located above the Bonferroni threshold (red line) display a mean value significantly inferior in the PrimI than in the SecI.

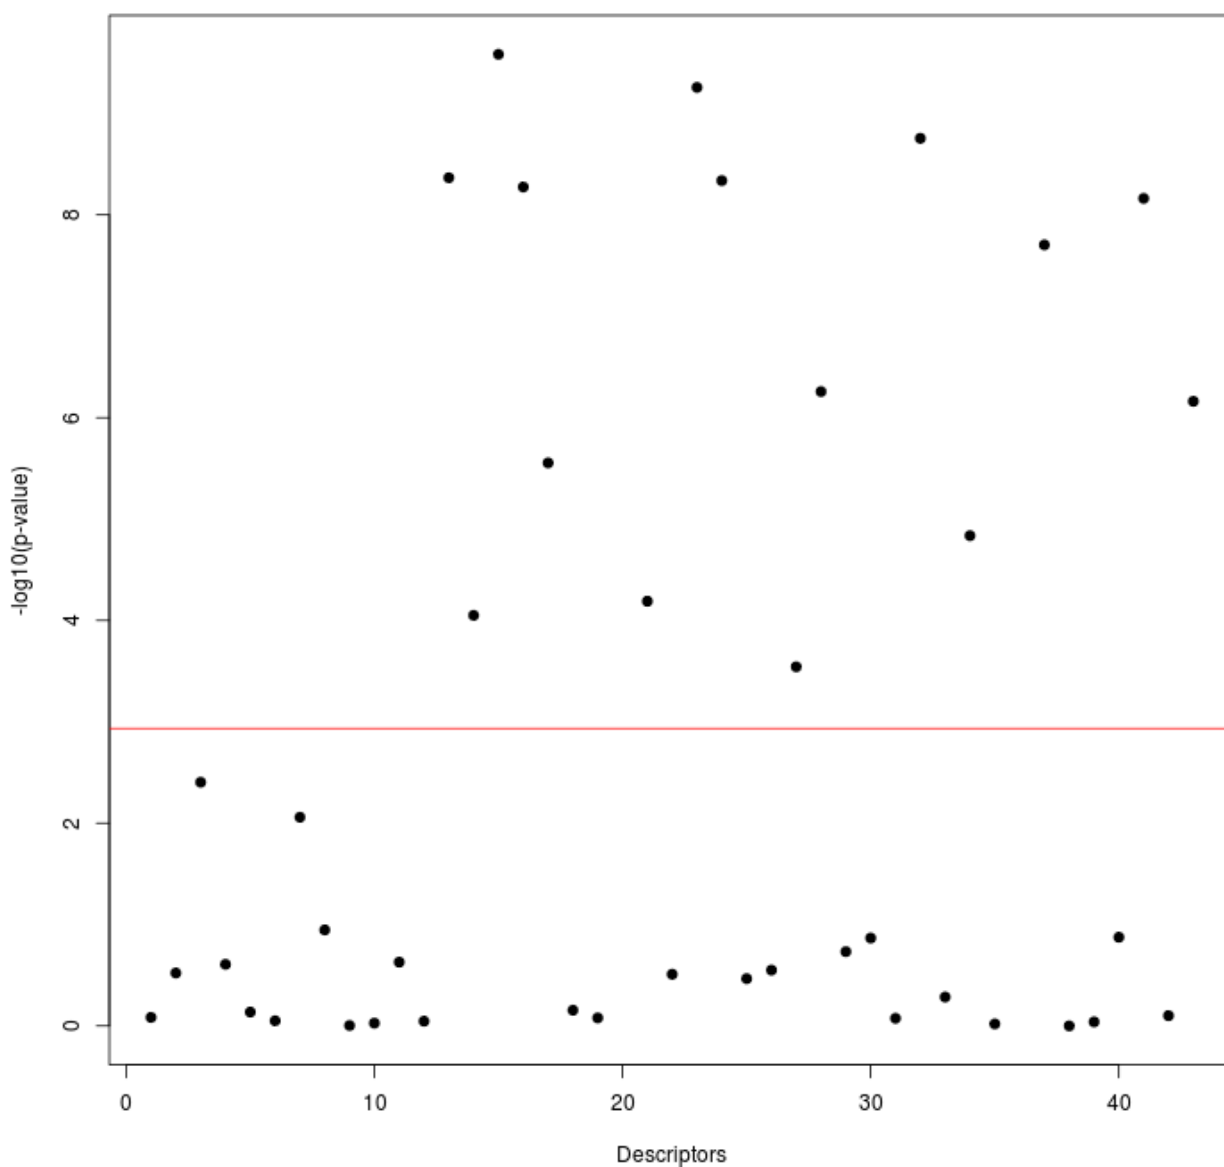

**Figure S17 :** The 43 P2PI inspector descriptors are plotted as the distribution of the negative logarithmic p-value ( $-\log_{10}(\text{p-value})$ ) of the one-tailed Student test option « greater ». All descriptors located above the Bonferroni threshold (red line) display a mean value significantly superior in the PrimI than in the SecI.

| PDB  | Resolution | Chains | Nb residues | Couples                                                                                                  |
|------|------------|--------|-------------|----------------------------------------------------------------------------------------------------------|
| 1AIK | 2.0        | C      | 34          | 1AIK_C--1AIK_N                                                                                           |
|      |            | N      | 36          |                                                                                                          |
| 1AOX | 2.1        | A      | 201         | 1AOX_A--1AOX_B                                                                                           |
|      |            | B      | 201         |                                                                                                          |
| 1APY | 2.0        | A      | 161         | 1APY_A--1APY_B                                                                                           |
|      |            | B      | 141         |                                                                                                          |
| 1ATN | 2.8        | A      | 372         | 1ATN_A--1ATN_D                                                                                           |
|      |            | D      | 258         |                                                                                                          |
| 1AVF | 2.36       | A      | 322         | 1AVF_A--1AVF_P                                                                                           |
|      |            | P      | 21          |                                                                                                          |
| 1AVO | 2.8        | A      | 60          | 1AVO_A--1AVO_B                                                                                           |
|      |            | B      | 140         |                                                                                                          |
| 1CK4 | 2.2        | A      | 193         | 1CK4_A--1CK4_B                                                                                           |
|      |            | B      | 195         |                                                                                                          |
| 1D8D | 2.0        | A      | 323         | 1D8D_A--1D8D_B                                                                                           |
|      |            | B      | 407         |                                                                                                          |
| 1E50 | 2.6        | A      | 115         | 1E50_A--1E50_D                                                                                           |
|      |            | D      | 125         |                                                                                                          |
| 1EF1 | 1.9        | A      | 289         | 1EF1_A--1EF1_C                                                                                           |
|      |            | C      | 87          |                                                                                                          |
| 1EFV | 2.1        | A      | 312         | 1EFV_A--1EFV_B                                                                                           |
|      |            | B      | 252         |                                                                                                          |
| 1EZX | 2.6        | A      | 335         | 1EZX_A--1EZX_B<br>1EZX_A--1EZX_C                                                                         |
|      |            | B      | 36          |                                                                                                          |
|      |            | C      | 140         |                                                                                                          |
| 1F9E | 2.9        | A      | 153         | 1F9E_A--1F9E_B                                                                                           |
|      |            | B      | 89          |                                                                                                          |
| 1FNT | 3.2        | A      | 238         | 1FNT_A--1FNT_B<br>1FNT_A--1FNT_H<br>1FNT_B--1FNT_J<br>1FNT_F--1FNT_N<br>1FNT_H--1FNT_N                   |
|      |            | B      | 247         |                                                                                                          |
|      |            | F      | 233         |                                                                                                          |
|      |            | H      | 196         |                                                                                                          |
|      |            | J      | 204         |                                                                                                          |
|      |            | N      | 233         |                                                                                                          |
| 1GC1 | 2.5        | C      | 181         | 1GC1_C--1GC1_G                                                                                           |
|      |            | G      | 297         |                                                                                                          |
| 1GK4 | 2.3        | A      | 79          | 1GK4_A--1GK4_C<br>1GK4_A--1GK4_D<br>1GK4_A--1GK4_F<br>1GK4_C--1GK4_D<br>1GK4_C--1GK4_F<br>1GK4_D--1GK4_F |
|      |            | C      | 70          |                                                                                                          |
|      |            | D      | 78          |                                                                                                          |
|      |            | F      | 74          |                                                                                                          |
|      |            |        |             |                                                                                                          |
| 1GL4 | 2.0        | A      | 273         | 1GL4_A--1GL4_B                                                                                           |
|      |            | B      | 89          |                                                                                                          |
| 1GT0 | 2.6        | C      | 138         | 1GT0_C--1GT0_D                                                                                           |
|      |            | D      | 80          |                                                                                                          |

**Table S1.** (continued next page)



| PDB  | Resolution | Chains | Nb residues | Couples        |
|------|------------|--------|-------------|----------------|
| 1H2K | 2.15       | A      | 332         | 1H2K_A--1H2K_S |
|      |            | S      | 24          |                |
| 1H6V | 3.0        | A      | 490         | 1H6V_A--1H6V_B |
|      |            | B      | 487         | 1H6V_A--1H6V_C |
|      |            | C      | 482         | 1H6V_C--1H6V_E |
|      |            | E      | 491         |                |
| 1H8B | NMR        | A      | 73          | 1H8B_A--1H8B_B |
|      |            | B      | 23          |                |
| 1I7X | 3.0        | A      | 522         | 1I7X_A--1I7X_B |
|      |            | B      | 57          | 1I7X_A--1I7X_C |
|      |            | C      | 521         |                |
| 1IBC | 2.73       | A      | 167         | 1IBC_A--1IBC_B |
|      |            | B      | 88          |                |
| 1IW0 | 1.4        | A      | 207         | 1IW0_A--1IW0_B |
|      |            | B      | 209         | 1IW0_B--1IW0_C |
|      |            | C      | 207         |                |
| 1J1D | 2.61       | E      | 75          | 1J1D_E--1J1D_F |
|      |            | F      | 116         |                |
| 1JJO | 3.06       | A      | 40          | 1JJO_A--1JJO_C |
|      |            | C      | 244         | 1JJO_A--1JJO_E |
|      |            | E      | 33          | 1JJO_C--1JJO_E |
| 1JWY | 2.3        | A      | 753         | 1JWY_A--1JWY_B |
|      |            | B      | 316         |                |
| 1KFU | 2.5        | L      | 699         | 1KFU_L--1KFU_S |
|      |            | S      | 184         |                |
| 1KU6 | 2.5        | A      | 535         | 1KU6_A--1KU6_B |
|      |            | B      | 61          |                |
| 1LDK | 3.1        | A      | 358         | 1LDK_A--1LDK_B |
|      |            | B      | 366         |                |
| 1LI1 | 1.9        | A      | 228         | 1LI1_A--1LI1_B |
|      |            | B      | 227         | 1LI1_A--1LI1_C |
|      |            | C      | 224         | 1LI1_B--1LI1_C |
|      |            |        |             | 1LI1_B--1LI1_F |
|      |            | F      | 225         | 1LI1_C--1LI1_F |
| 1LM5 | 1.8        | A      | 189         | 1LM5_A--1LM5_B |
|      |            | B      | 193         |                |
| 1LYA | 2.5        | A      | 97          | 1LYA_A--1LYA_B |
|      |            | B      | 241         |                |

**Table S1.** (continued next page)

| PDB  | Resolution | Chains | Nb residues | Couples                          |
|------|------------|--------|-------------|----------------------------------|
| 1M3D | 2.0        | A      | 223         | 1M3D_A--1M3D_B<br>1M3D_A--1M3D_C |
|      |            | B      | 224         | 1M3D_A--1M3D_D<br>1M3D_A--1M3D_E |
|      |            | C      | 222         | 1M3D_B--1M3D_C<br>1M3D_B--1M3D_D |
|      |            | D      | 225         | 1M3D_B--1M3D_E<br>1M3D_B--1M3D_F |
|      |            | E      | 224         | 1M3D_C--1M3D_E<br>1M3D_C--1M3D_F |
|      |            | F      | 223         | 1M3D_D--1M3D_E<br>1M3D_D--1M3D_F |
|      |            | G      | 225         | 1M3D_D--1M3D_H<br>1M3D_E--1M3D_F |
|      |            | H      | 224         | 1M3D_G--1M3D_H<br>1M3D_H--1M3D_L |
| 1M63 | 2.8        | C      | 165         | 1M63_C--1M63_E                   |
|      |            | E      | 359         |                                  |
| 1MDM | 2.8        | A      | 124         | 1MDM_A--1MDM_B                   |
|      |            | B      | 129         |                                  |
| 1MHW | 1.9        | A      | 173         | 1MHW_A--1MHW_C                   |
|      |            | C      | 41          |                                  |
| 1NCI | 2.1        | A      | 102         | 1NCI_A--1NCI_B                   |
|      |            | B      | 96          |                                  |
| 1NH2 | 1.9        | B      | 46          | 1NH2_B--1NH2_C                   |
|      |            | C      | 50          |                                  |
| 1NME | 1.6        | A      | 146         | 1NME_A--1NME_B                   |
|      |            | B      | 92          |                                  |
| 1NT2 | 2.9        | A      | 209         | 1NT2_A--1NT2_B                   |
|      |            | B      | 236         |                                  |
| 1PON | NMR        | A      | 34          | 1PON_A--1PON_B                   |
|      |            | B      | 34          |                                  |
| 1PYO | 1.65       | A      | 159         | 1PYO_A--1PYO_B                   |
|      |            | B      | 98          |                                  |
| 1Q68 | NMR        | A      | 38          | 1Q68_A--1Q68_B                   |
|      |            | B      | 29          |                                  |
| 1R4M | 3.0        | B      | 418         | 1R4M_B--1R4M_I                   |
|      |            | I      | 76          |                                  |
| 1RF3 | 3.5        | A      | 192         | 1RF3_A--1RF3_B                   |
|      |            | B      | 24          |                                  |
| 1RKC | 2.7        | A      | 258         | 1RKC_A--1RKC_B                   |
|      |            | B      | 26          |                                  |
| 1RVF | 4.0        | 2      | 255         | 1RVF_2--1RVF_3                   |
|      |            | 3      | 236         | 1RVF_2--1RVF_4                   |
|      |            | 4      | 40          | 1RVF_3--1RVF_4                   |
| 1SHW | 2.2        | A      | 138         | 1SHW_A--1SHW_B                   |
|      |            | B      | 181         |                                  |

**Table S1.** (continued next page)

| PDB  | Resolution | Chains | Nb residues | Couples                                                              |
|------|------------|--------|-------------|----------------------------------------------------------------------|
| 1US7 | 2.3        | A      | 207         | 1US7_A--1US7_B                                                       |
|      |            | B      | 194         |                                                                      |
| 1VYH | 3.4        | A      | 218         | 1VYH_A--1VYH_C                                                       |
|      |            | B      | 310         |                                                                      |
| 1WSU | 2.3        | A      | 124         | 1WSU_A--1WSU_B<br>1WSU_C--1WSU_D                                     |
|      |            | B      | 122         |                                                                      |
|      |            | C      | 102         |                                                                      |
|      |            | D      | 121         |                                                                      |
| 1Y8N | 2.6        | A      | 374         | 1Y8N_A--1Y8N_B                                                       |
|      |            | B      | 97          |                                                                      |
| 1YA5 | 2.44       | A      | 198         | 1YA5_A--1YA5_T                                                       |
|      |            | T      | 89          |                                                                      |
| 1YDI | 1.8        | A      | 256         | 1YDI_A--1YDI_B                                                       |
|      |            | B      | 24          |                                                                      |
| 1YK1 | 2.9        | A      | 394         | 1YK1_A--1YK1_E                                                       |
|      |            | E      | 21          |                                                                      |
| 1YY9 | 2.6        | C      | 211         | 1YY9_C--1YY9_D                                                       |
|      |            | D      | 220         |                                                                      |
| 1ZSG | NMR        | A      | 65          | 1ZSG_A--1ZSG_B                                                       |
|      |            | B      | 22          |                                                                      |
| 1ZTP | 2.5        | A      | 225         | 1ZTP_A--1ZTP_C                                                       |
|      |            | C      | 218         |                                                                      |
| 2AGH | NMR        | A      | 25          | 2AGH_A--2AGH_B<br>2AGH_B--2AGH_C                                     |
|      |            | B      | 87          |                                                                      |
|      |            | C      | 31          |                                                                      |
| 2AWW | 2.21       | A      | 91          | 2AWW_A--2AWW_B                                                       |
|      |            | B      | 91          |                                                                      |
| 2BDN | 2.53       | H      | 217         | 2BDN_H--2BDN_L                                                       |
|      |            | L      | 214         |                                                                      |
| 2BKI | 2.9        | B      | 145         | 2BKI_B--2BKI_D                                                       |
|      |            | D      | 78          |                                                                      |
| 2BOV | 2.66       | A      | 174         | 2BOV_A--2BOV_B                                                       |
|      |            | B      | 208         |                                                                      |
| 2C0L | 2.3        | A      | 292         | 2C0L_A--2C0L_B                                                       |
|      |            | B      | 122         |                                                                      |
| 2C35 | 2.7        | A      | 129         | 2C35_A--2C35_B                                                       |
|      |            | B      | 171         |                                                                      |
| 2C63 | 2.15       | A      | 233         | 2C63_A--2C63_B<br>2C63_A--2C63_C<br>2C63_B--2C63_D<br>2C63_C--2C63_D |
|      |            | B      | 233         |                                                                      |
|      |            | C      | 233         |                                                                      |
|      |            | D      | 233         |                                                                      |
| 2C74 | 2.7        | A      | 235         | 2C74_A--2C74_B                                                       |
|      |            | B      | 234         |                                                                      |
| 2C9W | 1.9        | A      | 153         | 2C9W_A--2C9W_C                                                       |
|      |            | C      | 80          |                                                                      |

**Table S1** (continued next page)

| PDB  | Resolution | Chains | Nb residues | Couples                                                                                                  |
|------|------------|--------|-------------|----------------------------------------------------------------------------------------------------------|
| 2D1X | 1.9        | A      | 60          | 2D1X_A--2D1X_B<br>2D1X_A--2D1X_C                                                                         |
|      |            | B      | 59          |                                                                                                          |
|      |            | C      | 66          |                                                                                                          |
| 2DJG | 2.05       | A      | 114         | 2DJG_A--2DJG_B<br>2DJG_A--2DJG_C<br>2DJG_B--2DJG_C                                                       |
|      |            | B      | 161         |                                                                                                          |
|      |            | C      | 68          |                                                                                                          |
| 2DRN | NMR        | A      | 46          | 2DRN_A--2DRN_C                                                                                           |
|      |            | C      | 24          |                                                                                                          |
| 2DVW | 2.3        | A      | 229         | 2DVW_A--2DVW_B                                                                                           |
|      |            | B      | 73          |                                                                                                          |
| 2E9W | 3.5        | A      | 468         | 2E9W_A--2E9W_C                                                                                           |
|      |            | C      | 132         |                                                                                                          |
| 2E9X | 2.3        | A      | 144         | 2E9X_A--2E9X_B<br>2E9X_A--2E9X_C<br>2E9X_A--2E9X_D<br>2E9X_B--2E9X_C<br>2E9X_B--2E9X_D<br>2E9X_C--2E9X_D |
|      |            | B      | 175         |                                                                                                          |
|      |            | C      | 186         |                                                                                                          |
|      |            | D      | 197         |                                                                                                          |
| 2FFK | NMR        | A      | 242         | 2FFK_A--2FFK_B                                                                                           |
|      |            | B      | 69          |                                                                                                          |
| 2GD4 | 3.3        | H      | 234         | 2GD4_H--2GD4_L                                                                                           |
|      |            | L      | 54          |                                                                                                          |
| 2GEZ | 2.6        | B      | 133         | 2GEZ_B--2GEZ_C                                                                                           |
|      |            | C      | 166         |                                                                                                          |
| 2GIX | 2.02       | A      | 206         | 2GIX_A--2GIX_B<br>2GIX_A--2GIX_D<br>2GIX_B--2GIX_D                                                       |
|      |            | B      | 201         |                                                                                                          |
|      |            | D      | 205         |                                                                                                          |
| 2H0D | 2.5        | A      | 97          | 2H0D_A--2H0D_B                                                                                           |
|      |            | B      | 100         |                                                                                                          |
| 2I1N | 1.85       | A      | 101         | 2I1N_A--2I1N_B                                                                                           |
|      |            | B      | 102         |                                                                                                          |
| 2I32 | 2.7        | A      | 154         | 2I32_A--2I32_E                                                                                           |
|      |            | E      | 21          |                                                                                                          |
| 2IAE | 3.5        | A      | 583         | 2IAE_A--2IAE_B                                                                                           |
|      |            | B      | 376         |                                                                                                          |
| 2JJS | 1.85       | A      | 116         | 2JJS_A--2JJS_C                                                                                           |
|      |            | C      | 115         |                                                                                                          |
| 2JZ3 | NMR        | B      | 118         | 2JZ3_B--2JZ3_C                                                                                           |
|      |            | C      | 96          |                                                                                                          |
| 2K2U | NMR        | A      | 115         | 2K2U_A--2K2U_B                                                                                           |
|      |            | B      | 35          |                                                                                                          |
| 2NL9 | 1.55       | A      | 140         | 2NL9_A--2NL9_B                                                                                           |
|      |            | B      | 23          |                                                                                                          |

**Table S1** (continued next page)

| PDB  | Resolution | Chains         | Nb residues | Couples        |
|------|------------|----------------|-------------|----------------|
| 2NNA | 2.1        | A              | 182         | 2NNA_A--2NNA_B |
|      |            | B              | 182         |                |
| 2NNW | 2.7        | A              | 350         | 2NNW_A--2NNW_B |
|      |            | B              | 227         |                |
| 2NQB | 2.3        | D              | 95          | 2NQB_D--2NQB_G |
|      |            | G              | 105         |                |
| 2NVU | 2.8        | B              | 789         | 2NVU_B--2NVU_C |
|      |            | C              | 176         |                |
| 2O8A | 2.61       | A              | 295         | 2O8A_A--2O8A_I |
|      |            | I              | 59          |                |
| 2ODB | 2.4        | A              | 177         | 2ODB_A--2ODB_B |
|      |            | B              | 35          |                |
| 2OT3 | 2.1        | A              | 253         | 2OT3_A--2OT3_B |
|      |            | B              | 157         |                |
| 2P1L | 2.5        | A              | 141         | 2P1L_A--2P1L_B |
|      |            | B              | 24          |                |
| 2P1M | 1.8        | A              | 90          | 2P1M_A--2P1M_B |
|      |            | B              | 567         |                |
| 2PAV | 1.8        | A              | 361         | 2PAV_A--2PAV_P |
|      |            | P              | 139         |                |
| 2PJY | 3.0        | A              | 112         | 2PJY_A--2PJY_B |
|      |            | B              | 108         | 2PJY_A--2PJY_C |
|      |            | C              | 79          | 2PJY_B--2PJY_C |
| 2Q7N | 4.0        | A              | 480         | 2Q7N_A--2Q7N_B |
|      |            | B              | 180         |                |
| 2QFA | 1.4        | A              | 137         | 2QFA_A--2QFA_B |
|      |            | B              | 62          | 2QFA_A--2QFA_C |
|      |            | C              | 45          | 2QFA_B--2QFA_C |
| 2QOU | 3.93       | C              | 206         | 2QOU_C--2QOU_E |
|      |            | D              | 205         | 2QOU_C--2QOU_J |
|      |            | E              | 150         | 2QOU_C--2QOU_N |
|      |            | F              | 100         | 2QOU_D--2QOU_E |
|      |            | G              | 150         | 2QOU_E--2QOU_H |
|      |            | H              | 29          | 2QOU_F--2QOU_R |
|      |            | I              | 127         | 2QOU_G--2QOU_I |
|      |            | J              | 98          | 2QOU_G--2QOU_K |
|      |            | K              | 11          | 2QOU_H--2QOU_L |
|      |            | L              | 123         | 2QOU_H--2QOU_Q |
|      |            | M              | 114         | 2QOU_I--2QOU_J |
|      |            | N              | 96          | 2QOU_I--2QOU_N |
|      |            | O              | 88          | 2QOU_J--2QOU_N |
|      |            | Q              | 80          | 2QOU_K--2QOU_R |
|      |            | R              | 55          | 2QOU_K--2QOU_U |
| S    | 79         | 2QOU_L--2QOU_Q |             |                |
| U    | 51         | 2QOU_M--2QOU_S |             |                |
|      |            |                |             | 2QOU_N--2QOU_S |
|      |            |                |             | 2QOU_O--2QOU_Q |
|      |            |                |             | 2QOU_R--2QOU_U |

**Table S1** (continued next page)

| PDB  | Resolution | Chains | Nb residues | Couples                                                                                                  |
|------|------------|--------|-------------|----------------------------------------------------------------------------------------------------------|
| 2QOV | 3.93       | 1      | 50          |                                                                                                          |
|      |            | 3      | 64          |                                                                                                          |
|      |            | 4      | 38          | 2QOV_1--2QOV_3                                                                                           |
|      |            | D      | 209         | 2QOV_3--2QOV_L                                                                                           |
|      |            | E      | 201         | 2QOV_4--2QOV_G                                                                                           |
|      |            | G      | 176         | 2QOV_D--2QOV_K                                                                                           |
|      |            | H      | 149         | 2QOV_D--2QOV_N                                                                                           |
|      |            | K      | 121         | 2QOV_D--2QOV_P                                                                                           |
|      |            | L      | 143         | 2QOV_E--2QOV_L                                                                                           |
|      |            | M      | 136         | 2QOV_G--2QOV_H                                                                                           |
|      |            | N      | 120         | 2QOV_H--2QOV_Z                                                                                           |
|      |            | P      | 114         | 2QOV_K--2QOV_P                                                                                           |
|      |            | T      | 93          | 2QOV_M--2QOV_V                                                                                           |
|      |            | V      | 94          | 2QOV_T--2QOV_X                                                                                           |
| 2R9P | 1.4        | A      | 24          | 2R9P_A--2R9P_E                                                                                           |
|      |            | E      | 58          |                                                                                                          |
| 2RGN | 3.5        | A      | 324         | 2RGN_A--2RGN_B<br>2RGN_B--2RGN_C                                                                         |
|      |            | B      | 327         |                                                                                                          |
|      |            | C      | 177         |                                                                                                          |
| 2RHK | 1.95       | A      | 119         | 2RHK_A--2RHK_C                                                                                           |
|      |            | C      | 63          |                                                                                                          |
| 2RMK | NMR        | A      | 192         | 2RMK_A--2RMK_B                                                                                           |
|      |            | B      | 81          |                                                                                                          |
| 2UZI | 2.0        | H      | 114         | 2UZI_H--2UZI_L                                                                                           |
|      |            | L      | 104         |                                                                                                          |
| 2V17 | 1.65       | H      | 222         | 2V17_H--2V17_L                                                                                           |
|      |            | L      | 214         |                                                                                                          |
| 2V8Q | 2.1        | A      | 102         | 2V8Q_A--2V8Q_B<br>2V8Q_A--2V8Q_E<br>2V8Q_B--2V8Q_E                                                       |
|      |            | B      | 73          |                                                                                                          |
|      |            | E      | 304         |                                                                                                          |
| 2VGL | 2.59       | A      | 600         | 2VGL_A--2VGL_B<br>2VGL_A--2VGL_M<br>2VGL_A--2VGL_S<br>2VGL_B--2VGL_M<br>2VGL_B--2VGL_S<br>2VGL_M--2VGL_S |
|      |            | B      | 579         |                                                                                                          |
|      |            | M      | 396         |                                                                                                          |
|      |            | S      | 142         |                                                                                                          |
| 2VP7 | 1.65       | A      | 66          | 2VP7_A--2VP7_B                                                                                           |
|      |            | B      | 33          |                                                                                                          |
| 2Z3Q | 1.85       | B      | 81          | 2Z3Q_B--2Z3Q_C                                                                                           |
|      |            | C      | 117         |                                                                                                          |
| 2Z5H | 2.89       | B      | 51          | 2Z5H_B--2Z5H_I<br>2Z5H_I--2Z5H_T                                                                         |
|      |            | I      | 39          |                                                                                                          |
|      |            | T      | 34          |                                                                                                          |

**Table S1** (continued next page)

| PDB  | Resolution | Chains | Nb residues | Couples        |
|------|------------|--------|-------------|----------------|
| 2ZCH | 2.83       | H      | 229         | 2ZCH_H--2ZCH_L |
|      |            | L      | 215         | 2ZCH_H--2ZCH_P |
|      |            | P      | 237         | 2ZCH_L--2ZCH_P |
| 2ZL1 | 2.0        | A      | 119         | 2ZL1_A--2ZL1_B |
|      |            | B      | 116         |                |
| 3B6F | 3.45       | C      | 106         | 3B6F_C--3B6F_H |
|      |            | H      | 99          |                |
| 3BC1 | 1.8        | B      | 52          | 3BC1_B--3BC1_E |
|      |            | E      | 175         |                |
| 3BES | 2.2        | L      | 133         | 3BES_L--3BES_R |
|      |            | R      | 250         |                |
| 3BJ4 | 2.0        | A      | 37          | 3BJ4_A--3BJ4_B |
|      |            | B      | 38          |                |
| 3BPL | 2.93       | B      | 202         | 3BPL_B--3BPL_C |
|      |            | C      | 194         |                |
| 3BRT | 2.25       | B      | 61          | 3BRT_B--3BRT_C |
|      |            | C      | 43          |                |
| 3BRW | 3.4        | B      | 337         | 3BRW_B--3BRW_D |
|      |            | D      | 167         |                |
| 3BS5 | 2.0        | A      | 83          | 3BS5_A--3BS5_B |
|      |            | B      | 74          |                |
| 3BT2 | 2.5        | A      | 124         | 3BT2_A--3BT2_U |
|      |            | B      | 40          | 3BT2_B--3BT2_U |
|      |            | H      | 212         | 3BT2_H--3BT2_L |
|      |            | L      | 211         | 3BT2_H--3BT2_U |
|      |            | U      | 259         | 3BT2_L--3BT2_U |
| 3BYH | 12.0 (EM)  | A      | 374         | 3BYH_A--3BYH_B |
|      |            | B      | 231         |                |
| 3C08 | 2.15       | H      | 217         | 3C08_H--3C08_L |
|      |            | L      | 206         |                |
| 3C5J | 1.8        | A      | 178         | 3C5J_A--3C5J_B |
|      |            | B      | 182         |                |
| 3C66 | 2.6        | A      | 529         | 3C66_A--3C66_C |
|      |            | C      | 24          |                |
| 3CH5 | 2.1        | A      | 193         | 3CH5_A--3CH5_B |
|      |            | B      | 37          |                |
| 3CL3 | 3.2        | A      | 172         | 3CL3_A--3CL3_D |
|      |            | D      | 59          |                |

**Table S1** (continued next page)

| PDB  | Resolution | Chains | Nb residues | Couples        |
|------|------------|--------|-------------|----------------|
| 3CWB | 3.51       | A      | 443         | 3CWB_A--3CWB_B |
|      |            | B      | 421         | 3CWB_A--3CWB_D |
|      |            | D      | 241         | 3CWB_A--3CWB_E |
|      |            | E      | 196         | 3CWB_A--3CWB_J |
|      |            | F      | 100         | 3CWB_D--3CWB_E |
|      |            | H      | 70          | 3CWB_D--3CWB_F |
|      |            | J      | 61          | 3CWB_D--3CWB_H |
|      |            | P      | 379         | 3CWB_D--3CWB_J |
|      |            | T      | 79          | 3CWB_E--3CWB_J |
| 3CXE | 3.3        | A      | 412         | 3CWB_E--3CWB_P |
|      |            | B      | 105         | 3CWB_P--3CWB_T |
|      |            | C      | 116         | 3CXE_A--3CXE_B |
| 3D0G | 2.8        | A      | 597         | 3CXE_B--3CXE_C |
|      |            | E      | 173         | 3D0G_A--3D0G_E |
| 3D1M | 1.7        | A      | 148         |                |
|      |            | D      | 99          | 3D1M_A--3D1M_D |
| 3D2U | 2.21       | A      | 281         |                |
|      |            | B      | 99          | 3D2U_A--3D2U_B |
| 3D48 | 2.5        | P      | 165         |                |
|      |            | R      | 195         | 3D48_P--3D48_R |
| 3D85 | 1.9        | A      | 213         | 3D85_A--3D85_B |
|      |            | B      | 216         | 3D85_A--3D85_C |
|      |            | C      | 133         | 3D85_B--3D85_C |
|      |            | D      | 290         | 3D85_C--3D85_D |
| 3DGC | 2.5        | M      | 141         |                |
|      |            | S      | 207         | 3DGC_S--3DGC_M |

**Table S1.** List of PDB structures used to create the CC-D dataset with its corresponding resolution. The chains included in the dataset, the number of residues of each chain and the experimental partners couples are indicated in the third, fourth and fifth columns respectively.



| protein | PrimI                 | OR (%) | SecI           | OR (%) | PrimI/SecI |
|---------|-----------------------|--------|----------------|--------|------------|
| 1AIK_C  | 1AIK_C--1AIK_A        | 69     | 1AIK_C--1AIK_N | 31     | 2.2        |
| 1AOX_A  | 1AOX_A--homolog1V7PB1 | 59     | 1AOX_A--1AOX_B | 20     | 2.95       |
| 1AOX_B  | 1AOX_B--homolog1V7PB2 | 68     | 1AOX_B--1AOX_A | 7      | 9.71       |
| 1EF1_C  | 1EF1_C--1EF1_A        | 89     | 1EF1_C--1EF1_D | 10     | 8.90       |
| 1FNT_J  | 1FNT_J--1FNT_I        | 33     | 1FNT_J--1FNT_B | 8      | 4.13       |
| 1GC1_C  | 1GC1_C--homolog1CDH   | 93     | 1GC1_C--1GC1_G | 7      | 13.29      |
| 1GK4_A  | 1GK4_A--1GK4_B        | 77     | 1GK4_A--1GK4_F | 12     | 6.42       |
| 1GK4_C  | 1GK4_C--1GK4_D        | 85     | 1GK4_C--1GK4_F | 13     | 6.54       |
| 1GK4_D  | 1GK4_D--1GK4_C        | 84     | 1GK4_D--1GK4_F | 14     | 6.00       |
| 1GK4_F  | 1GK4_F--1GK4_E        | 66     | 1GK4_F--1GK4_D | 22     | 3.00       |
| 1H2K_A  | 1H2K_A--1H2K_B        | 73     | 1H2K_A--1H2K_S | 27     | 2.70       |
| 1I7X_A  | 1I7X_A--homolog1G3J   | 58     | 1I7X_A--1I7X_C | 19     | 3.05       |
| 1JJO_A  | 1JJO_A--1JJO_C        | 70     | 1JJO_A--1JJO_E | 22     | 3.18       |
| 1JJO_E  | 1JJO_E--1JJO_C        | 62     | 1JJO_E--1JJO_A | 38     | 1.63       |
| 1KFU_L  | 1KFU_L--homolog3DF0   | 96     | 1KFU_L--1KFU_S | 4      | 24.00      |
| 1LDK_A  | 1LDK_A--1LDK_E        | 64     | 1LDK_A--1LDK_B | 11     | 5.82       |
| 1LDK_B  | 1LDK_B--1LDK_C        | 78     | 1LDK_B--1LDK_A | 22     | 3.55       |
| 1LI1_A  | 1LI1_A--1LIA_C        | 73     | 1LI1_A--1LI1_B | 22     | 3.32       |
| 1LI1_B  | 1LI1_B--1LI1_A        | 63     | 1LI1_B--1LI1_C | 30     | 2.10       |
| 1M3D_A  | 1M3D_A--1M3D_C        | 63     | 1M3D_A--1M3D_B | 33     | 1.91       |
| 1M3D_B  | 1M3D_B--1M3D_A        | 55     | 1M3D_B--1M3D_F | 1      | 55.00      |
| 1M3D_C  | 1M3D_C--1M3D_B        | 49     | 1M3D_C--1M3D_E | 1      | 49.00      |
| 1M3D_E  | 1M3D_E--1M3D_D        | 57     | 1M3D_E--1M3D_C | 1      | 57.00      |
| 1M3D_F  | 1M3D_F--1M3D_D        | 44     | 1M3D_F--1M3D_B | 1      | 44.00      |
| 1M3D_G  | 1M3D_G--1M3D_I        | 60     | 1M3D_G--1M3D_H | 35     | 1.71       |
| 1M3D_L  | 1M3D_L--1M3D_J        | 44     | 1M3D_L--1M3D_H | 1      | 44.00      |
| 1NH2_B  | 1NH2_B--1NH2_D        | 81     | 1NH2_B--1NH2_C | 19     | 4.26       |
| 1NH2_C  | 1NH2_C--1NH2_D        | 44     | 1NH2_C--1NH2_B | 16     | 2.75       |
| 1PYO_B  | 1PYO_B--1PYO_A        | 88     | 1PYO_B--1PYO_D | 6      | 14.67      |
| 1R4M_B  | 1R4M_B--1R4M_A        | 60     | 1R4M_B--1R4M_I | 20     | 3.00       |
| 1R4M_I  | 1R4M_I--1R4M_B        | 100    | 1R4M_I--1R4M_A | 0      | NA         |
| 1RF3_A  | 1RF3_A--1RF3_E        | 44     | 1RF3_A--1RF3_B | 26     | 1.69       |
| 1VYH_A  | 1VYH_A--1VYH_B        | 72     | 1VYH_A--1VYH_C | 13     | 5.54       |
| 1YY9_C  | 1YY9_C--1YY9_D        | 98     | 1YY9_C--1YY9_A | 2      | 49.00      |
| 1YY9_D  | 1YY9_D--1YY9_C        | 62     | 1YY9_D--1YY9_A | 38     | 1.63       |
| 2BDN_H  | 2BDN_H--2BDN_L        | 64     | 2BDN_H--2BDN_A | 36     | 1.78       |
| 2BDN_L  | 2BDN_L--2BDN_H        | 92     | 2BDN_L--2BDN_A | 8      | 11.5       |
| 2BKI_B  | 2BKI_B--2BKI_A        | 63     | 2BKI_B--2BKI_D | 37     | 1.70       |
| 2BKI_D  | 2BKI_D--2BKI_B        | 63     | 2BKI_D--2BKI_A | 37     | 1.70       |
| 2BOV_A  | 2BOV_A--homolg1UAD    | 79     | 2BOV_A--2BOV_B | 21     | 3.76       |
| 2COL_A  | 2COL_A--homolog1FCH   | 80     | 2COL_A--2COL_B | 20     | 4.00       |
| 2C74_A  | 2C74_A--2C74_P        | 81     | 2C74_A--2C74_B | 19     | 4.26       |
| 2C74_B  | 2C74_B--2C74_Q        | 74     | 2C74_B--2C74_A | 26     | 2.85       |
| 2C9W_C  | 2C9W_C--2C9W_B        | 77     | 2C9W_C--2C9W_A | 23     | 3.35       |

**Table S2** (continued next page)

| protein | PrimI                | OR (%) | SecI           | OR (%) | PrimI/SecI |
|---------|----------------------|--------|----------------|--------|------------|
| 2DJG_A  | 2DJG_A--2DJG_B       | 78     | 2DJG_A--2DJG_C | 22     | 3.55       |
| 2DJG_B  | 2DJG_B--2DJG_A       | 71     | 2DJG_B--2DJG_C | 29     | 2.45       |
| 2DRN_A  | 2DRN_A--2DRN_B       | 72     | 2DRN_A--2DRN_C | 28     | 2.57       |
| 2E9W_A  | 2E9W_A--2E9W_B       | 92     | 2E9W_A--2E9W_C | 8      | 11.50      |
| 2E9X_A  | 2E9X_A--2E9X_D       | 62     | 2E9X_A--2E9X_F | 9      | 6.89       |
| 2E9X_C  | 2E9X_C--2E9X_A       | 58     | 2E9X_C--2E9X_B | 16     | 3.63       |
| 2GEZ_B  | 2GEZ_B--2GEZ_A       | 71     | 2GEZ_B--2GEZ_C | 13     | 5.46       |
| 2GEZ_C  | 2GEZ_C--2GEZ_D       | 46     | 2GEZ_C--2GEZ_B | 5      | 9.20       |
| 2NNW_A  | 2NNW_A--homolog3NMU  | 84     | 2NNW_A--2NNW_B | 5      | 16.80      |
| 2NQB_G  | 2NQB_G--2NQB_H       | 71     | 2NQB_G--2NQB_D | 9      | 7.89       |
| 2O8A_I  | 2O8A_I--homolog3N5U  | 83     | 2O8A_I--2O8A_A | 17     | 4.88       |
| 2P1L_B  | 2P1L_B--homologH     | 64     | 2P1L_B--2P1L_A | 36     | 1.78       |
| 2PJY_C  | 2PJY_C--2PJY_D       | 57     | 2PJY_C--2PJY_A | 22     | 2.59       |
| 2RGN_B  | 2RGN_B--2RGN_C       | 68     | 2RGN_B--2RGN_A | 32     | 2.13       |
| 2RHK_A  | 2RHK_A--2RHK_B       | 73     | 2RHK_A--2RHK_C | 27     | 2.70       |
| 2UZI_H  | 2UZI_H--2UZI_L       | 84     | 2UZI_H--2UZI_R | 16     | 5.25       |
| 2UZI_L  | 2UZI_L--2UZI_H       | 75     | 2UZI_L--2UZI_R | 25     | 3.00       |
| 2V8Q_A  | 2V8Q_A--2V8Q_B       | 80     | 2V8Q_A--2V8Q_E | 20     | 4.00       |
| 2V8Q_E  | 2V8Q_E--2V8Q_A       | 74     | 2V8Q_E--2V8Q_B | 26     | 2.85       |
| 2VGL_B  | 2VGL_B--2VGL_M       | 58     | 2VGL_B--2VGL_S | 7      | 8.29       |
| 2VGL_M  | 2VGL_M--2VGL_B       | 76     | 2VGL_M--2VGL_S | 16     | 4.75       |
| 2VGL_S  | 2VGL_S--2VGL_A       | 67     | 2VGL_S--2VGL_B | 18     | 3.72       |
| 2Z3Q_C  | 2Z3Q_C--2Z3Q_D       | 62     | 2Z3Q_C--2Z3Q_B | 38     | 1.63       |
| 2Z5H_B  | 2Z5H_B--2Z5H_A       | 48     | 2Z5H_B--2Z5H_I | 13     | 3.69       |
| 2ZCH_H  | 2ZCH_H--2ZCH_L       | 83     | 2ZCH_H--2ZCH_P | 17     | 4.88       |
| 2ZCH_L  | 2ZCH_L--2ZCH_H       | 89     | 2ZCH_L--2ZCH_P | 11     | 8.09       |
| 3B6F_C  | 3B6F_C--3B6F_D       | 68     | 3B6F_C--3B6F_E | 12     | 5.67       |
| 3BC1_E  | 3BC1_E--3BC1_F       | 64     | 3BC1_E--3BC1_B | 9      | 7.11       |
| 3BES_L  | 3BES_L--3BES_A       | 56     | 3BES_L--3BES_R | 27     | 2.07       |
| 3BES_R  | 3BES_R--3BES_D       | 31     | 3BES_R--3BES_L | 7      | 4.43       |
| 3BT2_H  | 3BT2_H--3BT2_U       | 68     | 3BT2_H--3BT2_L | 32     | 2.13       |
| 3BT2_L  | 3BT2_L--3BT2_H       | 70     | 3BT2_L--3BT2_U | 30     | 2.33       |
| 3CH5_A  | 3CH5_A--homolog_1IBR | 73     | 3CH5_A--3CH5_B | 27     | 2.70       |
| 3CL3_D  | 3CL3_D--3CL3_B       | 68     | 3CL3_D--3CL3_A | 13     | 5.23       |
| 3CWB_B  | 3CWB_B--3CWB_O       | 86     | 3CWB_B--3CWB_A | 3      | 28.67      |
| 3CWB_E  | 3CWB_E--3CWB_P       | 66     | 3CWB_E--3CWB_D | 7      | 9.43       |
| 3CWB_F  | 3CWB_F--3CWB_C       | 68     | 3CWB_F--3CWB_D | 15     | 4.53       |
| 3D85_A  | 3D85_A--3D85_B       | 96     | 3D85_A--3D85_C | 4      | 24.00      |
| 3D85_B  | 3D85_B--3D85_A       | 67     | 3D85_B--3D85_C | 33     | 2.03       |
| 3D85_C  | 3D85_C--3D85_D       | 58     | 3D85_C--3D85_B | 10     | 5.80       |
| 3DGC_M  | 3DGC_M--3DGC_S       | 70     | 3DGC_M--3DGC_R | 30     | 2.33       |

**Table S2.** List of proteins presenting occupancy rates (OR) at least 50% superior for the Primary Interface (PrimI) compared to Secondary Interface (SecI). The last column PrimI/SecI indicates the ratio value of the PrimI's occupancy rate over the SecI's occupancy rate.

| Descriptors                         | Greater         | Less            |
|-------------------------------------|-----------------|-----------------|
| % Acidic                            | 7.21E-01        | 2.79E-01        |
| % Acyclic                           | 3.43E-01        | 6.57E-01        |
| % Aliphatic                         | 1.44E-02        | 9.86E-01        |
| % Alpha character                   | 2.55E-01        | 7.45E-01        |
| % Aromatic                          | 6.97E-01        | 3.03E-01        |
| % Basic                             | 8.89E-01        | 1.11E-01        |
| % Beta character                    | 1.38E-02        | 9.86E-01        |
| Carbon                              | 1.24E-02        | 9.88E-01        |
| % Charged contribution              | 9.81E-01        | 1.95E-02        |
| % Charged Residues                  | 8.55E-01        | 1.45E-01        |
| Circularity                         | 2.70E-01        | 7.30E-01        |
| % Coil                              | 8.34E-01        | 1.66E-01        |
| ContRes                             | <b>1.09E-04</b> | 1.00E+00        |
| ContRC                              | <b>1.61E-08</b> | 1.00E+00        |
| ContRHyd                            | <b>8.74E-10</b> | 1.00E+00        |
| ContRN                              | <b>2.54E-08</b> | 1.00E+00        |
| ContRP                              | <b>8.18E-06</b> | 1.00E+00        |
| % Cyclic                            | 6.57E-01        | 3.43E-01        |
| Eccentricity                        | 7.87E-01        | 2.13E-01        |
| Fluor                               | NA              | NA              |
| Gap Volume                          | <b>6.30E-05</b> | 1.00E+00        |
| Hydrogen                            | 5.91E-01        | 4.09E-01        |
| % Interface Accessible Surface Area | <b>1.71E-09</b> | 1.00E+00        |
| Interface Accessible Surface Area   | <b>1.03E-08</b> | 1.00E+00        |
| % Large                             | 4.23E-01        | 5.77E-01        |
| % Medium                            | 2.29E-01        | 7.71E-01        |
| Nb of hydrogen bonds                | <b>1.09E-03</b> | 9.99E-01        |
| Nb of non-bonded contacts           | <b>1.55E-06</b> | 1.00E+00        |
| Nb of salt bridges                  | 1.61E-01        | 8.39E-01        |
| % Neutral contribution              | 9.19E-02        | 9.08E-01        |
| (N)itrogen                          | 9.37E-01        | 6.30E-02        |
| % Non polar contribution            | <b>2.60E-08</b> | 1.00E+00        |
| N+O+P+S                             | 3.13E-01        | 6.87E-01        |
| Number of Segments                  | <b>8.66E-05</b> | 1.00E+00        |
| (O)xygen                            | 9.26E-01        | 7.44E-02        |
| (P)hosphorus                        | NA              | NA              |
| Planarity                           | <b>1.61E-07</b> | 1.00E+00        |
| % Polar contribution                | 1.00E+00        | <b>2.61E-08</b> |
| % Small                             | 8.96E-01        | 1.04E-01        |
| (S)ulfur                            | 1.86E-01        | 8.14E-01        |
| Total Interface Area                | <b>1.88E-08</b> | 1.00E+00        |
| Total Nb of Disulfide bonds         | 7.91E-01        | 2.09E-01        |
| Total Nb of Segments                | <b>3.25E-06</b> | 1.00E+00        |

**Table S3.** p-values obtained for each one of the 43 2P2I inspector descriptors in the one-tailed Student test with the option « greater » (column « Greater ») and « less » (column « Less »). The significant p-values using the Bonferonni threshold are indicated in bold.
